# Supplementary material for: Transcriptomic Deconvolution Reveals Prognostic Immune Signatures and Immunotherapy-Responsive Subtypes in Male Breast Cancer
Source: Research Square preprint supplement (doi:10.21203/rs.3.rs-7572724/v1), 2025-10-27
Supplement: Supplementary file 1 [file 6b9212730bc9aad3a26033ae.xlsx]

## Sheet: S1
Supplementary Table 1: Enrichment of differentially expressed genes between Cluster 1 and Cluster 2 MBCs.
Category	Term	Count	%	PValue	Genes	List Total	Pop Hits	Pop Total	Fold Enrichment	Bonferroni	Benjamini	FDR
UP_KW_CELLULAR_COMPONENT	KW-1280~Immunoglobulin	56	2.9442691903259726	6.994470488808858E-20	IGHM, IGHV4-31, IGHV3-23, IGHV1-2, IGHV4-34, IGKV3D-15, IGLV8-61, IGLV2-8, IGKV1-16, IGKV2-29, IGKV1-17, IGKV2-28, IGKV1-12, IGLC3, IGLC2, IGHV3-7, IGHV3-30, IGKV3D-20, IGHV1-18, IGLV4-69, IGKV2D-29, IGKV1-27, IGLV3-10, IGKV4-1, IGKV2-30, IGLV3-19, IGHV2-70, IGHV2-5, IGHV3-48, IGLV3-1, IGHV3-49, IGLV2-11, IGLV3-25, IGLV1-40, IGLV3-27, IGLV1-47, IGLV6-57, IGLV2-14, IGKV3-15, IGLV2-18, IGKV1-33, IG…	1461	169	17831	4.044145818904941	4.196682293285315E-18	4.196682293285315E-18	3.846958768844872E-18
GOTERM_MF_DIRECT	GO:0003823~antigen binding	50	2.6288117770767614	1.1535251943100534E-18	FCN2, IGHM, CD40, IGHV4-31, IGHV1OR15-1, IGHV3-23, IGHV1-2, IGHV4-34, IGLV2-8, IGKV1-16, IGKV1-17, IGLC3, IGLC2, IGHV3-7, LAG3, IGHV3-30, IGHV1-18, IGKV4-1, CD48, IGKV2-30, IGLV3-19, IGHV2-70, IGHV2-5, IGHV3-48, IGLV3-1, IGHV3-49, IGLV2-11, IGLV3-25, IGLV1-40, IGLV3-27, IGLV1-47, IGLV6-57, IGLV2-14, TSPAN4, IGKV3-15, TRDC, IGKV1-33, IGKV3-11, IGHV4-61, IGHV3-53, IGLC7, IGKV2D-40, IGHV3-11, IGKV1-…	1539	146	18976	4.222631667957311	1.663383330195097E-15	1.663383330195097E-15	1.6610762798064769E-15
GOTERM_CC_DIRECT	GO:0019814~immunoglobulin complex	49	2.576235541535226	1.0692107088694864E-17	IGHV4-31, IGHV3-23, IGHV4-34, IGKV3D-15, IGLV8-61, IGLV2-8, IGKV1-16, IGKV2-29, IGKV1-17, IGKV2-28, IGKV1-12, IGHV3-7, IGHV3-30, IGKV3D-20, IGHV1-18, IGLV4-69, IGKV2D-29, IGKV1-27, IGLV3-10, IGKV4-1, IGKV2-30, IGLV3-19, IGHV2-70, IGHV2-5, IGHV3-48, IGLV3-1, IGHV3-49, IGLV2-11, IGLV3-25, IGLV1-40, IGLV3-27, IGLV1-47, IGLV6-57, IGLV2-14, IGKV3-15, IGLV2-18, IGKV1-33, IGKV3-11, IGHV4-61, IGKV1-9, IG…	1642	150	20660	4.110190824198132	9.751201664889716E-15	9.751201664889716E-15	9.633588486914072E-15
GOTERM_BP_DIRECT	GO:0006955~immune response	96	5.047318611987381	7.958940049044063E-15	IFITM3, CXCL9, IFITM2, IGHV3-23, IGHV1-2, IGHV4-34, SECTM1, FASLG, IGKV3D-15, IGLV8-61, TNFSF13B, IL27RA, IGLV2-8, SPN, PYCARD, FCGR3A, IL18RAP, IGKV1-16, IGKV2-29, IGKV1-17, IGKV2-28, IGKV1-12, CCR8, CTLA4, TRAV2, CCR7, IKBKG, IGHV3-7, CCR5, IKBKE, B2M, TRIM22, CD96, IGHV3-30, IGKV3D-20, HLA-C, LAX1, IGLV4-69, IGKV2D-29, AIM2, IGKV1-27, IGLV3-10, IGKV4-1, IGKV2-30, IGLV3-19, TRAV9-2, IGHV2-70, C…	1566	512	19462	2.3302203065134095	3.920064273188473E-11	3.9030642000512085E-11	3.896697048011973E-11
GOTERM_BP_DIRECT	GO:0002377~immunoglobulin production	34	1.7875920084121977	1.7121034350918766E-14	IGLV3-1, IGKV3D-15, IGLV8-61, IGLV2-11, IGLV2-8, IGLV3-25, IGLV1-40, IGLV3-27, IGKV1-16, IGLV1-47, IGLV6-57, IGKV2-29, IGKV1-17, IGLV2-14, IGKV2-28, IGKV1-12, IGKV3-15, IGLV2-18, TRAV2, IGKV1-9, IGKV1-6, IGKV1-5, IGKV3D-20, IGLV7-43, IGLV4-69, IGKV2D-29, IGKV1-27, IGLV3-10, IGLV2-23, IGKV4-1, IGKV1D-8, IGKV3-20, IGKV2-30, IGLV3-19	1566	89	19462	4.747714781810094	8.384581917653122E-11	4.198077622845281E-11	4.191229209104914E-11
SMART	SM00406:IGv	71	3.732912723449001	2.708995297371487E-14	PIGR, IGHM, IGHV4-31, IGHV1OR15-1, IGHV3-23, IGHV1-2, IGHV4-34, IGKV3D-15, SIRPB1, IGLV8-61, HAPLN1, IGLV2-8, IGKV1-16, IGKV2-29, IGKV1-17, VSIG2, IGKV2-28, IGKV1-12, CTLA4, PTGFRN, IGHV3-7, B2M, IGHV3-30, IGKV3D-20, IGHV1-18, IGLV4-69, IGKV2D-29, IGKV1-27, IGLV3-10, MXRA8, IGKV4-1, CD101, IGKV2-30, IGLV3-19, TRAV9-2, IGHV2-70, IGHV2-5, IGHV3-48, IGLV3-1, IGHV3-49, THY1, IGLV2-11, IGLV3-25, IGLV1…	842	329	10366	2.6568165245579713	1.0239809000722744E-11	1.0240002224064222E-11	1.0240002224064222E-11
UP_KW_BIOLOGICAL_PROCESS	KW-1064~Adaptive immunity	95	4.9947423764458465	5.324426390766049E-14	IGHM, CD84, IGHV4-31, PRR7, IGHV3-23, IGHV1-2, TRAC, IGHV4-34, TNFRSF13C, CD3E, IGKV3D-15, IGLV8-61, IGLV2-8, IL4I1, IGKV1-16, IGKV2-29, IGKV1-17, IGKV2-28, LAMP3, IGKV1-12, IGLC3, CTLA4, TRAV2, IGLC2, IGHV3-7, CTNNBL1, EOMES, FGA, LAG3, IGHV3-30, SYK, PRKCB, IGKV3D-20, HLA-C, LAX1, IGHV1-18, IGLV4-69, IGKV2D-29, IGKV1-27, IGLV3-10, IGKV4-1, TNFRSF21, IGKV2-30, IGLV3-19, TRAV9-2, IGHV2-70, IGHV2-…	980	492	11376	2.2414136386261823	7.993605777301127E-12	6.293338093155891E-12	6.083560156717361E-12
UP_KW_BIOLOGICAL_PROCESS	KW-0391~Immunity	148	7.781282860147214	8.391117457541188E-14	IFITM3, FCN2, IFITM1, CD84, IFITM2, IGHV3-23, TRAC, IFIT5, IGLV8-61, IGLV2-8, PYCARD, HERC5, IL4I1, IGKV1-16, IGKV1-17, LAMP3, IGKV1-12, TRIM25, MAP3K8, LGALS9, IGHV3-7, B2M, EOMES, ZBP1, LAG3, IGHV3-30, RSAD2, PRKCB, HLA-C, MIF, LAX1, IGHV1-18, IGKV2D-29, IGKV1-27, IFI27, IGKV4-1, SERPING1, PRKCQ, NAIP, TAPBPL, MST1R, IGLV2-11, CD79B, IGLV1-40, IGLV6-57, IGLV1-47, IGLV2-14, IGKV3-15, IGLV2-18, S…	980	935	11376	1.8374418858452473	1.2589929099249275E-11	6.293338093155891E-12	6.083560156717361E-12
GOTERM_CC_DIRECT	GO:0009897~external side of plasma membrane	89	4.679284963196635	1.3980387395999742E-13	FCN2, IGHM, CD84, CXCL9, CD40, IGHV4-31, CD83, IGHV1OR15-1, TFRC, IGHV3-23, IGHV1-2, IGHV4-34, FASLG, TNFRSF13C, ITGAE, CD3E, ITGAL, ICAM1, IL27RA, SPN, FCGR3A, PLAU, IGLC3, CCR8, CTLA4, CCR7, IGLC2, IGHV3-7, CCR5, B2M, IL6R, CTSB, FGA, LAG3, IGHV3-30, HLA-C, ATP1B2, GFRA3, IGHV1-18, SCNN1B, CD48, IGHV2-70, GRIA2, SEMA7A, NLGN1, IGHV2-5, CXCR4, IGHV3-48, ADAM20, PLG, IGHV3-49, THY1, EFNA5, IL2RG,…	1642	484	20660	2.3136720991332886	1.2747669586588017E-10	6.375056652575883E-11	6.298164521897884E-11
GOTERM_MF_DIRECT	GO:0005515~protein binding	1152	60.56782334384858	3.2749312082663176E-13	TDRKH, POP5, POP7, TFRC, ZFYVE9, PWWP2B, ARAF, SLA2, ZC3H12D, FAM110A, IL4I1, PSMD9, KRTCAP3, SYNGAP1, ALKBH4, DPYSL4, UBASH3B, PSMD4, FGFR1OP2, DPYSL3, UBASH3A, GTSE1, STARD3, ZNF19, SDS, CSNK2A1, TOMM20L, HPCAL1, DNTTIP1, RFX2, TMEM80, RNASE1, SCAMP2, SIGIRR, AR, DDX39A, DDX39B, DDIT4, PSME1, TXNIP, CDIP1, C5ORF46, ZBTB8A, ZNF273, CRABP2, SHMT2, CRABP1, CDCA7, MRPL17, CDCA8, SLC5A1, THY1, TAPBP…	1539	12657	18976	1.1222451852683513	4.722777724452953E-10	2.361225401160015E-10	2.357950469951749E-10
UP_SEQ_FEATURE	DOMAIN:Ig-like	105	5.520504731861198	2.8954668351301826E-11	IGHV3-23, ICAM5, IGLV8-61, IGLV2-8, ISLR, IGKV1-16, IGKV1-17, IGKV1-12, PTGFRN, IGHV3-7, B2M, IL6R, CDON, CD96, IGHV3-30, HLA-C, IGHV1-18, SIGIRR, IGKV2D-29, IGKV1-27, MXRA8, IGKV4-1, CD101, SEMA7A, IGSF1, TAPBPL, THY1, TMEM25, IGLV2-11, IGLV1-40, IGLV6-57, IGLV1-47, IGLV2-14, IGKV3-15, IGLV2-18, SLAMF7, SLAMF6, IGKV3-11, IGHV4-61, HLA-DRB5, VCAM1, IGKV2D-40, TRAV12-2, IGHV3-11, CRTAM, PILRB, IGL…	1627	676	20583	1.9650052916210543	1.660547117587896E-7	1.66055022994716E-7	1.66055022994716E-7
UP_KW_DOMAIN	KW-0393~Immunoglobulin domain	116	6.0988433228180865	5.754714336285809E-11	CD84, CD83, IGHV3-23, ICAM2, ICAM5, IGLV8-61, ICAM1, IGLV2-8, ISLR, IL18RAP, IGKV1-16, IGKV1-17, VSIG2, IGKV1-12, PTGFRN, IGHV3-7, B2M, IL6R, CDON, CD96, LAG3, IGHV3-30, IGHV1-18, SIGIRR, IGKV2D-29, IGKV1-27, MXRA8, IGKV4-1, CD101, SEMA7A, IGSF1, TAPBPL, THY1, TMEM25, IGLV2-11, IGSF22, CD79B, IGLV1-40, IGLV6-57, IGLV1-47, IGLV2-14, IGKV3-15, IGLV2-18, SLAMF7, SLAMF6, ICOS, IGKV3-11, IGHV4-61, VCA…	1190	766	14587	1.8563003269192795	1.783962866319655E-9	1.7839614442486007E-9	1.7839614442486007E-9
INTERPRO	IPR013106:Immunoglobulin V-set	83	4.363827549947423	9.30368609084087E-11	PIGR, IGHM, IGHV4-31, CD83, IGHV1OR15-1, IGHV3-23, IGHV1-2, IGHV4-34, IGKV3D-15, SIRPB1, IGLV8-61, HAPLN1, IGLV2-8, IGKV1-16, IGKV2-29, IGKV1-17, VSIG2, IGKV2-28, IGKV1-12, CTLA4, TRAV2, PTGFRN, IGHV3-7, B2M, IGHV3-30, IGKV3D-20, IGHV1-18, IGLV4-69, IGKV2D-29, IGKV1-27, IGLV3-10, MXRA8, IGKV4-1, CD48, CD101, IGKV2-30, IGLV3-19, TRAV9-2, IGHV2-70, IGHV2-5, IGHV3-48, IGLV3-1, IGHV3-49, THY1, TAPBPL…	1577	475	19129	2.1195567867036007	1.9007439211460309E-7	1.9007430683587896E-7	1.9007430683587896E-7
GOTERM_CC_DIRECT	GO:0070062~extracellular exosome	258	13.564668769716087	3.040566225159218E-10	TFRC, SLC23A1, IGHV3-23, ENO1, ACTB, ICAM1, ISLR, IGKV1-17, CPNE3, UBASH3A, IGHV3-7, B2M, GOLGA7, ENTPD2, PRKCB, KRT2, ECH1, KRT8, SYTL1, HLA-C, MOGS, MIF, RNASE1, SCAMP2, PSME1, MXRA8, SERPING1, PADI2, TAGLN2, VPS25, CD101, VPS28, C5ORF46, SDC4, CRABP2, SHMT2, SLC5A1, THY1, MYL12B, CD79B, CYB5R1, PRDX5, PRDX4, SYNGR2, RACGAP1, ZNHIT6, PRDX1, PCBP1, FIGNL1, SLAMF6, SFN, APOD, APOE, CD14, GSTT2B, …	1642	2240	20660	1.4492017574386638	2.7729964346967506E-7	9.243321324484023E-8	9.131833896228184E-8
GOTERM_BP_DIRECT	GO:0002250~adaptive immune response	77	4.048370136698212	8.844861205105364E-10	IGHM, CD84, PRR7, TRAC, TNFRSF13C, CD3E, IGKV3D-15, IGLV8-61, IGLV2-8, IL4I1, IGKV1-16, IGKV2-29, IGKV1-17, IGKV2-28, LAMP3, IGKV1-12, IGLC3, CTLA4, TRAV2, CTNNBL1, EOMES, FGA, LAG3, SYK, PRKCB, IGKV3D-20, HLA-C, LAX1, IGLV4-69, IGKV2D-29, IGKV1-27, IGLV3-10, IGKV4-1, TNFRSF21, IGKV2-30, IGLV3-19, TRAV9-2, IGLV3-1, IGLV2-11, CD79B, IGLV3-25, IGLV1-40, IGLV3-27, IGLV1-47, IGLV6-57, IGLV2-14, IGKV3…	1566	457	19462	2.0939689406451647	4.3375106792975515E-6	1.4458399783278902E-6	1.4434813486731954E-6
INTERPRO	IPR007110:Immunoglobulin-like domain	113	5.94111	1.0602617164763148E-9	CD84, CD83, IGHV3-23, ICAM5, IGLV8-61, IGLV2-8, ISLR, IL18RAP, IGKV1-16, IGKV1-17, VSIG2, IGKV1-12, PTGFRN, IGHV3-7, B2M, IL6R, CDON, CD96, LAG3, IGHV3-30, HLA-C, IGHV1-18, SIGIRR, IGKV2D-29, IGKV1-27, MXRA8, IGKV4-1, CD101, SEMA7A, IGSF1, TAPBPL, THY1, TMEM25, IGLV2-11, IGSF22, CD79B, IGLV1-40, IGLV6-57, IGLV1-47, IGLV2-14, IGKV3-15, IGLV2-18, SLAMF7, SLAMF6, IGKV3-11, IGHV4-61, HLA-DRB5, VCAM1,…	1577	763	19129	1.7964472915459866	2.1661124456340275E-6	1.0830573433805556E-6	1.0830573433805556E-6
GOTERM_BP_DIRECT	GO:0016064~immunoglobulin mediated immune response	26	1.3669821240799158	8.930841574401825E-9	IGHV2-70, IGHV4-31, IGHV2-5, IGHV3-23, IGHV4-34, IGHV3-48, IGHV3-49, IGLC3, IL21R, IGLC2, IGHV3-7, CD74, IGHV4-61, IGHV3-30, IGHV3-53, IGLC7, IGHV3-11, IGLC6, IGHV4-28, IGHV1-18, IGLL5, IL2RB, IRF7, CD27, FCGR2B, MYD88	1566	86	19462	3.7572544477115453	4.379588844094506E-5	1.0949211770216637E-5	1.0931350087067835E-5
GOTERM_CC_DIRECT	GO:0072562~blood microparticle	33	1.7350157728706623	1.5234973837192397E-7	LGALS3BP, FCN2, IGHM, TFRC, IGHV3-23, SLC2A1, CIB2, PLG, ACTB, IGLV3-25, IGLV1-47, IGKV1-17, IGLC3, IGKV3-15, IGKV1-33, IGLC2, APOE, APOL1, IGHV3-7, IGKV3-11, FGA, HBG2, IGKV2D-40, IGKV1-5, FN1, CP, YWHAZ, IGKV4-1, SERPING1, ANGPTL4, IGKV3-20, IGKV2-30, C1QC	1642	148	20660	2.8054942884419134	1.3893331985914692E-4	3.4735740348798664E-5	3.431677856827588E-5
REACTOME_PATHWAY	R-HSA-69239~Synthesis of DNA	31	1.6298633017875919	2.5659420105700107E-7	FEN1, PCNA, GMNN, ANAPC11, POLD3, POLD4, PSMD9, PSMB4, CDC45, ORC1, PSMD4, PSMB3, POLD1, PSMF1, CDT1, RFC4, UBE2C, RBX1, POLA2, PSMA3, PSMC3, CCNE2, CCNE1, PSMC4, UBE2S, PSMA2, PSMC1, MCM3, PSME1, MCM6, MCM2	1011	120	11009	2.8130481371579297	4.445789530498345E-4	4.4467775043178283E-4	4.326178229821038E-4
INTERPRO	IPR013783:Immunoglobulin-like fold	141	7.413249211356467	2.843078482489947E-7	CD84, CD83, IGHV3-23, TRAC, ICAM2, ICAM5, IGLV8-61, ICAM1, IL27RA, IGLV2-8, ISLR, IL18RAP, IGKV1-16, IGKV1-17, VSIG2, IGKV1-12, PTGFRN, IGHV3-7, B2M, IL6R, CDON, CD96, LAG3, IGHV3-30, HLA-C, MID1, IGHV1-18, SIGIRR, IGKV2D-29, IGKV1-27, FNDC1, LOX, MXRA8, IGKV4-1, CD101, PMEL, SEMA7A, IGSF1, TAPBPL, MST1R, THY1, TMEM25, IGLV2-11, IGSF22, CD79B, IGLV1-40, IGLV6-57, IGLV1-47, IGLV2-14, IGKV3-15, IGL…	1577	1118	19129	1.5298113648455038	5.806723610843889E-4	1.936136446575654E-4	1.936136446575654E-4
UP_SEQ_FEATURE	REGION:Framework-1	11	0.5783385909568874	4.3828107615014264E-7	IGLV6-57, IGKV1-16, IGKV1-17, IGKV1-5, IGKV3-15, IGKV4-1, IGKV1-33, IGLV7-43, IGKV3-11, IGKV3-20, IGKV2-30	1627	19	20583	7.3242001746837895	0.00251039	4.1892366195351135E-4	4.1892366195351135E-4
UP_SEQ_FEATURE	REGION:Framework-3	11	0.5783385909568874	4.3828107615014264E-7	IGLV6-57, IGKV1-16, IGKV1-17, IGKV1-5, IGKV3-15, IGKV4-1, IGKV1-33, IGLV7-43, IGKV3-11, IGKV3-20, IGKV2-30	1627	19	20583	7.3242001746837895	0.00251039	4.1892366195351135E-4	4.1892366195351135E-4
UP_SEQ_FEATURE	REGION:Framework-2	11	0.5783385909568874	4.3828107615014264E-7	IGLV6-57, IGKV1-16, IGKV1-17, IGKV1-5, IGKV3-15, IGKV4-1, IGKV1-33, IGLV7-43, IGKV3-11, IGKV3-20, IGKV2-30	1627	19	20583	7.3242001746837895	0.00251039	4.1892366195351135E-4	4.1892366195351135E-4
UP_SEQ_FEATURE	REGION:Complementarity-determining-2	11	0.5783385909568874	4.3828107615014264E-7	IGLV6-57, IGKV1-16, IGKV1-17, IGKV1-5, IGKV3-15, IGKV4-1, IGKV1-33, IGLV7-43, IGKV3-11, IGKV3-20, IGKV2-30	1627	19	20583	7.3242001746837895	0.00251039	4.1892366195351135E-4	4.1892366195351135E-4
UP_SEQ_FEATURE	REGION:Complementarity-determining-1	11	0.5783385909568874	4.3828107615014264E-7	IGLV6-57, IGKV1-16, IGKV1-17, IGKV1-5, IGKV3-15, IGKV4-1, IGKV1-33, IGLV7-43, IGKV3-11, IGKV3-20, IGKV2-30	1627	19	20583	7.3242001746837895	0.00251039	4.1892366195351135E-4	4.1892366195351135E-4
GOTERM_BP_DIRECT	GO:0050853~B cell receptor signaling pathway	30	1.5772870662460567	1.1660631038505018E-6	IGHV2-70, IGHM, IGHV4-31, IGHV2-5, IGHV1OR15-1, IGHV3-23, IGHV4-34, IGHV1-2, IGHV3-48, IGHV3-49, CD79B, IGLC3, CTLA4, CD38, TRDC, IGLC2, IGHV3-7, IGHV4-61, IGHV3-30, SYK, IGHV3-53, IGLC7, PRKCB, IGHV3-11, IGLC6, IGHV4-28, IGHV1-18, IGLL5, KLHL6, LCK	1566	137	19462	2.7214251754901135	0.00570206	0.00114367	0.00114181
GOTERM_CC_DIRECT	GO:0042571~immunoglobulin complex, circulating	23	1.2092534174553102	2.2316942855864997E-6	IGHV2-70, IGHV4-61, IGHM, IGHV4-31, IGHV2-5, IGHV3-30, IGLC7, IGHV3-53, IGHV1OR15-1, IGHV3-11, IGHV4-34, IGLC6, IGHV3-23, IGHV1-2, IGHV3-48, IGHV4-28, IGHV3-49, IGHV1-18, IGLL5, IGLC3, TRDC, IGLC2, IGHV3-7	1642	92	20660	3.145554202192448	0.00203324	4.070610376909776E-4	4.0215131026268724E-4
REACTOME_PATHWAY	R-HSA-69278~Cell Cycle, Mitotic	85	4.468980021030494	3.346606844166901E-6	FEN1, GMNN, FOXM1, CDC20, PPP1CB, PSMD9, CCND2, PTTG1, PSMD4, TUBB1, MYBL2, TK1, GTSE1, LBR, YWHAG, RFC4, CSNK2A1, PRKCB, HAUS3, PPP2R5D, HAUS5, TUBG1, SIRT2, RBX1, PSMA3, DBF4, CCNE2, CCNE1, PSMA2, AKAP9, MCM3, PSME1, CHMP3, BIRC5, CHMP4A, KIF2C, KIF20A, MCM6, MCM2, PCNA, LIN37, VPS4A, CDCA8, HMMR, PKMYT1, NCAPH, ANAPC11, SKA2, PPP2CA, POLD3, CCNB2, POLD4, PSMB4, DSN1, CDC45, ORC1, HAUS8, PSMB3,…	1011	560	11009	1.652827822523668	0.00578289	0.0020612	0.0020053
REACTOME_PATHWAY	R-HSA-453279~Mitotic G1 phase and G1/S transition	33	1.7350157728706623	3.830740579334432E-6	PCNA, LIN37, GMNN, PPP2CA, PSMD9, PSMB4, CDC45, CCND2, ORC1, PSMD4, PSMB3, E2F1, E2F2, MYBL2, PSMF1, TK1, CDT1, CDKN2C, POLA2, PSMA3, DBF4, CDK6, PSMC3, CCNE2, CCNE1, PSMC4, PSMA2, CDK4, PSMC1, MCM3, PSME1, MCM6, MCM2	1011	149	11009	2.411706131878199	0.0066167	0.0020612	0.0020053
GOTERM_MF_DIRECT	GO:0005178~integrin binding	32	1.6824395373291272	4.310638870594141E-6	SEMA7A, CD151, TNXB, LAMA3, ICAM2, CIB2, FBLN1, DMP1, THY1, ITGAE, ICAM5, ITGAL, FGF2, THBS1, ICAM1, COMP, GPNMB, TSPAN4, SPP1, ITGB7, S1PR2, VCAM1, SYK, FN1, ISG15, COL3A1, MMP14, ADAM15, ITGA11, CD9, P4HB, PPIA	1539	160	18976	2.4660168940870695	0.00619668	0.00205228	0.00204943
REACTOME_PATHWAY	R-HSA-1474244~Extracellular matrix organization	53	2.786540483701367	4.757534029247996E-6	SPARC, ICAM2, DMP1, ICAM5, ITGAE, ITGAL, FGF2, HAPLN1, ICAM1, COMP, MMP24, TIMP2, ITGB7, CTSB, FGA, MMP1, MMP2, COL23A1, MMP11, MMP14, ADAM15, LOX, MMP15, COL4A5, COL8A1, ADAM8, PPIB, PLEC, CD151, TNXB, SDC4, SDC2, LAMA3, FBLN1, PLG, THBS1, FBLN2, LTBP1, SPP1, SERPINH1, COL28A1, VCAM1, FN1, BMP7, MFAP5, COL1A1, COL3A1, CAPN12, COL1A2, MFAP2, ITGA11, SDC1, P4HB	1011	300	11009	1.9237619518628422	0.00821093	0.0020612	0.0020053
GOTERM_MF_DIRECT	GO:0005201~extracellular matrix structural constituent	29	1.5247108307045216	5.69287128599903E-6	SPON1, SPARC, TNXB, LAMA3, FBLN1, PRELP, THBS2, THBS1, LTBP1, FBLN2, COMP, ZPLD1, TECTA, COL28A1, FGA, COL23A1, FN1, MUC5B, MUC5AC, MFAP5, COL1A1, COL3A1, CD4, COL1A2, MFAP2, COL4A5, COL8A1, VWA1, CHI3L1	1539	139	18976	2.5724636664937055	0.00817554	0.00205228	0.00204943
KEGG_PATHWAY	hsa04110:Cell cycle	33	1.7350157728706623	7.014219621382946E-6	PCNA, TTK, PKMYT1, ANAPC11, PPP2CA, CDC20, CCNB2, CDC45, CCND2, ORC1, PTTG1, E2F1, E2F2, SFN, BUB1, YWHAG, CDT1, CDKN2C, GADD45B, ATRX, PLK1, MAD2L1BP, PPP2R5D, YWHAZ, RBX1, DBF4, CDK6, CCNE2, CCNE1, CDK4, MCM3, MCM6, MCM2	770	157	8586	2.343767060964513	0.002375	0.00237782	0.00227261
SMART	SM00409:IG	73	3.838065194532071	7.168537284745762E-6	PIGR, IGHM, CD84, CD83, FLT4, PTPRM, ICAM5, MYPN, IGKV3D-15, SIRPB1, IGLV8-61, HAPLN1, ICAM1, IGLV2-8, FCGR3A, IL18RAP, IGKV1-16, IGKV1-17, VSIG2, IGKV1-12, CTLA4, PTGFRN, B2M, IL6R, CDON, CD96, LAG3, MYBPC2, DCC, IGKV3D-20, IGFN1, IGLV4-69, IGKV2D-29, IGKV1-27, IGLV3-10, MXRA8, IGKV4-1, CD48, CD101, IGLV3-19, IGSF1, IGLV3-1, TAPBPL, IGLV2-11, IGSF22, CD79B, IGLV3-25, IGLV1-40, IGLV3-27, IGLV1-47…	842	529	10366	1.698894072534114	0.00270605	0.00135485	0.00135485
GOTERM_CC_DIRECT	GO:0005615~extracellular space	211	11.093585699263933	7.45903151541153E-6	SPON1, SPARC, TFRC, IGHV3-23, ENO1, ACTB, IGLV8-61, ICAM1, IGLV2-8, IGKV1-16, IGKV1-17, DPYSL3, IGKV1-12, LGALS9, B2M, IL15RA, IGHV3-30, KRT2, ENTPD5, COL23A1, HLA-C, MIF, IGKV2D-29, IGKV1-27, IGKV4-1, SERPING1, COL8A1, PLA1A, MIR454, PRDX5, BLOC1S1, PRDX1, SERPINH1, HMOX1, SFN, APOD, APOE, CD14, S100A11, SPTBN2, S100A10, IGKV2D-40, FN1, LYZ, CP, PRDX6, VASN, COL1A1, COL1A2, IGKV1D-8, HLA-DRB1, P…	1642	1989	20660	1.3347650812722103	0.00677958	0.00113377	0.0011201
REACTOME_PATHWAY	R-HSA-69242~S Phase	34	1.7875920084121977	9.010369411486674E-6	FEN1, PCNA, LIN37, GMNN, ANAPC11, POLD3, POLD4, PSMD9, PSMB4, CDC45, ORC1, PSMD4, PSMB3, POLD1, E2F1, PSMF1, CDT1, RFC4, UBE2C, RBX1, POLA2, PSMA3, PSMC3, CCNE2, CCNE1, PSMC4, UBE2S, PSMA2, CDK4, PSMC1, MCM3, PSME1, MCM6, MCM2	1011	162	11009	2.2853915570697634	0.015493757891736126	0.00267662	0.00260402
REACTOME_PATHWAY	R-HSA-1280215~Cytokine Signaling in Immune system	109	5.7308096740273395	9.266989221073286E-6	IFITM3, IFITM1, IFITM2, IFIT5, UBE2L6, IRS2, SLA2, FGF2, ICAM1, IL27RA, HERC5, RPS6KA3, PSMD9, IL18RAP, PSMD4, CFL1, TUBB1, TRIM25, TNFRSF8, MAP3K8, LGALS9, B2M, TRIM21, IL6R, TRIM22, IL15RA, RSAD2, HLA-C, MIF, MID1, RBX1, SIGIRR, IFI27, PSME1, PPIA, UBA7, BOLA2B, CNN2, IRAK2, HMOX1, PSMF1, MAP2K6, STAT5A, HLA-DRB5, UBE2I, VCAM1, FANCM, FN1, FANCA, IFNLR1, ISG15, BST2, CXCL10, COL1A2, CD27, SDC1,…	1011	787	11009	1.5081636936519127	0.015931496261968325	0.00267662	0.00260402
GOTERM_MF_DIRECT	GO:0034987~immunoglobulin receptor binding	23	1.2092534174553102	9.27877158471131E-6	IGHV2-70, IGHV4-61, IGHM, IGHV4-31, IGHV2-5, IGHV3-30, IGLC7, IGHV3-53, IGHV1OR15-1, IGHV3-11, IGHV4-34, IGLC6, IGHV3-23, IGHV1-2, IGHV3-48, IGHV4-28, IGHV3-49, IGHV1-18, IGLL5, IGLC3, TRDC, IGLC2, IGHV3-7	1539	98	18976	2.893795334898092	0.013290935719227015	0.002676	0.00267229
GOTERM_BP_DIRECT	GO:0050871~positive regulation of B cell activation	23	1.2092534174553102	9.75247725208086E-6	IGHV2-70, IGHV4-61, IGHM, IGHV4-31, IGHV2-5, IGHV3-30, IGLC7, IGHV3-53, IGHV1OR15-1, IGHV3-11, IGHV4-34, IGLC6, IGHV3-23, IGHV1-2, IGHV3-48, IGHV4-28, IGHV3-49, IGHV1-18, IGLL5, IGLC3, TRDC, IGLC2, IGHV3-7	1566	99	19462	2.887276339383619	0.046700717048087204	0.00797102	0.00795802
UP_SEQ_FEATURE	REGION:Complementarity-determining-3	9	0.47318611987381703	1.0780671444068477E-5	IGLV6-57, IGKV1-16, IGKV1-5, IGKV4-1, IGKV1-33, IGLV7-43, IGKV3-11, IGKV3-20, IGKV2-30	1627	16	20583	7.116126306084818	0.059955	0.00883245	0.00883245
GOTERM_BP_DIRECT	GO:0006910~phagocytosis, recognition	23	1.2092534174553102	1.1565269428435134E-5	IGHV2-70, IGHV4-61, IGHM, IGHV4-31, IGHV2-5, IGHV3-30, IGLC7, IGHV3-53, IGHV1OR15-1, IGHV3-11, IGHV4-34, IGLC6, IGHV3-23, IGHV1-2, IGHV3-48, IGHV4-28, IGHV3-49, IGHV1-18, IGLL5, IGLC3, TRDC, IGLC2, IGHV3-7	1566	100	19462	2.858403575989783	0.055138	0.0081023	0.00808908
GOTERM_BP_DIRECT	GO:0006911~phagocytosis, engulfment	25	1.3144058885383807	1.4261224728736796E-5	IGHV2-70, IGHM, IGHV4-31, IGHV2-5, IGHV1OR15-1, IGHV3-23, IGHV4-34, IGHV1-2, IGHV3-48, IGHV3-49, IGLC3, TRDC, IGLC2, IGHV3-7, IGHV4-61, IGHV3-30, IGHV3-53, IGLC7, IGHV3-11, IGLC6, IGHV4-28, ARHGAP25, IGHV1-18, IGLL5, FCGR2B	1566	116	19462	2.6784141454177126	0.0675479	0.00874213	0.00872787
INTERPRO	IPR003599:Immunoglobulin subtype	73	3.838065194532071	1.6127891070818528E-5	PIGR, IGHM, CD84, CD83, FLT4, PTPRM, ICAM5, MYPN, IGKV3D-15, SIRPB1, IGLV8-61, HAPLN1, ICAM1, IGLV2-8, FCGR3A, IL18RAP, IGKV1-16, IGKV1-17, VSIG2, IGKV1-12, CTLA4, PTGFRN, B2M, IL6R, CDON, CD96, LAG3, MYBPC2, DCC, IGKV3D-20, IGFN1, IGLV4-69, IGKV2D-29, IGKV1-27, IGLV3-10, MXRA8, IGKV4-1, CD48, CD101, IGLV3-19, IGSF1, IGLV3-1, TAPBPL, IGLV2-11, IGSF22, CD79B, IGLV3-25, IGLV1-40, IGLV3-27, IGLV1-47…	1577	529	19129	1.673893264831288	0.0324126	0.00823732	0.00823732
REACTOME_PATHWAY	R-HSA-69052~Switching of origins to a post-replicative state	23	1.2092534174553102	1.7767910644664877E-5	CDT1, UBE2C, GMNN, ANAPC11, RBX1, PSMD9, PSMA3, PSMB4, ORC1, PSMC3, CCNE2, PSMD4, CCNE1, PSMC4, UBE2S, PSMA2, PSMB3, PSMC1, MCM3, PSME1, MCM6, PSMF1, MCM2	1011	91	11009	2.752220084564298	0.0303228	0.00439883	0.00427953
GOTERM_CC_DIRECT	GO:0031012~extracellular matrix	41	2.155625657202944	3.747538355446387E-5	SPON1, TNXB, CRISP3, FBLN1, DMP1, PRELP, LRRC32, THBS1, LTBP1, FBLN2, HAPLN1, COMP, MMP24, RELN, SPOCK2, TIMP2, APOE, TIMP4, TECTA, COL28A1, MMP1, MMP2, RARRES2, COL23A1, WNT5A, FN1, RTN4RL2, MUC5B, MUC5AC, VASN, ADAMTS20, COL1A1, MMP11, COL3A1, MMP14, COL1A2, LOX, MMP15, COL4A5, COL8A1, CHI3L1	1642	259	20660	1.991779494824562	0.033600713613162414	0.00488251	0.00482362
UP_KW_CELLULAR_COMPONENT	KW-0964~Secreted	227	11.934805467928495	3.990755037287627E-5	SPON1, SPARC, TFRC, IGHV3-23, DMP1, IGLV8-61, IGLV2-8, IL4I1, ISLR, IGKV1-16, IGKV1-17, IGKV1-12, LGALS9, IGHV3-7, B2M, IL15RA, ST6GAL1, IGHV3-30, ENTPD5, MIF, RNASE1, IGKV2D-29, FNDC1, IGKV1-27, IGKV4-1, SERPING1, COL8A1, FREM1, PLA1A, C5ORF46, SDC4, IGSF1, PLA2G7, SFN, APOD, APOE, CD14, ICOS, IGKV2D-40, IGHV3-11, FN1, LYZ, CP, VASN, COL1A1, COL1A2, IGKV1D-8, SDC1, PIGR, LAD1, IGHM, PTPRR, CD40,…	1461	2160	17831	1.2826187669531268	0.00239164	0.00119723	0.00109746
REACTOME_PATHWAY	R-HSA-69206~G1/S Transition	28	1.4721345951629863	4.644055353341965E-5	PCNA, LIN37, GMNN, PPP2CA, PSMD9, PSMB4, CDC45, ORC1, PSMD4, PSMB3, E2F1, PSMF1, TK1, CDT1, POLA2, PSMA3, DBF4, PSMC3, CCNE2, CCNE1, PSMC4, PSMA2, CDK4, PSMC1, MCM3, PSME1, MCM6, MCM2	1011	131	11009	2.327466570019858	0.0773297	0.00974265	0.00947842
REACTOME_PATHWAY	R-HSA-1640170~Cell Cycle	95	4.9947423764458465	5.059656382130625E-5	FEN1, GMNN, FOXM1, CDC20, PPP1CB, PSMD9, CCND2, PTTG1, PSMD4, TUBB1, MYBL2, TK1, GTSE1, LBR, YWHAG, SUN2, RFC4, CSNK2A1, PRKCB, ATRX, HAUS3, PPP2R5D, HAUS5, TUBG1, YWHAZ, SIRT2, RBX1, PSMA3, DBF4, CCNE2, CCNE1, PSMA2, AKAP9, MCM3, PSME1, CHMP3, BIRC5, CHMP4A, KIF2C, KIF20A, MCM6, MCM2, PCNA, LIN37, VPS4A, CDCA8, HMMR, PKMYT1, NCAPH, ANAPC11, SKA2, PPP2CA, POLD3, CCNB2, POLD4, PSMB4, DSN1, CDC45, …	1011	691	11009	1.4970705739041312	0.0839516	0.00974265	0.00947842
UP_KW_BIOLOGICAL_PROCESS	KW-0131~Cell cycle	90	4.73186	5.332657705977868E-5	MAP10, GMNN, CLTA, IKZF1, FOXM1, ING4, SMPD3, CDC20, PPP1CB, RPS6KA3, CHAF1B, CCND2, PTTG1, MAP3K8, PELO, TRIM21, DLGAP5, USP8, CSNK2A1, LIG4, HAUS3, HAUS5, SIRT2, MLF1, DBF4, PSRC1, DMTF1, CCNE2, SAPCD2, CCNE1, KIFC1, MCM3, TXNIP, CHMP3, BIRC5, MAPRE3, FAM32A, KIF2C, MCM6, ARL8A, MCM2, CDC123, RGS14, UHRF1, PRCC, VPS4A, CDCA7, KATNB1, CDCA8, PKMYT1, NCAPH, ANAPC11, SKA2, CCNB2, DSN1, CDC45, HAUS…	980	689	11376	1.5163057966292468	0.00796729	0.00266633	0.00257745
GOTERM_BP_DIRECT	GO:0009615~response to virus	23	1.2092534174553102	5.5153403234662415E-5	IFITM3, IFITM1, IFITM2, RSAD2, MX2, MX1, CXCR4, ISG15, MST1R, AUP1, ENO1, OASL, BST2, ACTA2, CCL8, CDK6, OAS2, PSMA2, OAS3, CFL1, IRF7, IKBKG, TRIM22	1566	110	19462	2.5985487054452574	0.23698664797309754	0.028969185717161606	0.028921927665420726
GOTERM_BP_DIRECT	GO:0006958~complement activation, classical pathway	25	1.3144058885383807	5.907256467610442E-5	IGHV2-70, IGHM, IGHV4-31, IGHV2-5, IGHV1OR15-1, IGHV3-23, IGHV4-34, IGHV1-2, IGHV3-48, IGHV3-49, IGLC3, TRDC, IGLC2, IGHV3-7, IGHV4-61, IGHV3-30, IGHV3-53, IGLC7, IGHV3-11, IGLC6, IGHV4-28, IGHV1-18, IGLL5, SERPING1, C1QC	1566	126	19462	2.4658415941940848	0.25151222949675245	0.028969185717161606	0.028921927665420726
GOTERM_BP_DIRECT	GO:0045087~innate immune response	80	4.206098843322819	6.591797620301517E-5	IGHM, CD84, IGHV4-31, IGHV1OR15-1, CRISP3, IGHV3-23, IGHV1-2, IGHV4-34, IFIT5, UBE2L6, OASL, PYCARD, HERC5, IGLC3, TRIM25, IKBKG, IGLC2, IGHV3-7, B2M, TRIM21, TRIM22, ZBP1, FGA, RBM14, IGHV3-30, RSAD2, SYK, HLA-C, TRAF2, MIF, SIRT2, IGHV1-18, AIM2, ADAM15, IFI27, OAS2, LCK, OAS3, IRF7, SERPING1, TRIM59, RNF166, NAIP, IGHV2-70, IGHV2-5, UBA7, IGHV3-48, MST1R, IGHV3-49, NPY, SLAMF6, TRDC, CD14, KLR…	1566	635	19462	1.5657123319355195	0.276223	0.029387432299962397	0.0293395
UP_KW_PTM	KW-0873~Pyrrolidone carboxylic acid	23	1.2092534174553102	6.667602197045437E-5	IGHV2-70, CCL13, IGHV2-5, IGHV3-30, AMY2B, IGHV3-11, IGHV1-2, FN1, THY1, IGLV2-11, IGLV2-8, COL1A1, CCL8, IGLV1-40, COL1A2, IGLV1-47, IGLV2-14, IGLV2-23, MFAP2, CCL2, IGLV2-18, APOD, B2M	1256	102	14201	2.5495113650555763	0.00206489	0.00213363	0.00206696
GOTERM_BP_DIRECT	GO:0046598~positive regulation of viral entry into host cell	8	0.4206098843322818	7.747251271061235E-5	CD74, CD4, TMPRSS4, TMPRSS2, P4HB, LGALS9, TRIM21, HLA-DRB1	1566	15	19462	6.62818	0.31609750314149154	0.0316604	0.0316088
UP_KW_BIOLOGICAL_PROCESS	KW-0051~Antiviral defense	27	1.4195583596214512	8.258872044142535E-5	IFITM3, IFITM1, IFITM2, IFIT5, OASL, HERC5, TRIM25, TRIM22, ZBP1, APOBEC3D, RSAD2, APOBEC3H, MX2, MX1, ISG15, IFNLR1, PML, BST2, IFI27, OAS2, OAS3, TTC4, DDIT4, IRF7, POLR3G, SERINC3, MYD88	980	136	11376	2.304561824729892	0.012312394168116136	0.00309708	0.00299384
GOTERM_CC_DIRECT	GO:0005576~extracellular region	224	11.77707676130389	8.358396582475984E-5	SPARC, TFRC, GMFG, IGHV3-23, DMP1, IGLV2-8, IL4I1, ISLR, IGKV1-16, IGKV1-17, IGKV1-12, IGHV3-7, B2M, GOLGA7, ST6GAL1, IGHV3-30, ENTPD5, MIF, UNC13D, FNDC1, IGKV4-1, SERPING1, COL8A1, PADI2, TAGLN2, FREM1, PLA1A, IGSF1, THY1, PLA2G7, DSN1, PRDX4, COMMD9, APOD, APOE, CD14, ICOS, S100A11, S100A10, CTSA, JUP, IGKV2D-40, IGHV3-11, FN1, LYZ, CP, PRDX6, COL1A1, COL1A2, CD27, SPAG16, LAD1, PRSS27, MTRNR2…	1642	2213	20660	1.2735727813666669	0.0733986	0.00857879	0.00847532
GOTERM_CC_DIRECT	GO:0005886~plasma membrane	500	26.28811777076761	8.46591037067383E-5	TFRC, FRMPD1, IGHV3-23, MRGPRF, ENO1, SLA2, GPR176, RNF114, SYNGAP1, IGKV1-16, IGKV1-17, GJA5, IGKV1-12, IGHV3-7, IGHV3-30, CSNK2A1, PRKCB, COL23A1, SYTL1, PHKA1, SYTL2, SIGIRR, AR, IGKV1-27, ERVW-1, TMEM126A, PRKCQ, VPS28, ZNF397, CLCNKA, SLC5A1, TAPBPL, THY1, CYB5R1, RIC8B, SLC19A3, ICOS, RHBDL1, S100A10, HLA-DRB5, JUP, IGHV3-11, FN1, FZD8, CP, SLC16A13, GRIN2D, NMT2, HLA-DRB1, CDC42SE2, PIGR, …	1642	5458	20660	1.1526398688869361	0.0743068	0.00857879	0.00847532
REACTOME_PATHWAY	R-HSA-168256~Immune System	235	12.355415352260778	9.49162730096548E-5	IFITM3, IFITM1, IFITM2, GMFG, IFIT5, ICAM2, UBE2L6, ICAM5, SLA2, ACTB, IL27RA, ICAM1, CDC20, HERC5, RPS6KA3, PSMD9, RNF114, PSMD4, TBC1D10C, TRIM25, CPNE3, LGALS9, B2M, TRIM21, GOLGA7, TRIM22, IL15RA, RSAD2, PRKCB, HLA-C, MIF, UNC13D, SIGIRR, IFI27, PSME1, SERPING1, TXNIP, PADI2, PRKCQ, KIF20A, CD101, ANAPC11, CD79B, DSN1, PRDX4, COMMD9, RACGAP1, HMOX1, SLAMF7, SLAMF6, PSMF1, CD14, ICOS, PAG1, S1…	1011	2054	11009	1.2458453602389297	0.1516802987123982	0.016448990112573177	0.016002883629427797
REACTOME_PATHWAY	R-HSA-9711123~Cellular response to chemical stress	38	1.9978969505783386	1.2770163027818858E-4	PRKAA2, SRXN1, TACO1, HM13, COX4I1, COX5B, COX6A1, COX5A, PSMD9, PRDX5, PSMB4, PSMD4, PSMB3, PRDX1, CCL2, HMOX1, PSMF1, TRIM21, NQO1, G6PD, GPX1, CSNK2A1, PRDX6, SOD1, RBX1, COX6B1, GCLC, PSMA3, CCS, PSMC3, PSMC4, PSMA2, PSMC1, PSME1, TXNIP, BLVRB, MAFK, P4HB	1011	215	11009	1.9246060773353577	0.19854067522933438	0.0201188	0.019573177149911452
UP_KW_CELLULAR_COMPONENT	KW-0272~Extracellular matrix	42	2.2082018927444795	1.6563464419025285E-4	LGALS3BP, LAD1, SPON1, SPARC, TNXB, LAMA3, FBLN1, DMP1, PRELP, THBS1, LTBP1, FBLN2, COCH, HAPLN1, COMP, PODNL1, MMP24, RELN, SPOCK2, ZPLD1, APOE, WNT2, TECTA, COL28A1, MMP1, MMP2, WNT5A, FN1, ADAMTS20, MLF2, MFAP5, COL1A1, MMP11, COL3A1, COL1A2, MFAP2, TFF3, COL4A5, COL8A1, VWA1, ANGPTL4, FREM1	1461	278	17831	1.8438686422525223	0.00988967	0.00331269	0.00303664
GOTERM_BP_DIRECT	GO:0034341~response to interferon-gamma	10	0.5257623554153523	1.6968167109516835E-4	IFITM3, BST2, CD74, IFITM1, CD40, IFITM2, KYNU, TRIM21, SNCA, CXCL16	1566	27	19462	4.602904309162292	0.5649044081700625	0.0640091	0.0639047
REACTOME_PATHWAY	R-HSA-449147~Signaling by Interleukins	68	3.5751840168243953	1.9514051871758788E-4	ARF1, IRS2, FASLG, FGF2, ICAM1, IL27RA, RPS6KA3, PSMD9, IL18RAP, PSMD4, CFL1, MAP3K8, IKBKG, LGALS9, CCR5, IL6R, DUSP4, IL15RA, SYK, MMP1, MMP2, TRAF2, PPP2R5D, MIF, IL17RC, YWHAZ, DUSP7, RBX1, SIGIRR, PSMA3, PSMA2, IRF4, LCK, PSME1, BIRC5, PPIA, IL2RG, USP18, BOLA2B, PPP2CA, CNN2, PSMB4, PSMB3, IRAK2, IL21R, STAT4, CCL2, HMOX1, PSMF1, MAP2K6, IL32, STAT5A, VCAM1, FN1, IFNLR1, SOD1, CXCL10, CD4, …	1011	473	11009	1.5654690581196689	0.28695555078548163	0.028181543244798313	0.027417242879821096
KEGG_PATHWAY	hsa03250:Viral life cycle - HIV-1	16	0.8412197686645636	3.4168936522151807E-4	APOBEC3D, APOBEC3H, MX2, VPS4A, MX1, SUPT4H1, CXCR4, BST2, CD4, HGS, NELFB, CHMP4A, SERINC3, CCR5, PPIA, RAN	770	63	8586	2.8319109461966603	0.10939341187307827	0.044659895777765295	0.042683794194678326
REACTOME_PATHWAY	R-HSA-68882~Mitotic Anaphase	39	2.050473186119874	3.845621450667077E-4	VPS4A, CDCA8, ANAPC11, SKA2, PPP2CA, CDC20, PSMD9, CCNB2, DSN1, PSMB4, PSMD4, PTTG1, PSMB3, TUBB1, PSMF1, LBR, BUB1, CENPT, UBE2I, UBE2C, RCC2, PLK1, PPP2R5D, SIRT2, ZWINT, PSMA3, PSMC3, CENPH, PSMC4, UBE2S, PSMA2, PSMC1, PSME1, CHMP3, BIRC5, CHMP4A, KIF2C, SPC24, RAN	1011	235	11009	1.8071469158406464	0.48653549478893365	0.041838160071542625	0.040703484062677944
REACTOME_PATHWAY	R-HSA-198933~Immunoregulatory interactions between a Lymphoid and a non-Lymphoid cell	26	1.3669821240799158	3.974778778608014E-4	IFITM1, CD40, ICAM2, ICAM5, CD3E, ITGAL, ICAM1, FCGR3A, SLAMF7, SLAMF6, ITGB7, KLRC1, B2M, MICB, CD96, VCAM1, CRTAM, HLA-C, PILRB, COL1A1, COL3A1, COL1A2, SELL, KLRD1, FCGR2B, HCST	1011	133	11009	2.1287194246744456	0.497905	0.041838160071542625	0.040703484062677944
REACTOME_PATHWAY	R-HSA-69190~DNA strand elongation	11	0.5783385909568874	3.9824540089593335E-4	POLD3, POLD4, POLA2, FEN1, RFC4, PCNA, CDC45, POLD1, MCM3, MCM6, MCM2	1011	32	11009	3.7431688921859543	0.49857274785426065	0.041838160071542625	0.040703484062677944
REACTOME_PATHWAY	R-HSA-2555396~Mitotic Metaphase and Anaphase	39	2.050473186119874	4.189876970919895E-4	VPS4A, CDCA8, ANAPC11, SKA2, PPP2CA, CDC20, PSMD9, CCNB2, DSN1, PSMB4, PSMD4, PTTG1, PSMB3, TUBB1, PSMF1, LBR, BUB1, CENPT, UBE2I, UBE2C, RCC2, PLK1, PPP2R5D, SIRT2, ZWINT, PSMA3, PSMC3, CENPH, PSMC4, UBE2S, PSMA2, PSMC1, PSME1, CHMP3, BIRC5, CHMP4A, KIF2C, SPC24, RAN	1011	236	11009	1.799489513654881	0.5162842490607249	0.041838160071542625	0.040703484062677944
REACTOME_PATHWAY	R-HSA-9759194~Nuclear events mediated by NFE2L2	21	1.1041009463722398	4.301168413341693E-4	NQO1, G6PD, PRKAA2, SRXN1, RBX1, PSMD9, GCLC, PSMA3, PSMB4, PSMC3, PSMD4, PSMC4, PSMA2, PSMB3, PSMC1, PRDX1, PSME1, CCL2, HMOX1, MAFK, PSMF1	1011	97	11009	2.3574596959221754	0.525528	0.041838160071542625	0.040703484062677944
REACTOME_PATHWAY	R-HSA-1236974~ER-Phagosome pathway	20	1.0515247108307046	4.3455676935243354E-4	FGA, HLA-C, SEC61A1, PSMD9, PSMA3, PSMB4, PSMC3, PSMD4, PSMC4, PSMA2, PSMB3, PSMC1, SEC61G, PSME1, CD14, IKBKG, SEC61B, PSMF1, B2M, MYD88	1011	90	11009	2.419826354544455	0.5291664093933212	0.041838160071542625	0.040703484062677944
GOTERM_CC_DIRECT	GO:0042470~melanosome	20	1.0515247108307046	4.392182298039966E-4	PMEL, RAB5C, TFRC, SLC2A1, SYTL1, GGH, SLC3A2, YWHAZ, PDIA6, SYTL2, RAB32, GNA13, MMP14, DNAJC5, PRDX1, P4HB, APOE, PPIB, RAN, CTSB	1642	103	20660	2.4431488949067557	0.33011888290848523	0.0400567	0.0395736
KEGG_PATHWAY	hsa05169:Epstein-Barr virus infection	34	1.7875920084121977	4.7806408169481925E-4	CD40, CD3E, ITGAL, ICAM1, CCND2, PSMD4, E2F1, E2F2, BAK1, IKBKG, IKBKE, B2M, MAP2K6, HLA-DRB5, SYK, GADD45B, HLA-C, TRAF2, ISG15, RUNX3, CXCL10, CDK6, PSMC3, CCNE2, CCNE1, PSMC4, OAS2, CDK4, PSMC1, OAS3, IRF7, NFKBIE, MYD88, HLA-DRB1	770	202	8586	1.876841969911277	0.14964593950458016	0.044659895777765295	0.042683794194678326
KEGG_PATHWAY	hsa05016:Huntington disease	46	2.4185068349106205	5.583746568991633E-4	GRIA2, HIP1, NDUFB7, DNAH7, NDUFB10, NDUFA12, COX4I1, NDUFB3, DNAH6, CLTA, DNAH9, UQCR10, COX5B, COX6A1, COX5A, UQCRH, PSMD9, KLC3, PSMB4, PSMD4, PSMB3, POLR2C, TUBB1, KIF5A, AP2S1, POLR2J, GRIA3, NDUFA9, NDUFA7, KCNJ10, GPX1, NDUFA5, NDUFA1, TRAF2, SOD1, COX6B1, PLCB3, PSMA3, PSMC3, PSMC4, UQCRQ, PSMA2, PSMC1, NDUFS5, NDUFAB1, SLC25A5	770	306	8586	1.6762414056531705	0.17249644482983428	0.044659895777765295	0.042683794194678326
REACTOME_PATHWAY	R-HSA-68949~Orc1 removal from chromatin	17	0.8937960042060988	5.6627874510561E-4	CDT1, RBX1, PSMD9, PSMA3, PSMB4, ORC1, PSMC3, PSMD4, PSMC4, PSMA2, PSMB3, PSMC1, MCM3, PSME1, MCM6, PSMF1, MCM2	1011	71	11009	2.6072776918683216	0.6253035442647654	0.0507729	0.049395906636212204
REACTOME_PATHWAY	R-HSA-216083~Integrin cell surface interactions	19	0.9989484752891693	5.859538153761828E-4	FGA, VCAM1, COL23A1, ICAM2, FN1, ITGAE, ICAM5, ITGAL, THBS1, ICAM1, COL1A1, COMP, COL3A1, COL1A2, ITGA11, SPP1, COL4A5, COL8A1, ITGB7	1011	85	11009	2.4340606272182463	0.6378712922394254	0.0507729	0.049395906636212204
KEGG_PATHWAY	hsa05012:Parkinson disease	41	2.155625657202944	7.212216600857157E-4	NDUFB7, UBA7, MAOB, NDUFB10, NDUFA12, COX4I1, NDUFB3, UBE2L6, UQCR10, COX5B, COX6A1, COX5A, UQCRH, PSMD9, UCHL1, KLC3, PSMB4, PSMD4, PSMB3, TUBB1, KIF5A, SLC39A1, CAMK2G, SLC18A2, SNCA, NDUFA9, NDUFA7, NDUFA5, NDUFA1, SLC39A14, SOD1, COX6B1, PSMA3, PSMC3, PSMC4, UQCRQ, PSMA2, PSMC1, NDUFS5, NDUFAB1, SLC25A5	770	266	8586	1.7187091104384336	0.2169684988288707	0.044659895777765295	0.042683794194678326
REACTOME_PATHWAY	R-HSA-69306~DNA Replication	32	1.6824395373291272	7.664012808220561E-4	FEN1, PCNA, GMNN, ANAPC11, POLD3, POLD4, PSMD9, PSMB4, CDC45, ORC1, PSMD4, PSMB3, POLD1, PSMF1, CDT1, RFC4, UBE2C, RBX1, POLA2, PSMA3, DBF4, PSMC3, CCNE2, CCNE1, PSMC4, UBE2S, PSMA2, PSMC1, MCM3, PSME1, MCM6, MCM2	1011	186	11009	1.873413951905385	0.7351740964852322	0.0600993	0.058469376830116174
REACTOME_PATHWAY	R-HSA-174178~APC/C:Cdh1 mediated degradation of Cdc20 and other APC/C:Cdh1 targeted proteins in late mitosis/early G1	17	0.8937960042060988	7.832677704394528E-4	UBE2C, PLK1, ANAPC11, CDC20, PSMD9, PSMA3, PSMB4, PSMC3, PSMD4, PTTG1, PSMC4, UBE2S, PSMA2, PSMB3, PSMC1, PSME1, PSMF1	1011	73	11009	2.5358454263376826	0.7428086526636825	0.0600993	0.058469376830116174
REACTOME_PATHWAY	R-HSA-913531~Interferon Signaling	42	2.2082018927444795	7.976249508260214E-4	IFITM3, IFITM1, IFITM2, UBA7, IFIT5, UBE2L6, USP18, ICAM1, OASL, PPP2CA, HERC5, TUBB1, TRIM46, TRIM25, IKBKG, TRIM21, CAMK2G, B2M, GBP4, TRIM22, SNCA, MAP2K6, HLA-DRB5, UBE2I, VCAM1, RSAD2, FANCM, MX2, MX1, FANCA, HLA-C, ISG15, MID1, PML, DUS2, BST2, IFI27, OAS2, IRF4, OAS3, IRF7, HLA-DRB1	1011	269	11009	1.7001753940851376	0.7491338139243244	0.0600993	0.058469376830116174
REACTOME_PATHWAY	R-HSA-174154~APC/C:Cdc20 mediated degradation of Securin	16	0.8412197686645636	8.964435480582891E-4	UBE2C, ANAPC11, CDC20, PSMD9, PSMA3, PSMB4, PSMC3, PSMD4, PTTG1, PSMC4, UBE2S, PSMA2, PSMB3, PSMC1, PSME1, PSMF1	1011	67	11009	2.600410410853743	0.7886486605025228	0.0634953	0.0617733
KEGG_PATHWAY	hsa05022:Pathways of neurodegeneration - multiple diseases	64	3.3648790746582544	9.020694786285213E-4	HIP1, NDUFA12, COX4I1, ARAF, UBE2L6, FASLG, COX6A1, PSMD9, UCHL1, CASP7, MAP1LC3A, PSMD4, TUBB1, KIF5A, GPX1, CSNK2A1, PRKCB, WNT5A, TRAF2, TOMM40L, COX6B1, PSMA3, PLCB3, PSMA2, NDUFS5, SLC25A5, GRIA2, NDUFB7, UBA7, DNAH7, NDUFB10, NDUFB3, DNAH6, DERL1, DNAH9, UQCR10, COX5B, COX5A, UQCRH, PSMB4, KLC3, PSMB3, BAK1, WNT2, CAMK2G, GRIA3, SPTBN2, SNCA, MAP2K6, NDUFA9, NDUFA7, NDUFA5, NDUFA1, FZD8, GR…	770	476	8586	1.4992469715158792	0.2635688744819238	0.044659895777765295	0.042683794194678326
REACTOME_PATHWAY	R-HSA-1280218~Adaptive Immune System	97	5.099894847528917	9.159739723485143E-4	IFITM1, ICAM2, UBE2L6, ICAM5, ICAM1, CDC20, HERC5, PSMD9, RNF114, PSMD4, TUBB1, KIF5A, MAP3K8, B2M, TRIM21, CD96, LAG3, FBXW10, PRKCB, FBXW9, HLA-C, RBX1, PSME1, PRKCQ, KIF20A, PPIA, CD101, UBA7, DAPP1, FBXO44, ANAPC11, CD79B, KLC3, RACGAP1, SLAMF7, SLAMF6, PSMF1, CD14, KLRC1, ICOS, PAG1, SPTBN2, AP1M1, CTSA, HLA-DRB5, VCAM1, UBE2C, CRTAM, PILRB, COL1A1, COL1A2, SELL, UBE2S, KLRD1, NFKBIE, MYD88,…	1011	768	11009	1.375330994477415	0.7956886736774632	0.0634953	0.0617733
KEGG_PATHWAY	hsa03030:DNA replication	11	0.5783385909568874	9.221807387739145E-4	POLD3, POLD4, POLA2, FEN1, RFC4, PCNA, RNASEH2A, POLD1, MCM3, MCM6, MCM2	770	36	8586	3.407142857142857	0.26857712992932925	0.044659895777765295	0.042683794194678326
UP_KW_DOMAIN	KW-0735~Signal-anchor	59	3.1019978969505786	9.302451961135279E-4	IFITM3, PRR7, TFRC, OGFOD3, FASLG, TNFRSF13C, ECE2, TNFSF13B, CYP4Z1, APMAP, CD38, GAL3ST2, HS3ST3B1, CSGALNACT1, SUN2, CHST6, ST6GAL1, GLCE, COL23A1, ACSL5, MOGS, MANEAL, ATP1B2, POMGNT2, LAX1, CKAP4, NAALADL2, SIGIRR, ARMCX3, B3GNT7, B3GNT3, NPTXR, ST6GALNAC5, LRRC59, STOML1, TMPRSS3, TMPRSS4, TMPRSS2, SLC3A2, FUT6, DPP6, CHST11, RDH10, OTOF, ST8SIA6, KLRC1, PAG1, B4GALNT4, OST4, CD74, ST8SIA1,…	1190	470	14587	1.538768102985875	0.028438805482274954	0.014418800539759682	0.014418800539759682
REACTOME_PATHWAY	R-HSA-611105~Respiratory electron transport	21	1.1041009463722398	9.605918680796455E-4	NDUFA9, NDUFA7, NDUFB7, NDUFB10, NDUFA5, NDUFA12, TACO1, COX4I1, NDUFB3, NDUFA1, UQCR10, COX5B, COX6A1, COX5A, UQCRH, COX6B1, NDUFAF6, UQCRQ, NDUFS5, NDUFAB1, NDUFAF2	1011	103	11009	2.2201319466451555	0.8109050050031447	0.0640271	0.062290688060857004
GOTERM_BP_DIRECT	GO:0006915~apoptotic process	73	3.838065194532071	9.937459951968653E-4	HIP1, PLEKHF1, RTKN, FASLG, COMP, PYCARD, ING4, UXT, CASP7, MECOM, RASSF3, BCL7C, C19ORF12, IKBKG, CTNNBL1, ZNF443, HTATIP2, ZBP1, SRGN, SEMA6A, CSNK2A1, PRKCB, DCC, TEX11, TRAF2, EMP3, ADAMTS20, GREM1, ALDH1A3, AIM2, SMO, IFI27, DDIT4, CDIP1, TMEM219, CHMP3, BIRC5, CHI3L1, FAM32A, PPIA, NAIP, TNFRSF21, MCM2, EI24, CDCA7, CXCR4, THBS1, PPP2CA, DRAM1, MIEN1, NUAK2, CHST11, PMAIP1, CD14, BAK1, BCL2…	1566	620	19462	1.463278127961109	0.9923706558344739	0.32781650169200444	0.327282
GOTERM_BP_DIRECT	GO:0035455~response to interferon-alpha	6	0.31545741324921134	0.00102208	IFITM3, BST2, IFITM1, IFITM2, LAMP3, MX2	1566	11	19462	6.778822709857192	0.9933611849208679	0.32781650169200444	0.327282
REACTOME_PATHWAY	R-HSA-9013694~Signaling by NOTCH4	18	0.9463722397476341	0.00105993	PSENEN, FLT4, YWHAZ, RBX1, APH1A, ACTA2, PSMD9, PSMA3, PSMB4, APH1B, PSMC3, PSMD4, PSMC4, PSMA2, PSMB3, PSMC1, PSME1, PSMF1	1011	82	11009	2.390316277050011	0.8408372150166314	0.0680316	0.0661866
GOTERM_BP_DIRECT	GO:0050870~positive regulation of T cell activation	10	0.5257623554153523	0.00113639	PYCARD, HLA-DRB5, CD4, LCK, CCL2, PRKCQ, THY1, B2M, HLA-DRB1, SIRPB1	1566	34	19462	3.6552475396288786	0.9962125012046594	0.32781650169200444	0.327282
GOTERM_BP_DIRECT	GO:0010033~response to organic substance	10	0.5257623554153523	0.00113639	PPP2CA, CDK6, TRPA1, CDK4, WNT5A, XRCC3, TIMP2, XRCC1, TIMP4, SOD1	1566	34	19462	3.6552475396288786	0.9962125012046594	0.32781650169200444	0.327282
REACTOME_PATHWAY	R-HSA-453274~Mitotic G2-G2/M phases	33	1.7350157728706623	0.00118332	LIN37, HMMR, PKMYT1, FOXM1, PPP2CA, PPP1CB, PSMD9, CCNB2, PSMB4, HAUS8, PSMD4, PSMB3, TUBB1, E2F1, MYBL2, PSMF1, GTSE1, YWHAG, CEP152, PLK1, HAUS3, FBXL18, HAUS5, TUBG1, RBX1, TPX2, PSMA3, PSMC3, PSMC4, PSMA2, PSMC1, AKAP9, PSME1	1011	199	11009	1.8057498173359379	0.8715111146553962	0.0715883	0.0696468
KEGG_PATHWAY	hsa05164:Influenza A	29	1.5247108307045216	0.00120467	TMPRSS4, TMPRSS2, PLG, FASLG, ACTB, ICAM1, PYCARD, DNAJB1, CCL2, TRIM25, BAK1, IKBKG, BCL2L2-PABPN1, IKBKE, HLA-DRB5, RSAD2, PRKCB, MX2, MX1, PML, CXCL10, CDK6, OAS2, CDK4, OAS3, IRF7, SLC25A5, MYD88, HLA-DRB1	770	171	8586	1.8910457963089542	0.3354399080913466	0.051048	0.0487892
REACTOME_PATHWAY	R-HSA-69620~Cell Cycle Checkpoints	44	2.3133543638275498	0.00122208	CDCA8, PKMYT1, ANAPC11, SKA2, PPP2CA, CDC20, PSMD9, CCNB2, DSN1, PSMB4, CDC45, ORC1, PSMD4, PSMB3, SFN, PSMF1, GTSE1, BUB1, YWHAG, CENPT, RFC4, UBE2C, RCC2, PLK1, PPP2R5D, YWHAZ, ZWINT, PSMA3, DBF4, PSMC3, CCNE2, CENPH, CCNE1, PSMC4, UBE2S, PSMA2, PSMC1, MCM3, PSME1, BIRC5, KIF2C, MCM6, SPC24, MCM2	1011	292	11009	1.6408411582185005	0.8798667561277163	0.0715883	0.0696468
GOTERM_BP_DIRECT	GO:0021762~substantia nigra development	12	0.6309148264984227	0.00122935	UCHL1, G6PD, MAOB, FGF9, CCDC14, GNB4, PADI2, SYNGR3, FGF2, SIRT2, ACTB, COX6B1	1566	48	19462	3.1069604086845466	0.9976003934013302	0.3318457632322061	0.33130441614699857
REACTOME_PATHWAY	R-HSA-176814~Activation of APC/C and APC/C:Cdc20 mediated degradation of mitotic proteins	17	0.8937960042060988	0.00123927	UBE2C, PLK1, ANAPC11, CDC20, PSMD9, PSMA3, PSMB4, PSMC3, PSMD4, PTTG1, PSMC4, UBE2S, PSMA2, PSMB3, PSMC1, PSME1, PSMF1	1011	76	11009	2.435746264771722	0.8833970456847665	0.0715883	0.0696468
UP_KW_BIOLOGICAL_PROCESS	KW-0235~DNA replication	19	0.9989484752891693	0.0012437	CDT1, FEN1, RFC4, PCNA, POLN, LIG4, POLD3, POLD4, POLA2, CHAF1B, DBF4, CDC45, ORC1, POLD1, GRWD1, MCM3, REV3L, MCM6, MCM2	980	96	11376	2.297448979591837	0.1702840123131345	0.0373111	0.0360674
GOTERM_BP_DIRECT	GO:0051607~defense response to virus	34	1.7875920084121977	0.0012857	IFITM3, RTP4, IFITM1, CXCL9, CD40, IFITM2, IFIT5, OASL, PYCARD, HERC5, PMAIP1, IKBKE, TRIM22, ZBP1, APOBEC3D, RSAD2, APOBEC3H, MX2, MX1, ISG15, IFNLR1, UNC13D, BST2, AIM2, IFI27, OAS2, OAS3, TTC4, DDIT4, IRF7, POLR3G, SERINC3, LSM14A, MYD88	1566	236	19462	1.7904517609368573	0.99818	0.3318457632322061	0.33130441614699857
GOTERM_CC_DIRECT	GO:0005739~mitochondrion	149	7.833859095688749	0.00131686	TDRKH, ACAA2, TFRC, CLPB, NDUFA12, TACO1, ARAF, COX6A1, CISD3, PYCARD, RPS6KA6, CHCHD6, PDK4, CPNE3, HADH, PDK2, STARD3, SDS, RSAD2, PPTC7, ECH1, TOMM34, ACSL5, GTPBP8, COX6B1, ATAD3C, GTPBP3, CYP27A1, ARMCX3, RAB32, IFI27, DDIT4, TMEM126A, CMPK2, SLC22A4, LIPT2, ENY2, MAOB, SHMT2, SP140, MRPL16, MRPL17, MRPL13, UQCRH, AK9, APH1A, CYB5R1, PRDX5, KLC3, CYP11A1, PMAIP1, PUSL1, PRODH, COA4, PRELID1,…	1642	1467	20660	1.2779484011633941	0.6993370579466793	0.10917945316868978	0.10786259572915514
GOTERM_MF_DIRECT	GO:0008017~microtubule binding	38	1.9978969505783386	0.00139328	MAP10, RGS14, KATNB1, JAKMIP1, SKA2, UXT, KLC3, MAP1LC3A, RACGAP1, HAUS8, KIF5A, MAP6, FAM83D, GTSE1, DLGAP5, SUN2, RCC2, MX2, PLK1, MX1, VASH2, MTUS2, MID1, DCDC1, CLIP3, TPX2, PSRC1, PRC1, KIF26A, KIFC1, REEP2, BIRC5, MAPRE3, KIF2C, KIF20A, KIFC3, GAPDH, SPC24	1539	273	18976	1.7162754940532718	0.8660806986391305	0.3348528252382678	0.33438839690922717
GOTERM_BP_DIRECT	GO:0048146~positive regulation of fibroblast proliferation	13	0.6834910620399579	0.00140389	CD74, WNT5A, FN1, LIG4, FBLN1, MIF, BMI1, PML, CDK6, CDK4, E2F1, GAS6, WNT2	1566	56	19462	2.8850346652070793	0.998982	0.34423284935631576	0.34367129495279813
REACTOME_PATHWAY	R-HSA-9675126~Diseases of mitotic cell cycle	11	0.5783385909568874	0.00140892	CDK6, CCND2, CCNE2, CCNE1, UBE2C, UBE2S, CDK4, ATRX, E2F1, E2F2, ANAPC11	1011	37	11009	3.2373352581067714	0.9131337811866188	0.0769928	0.0749048
REACTOME_PATHWAY	R-HSA-909733~Interferon alpha/beta signaling	17	0.8937960042060988	0.00143403	IFITM3, IFITM1, IFITM2, RSAD2, MX2, MX1, IFIT5, HLA-C, ISG15, USP18, OASL, BST2, IFI27, OAS2, IRF4, OAS3, IRF7	1011	77	11009	2.404113196398063	0.9168378022921139	0.0769928	0.0749048
REACTOME_PATHWAY	R-HSA-5684996~MAPK1/MAPK3 signaling	43	2.260778128286015	0.00146611	RASGRF1, ARAF, IRS2, RASAL3, IL2RG, FGF2, ACTB, PPP2CA, PPP1CB, PSMD9, FGF7, PSMB4, SYNGAP1, RASGEF1A, PSMD4, FGF9, PSMB3, PSMF1, CAMK2G, IL6R, GOLGA7, SPTBN2, DUSP4, FGA, ANGPT1, FN1, PPP2R5D, GFRA3, DUSP8, GRIN2D, DUSP7, RBX1, PSMA3, MRAS, PSMC3, ABHD17A, PSMC4, PSMA2, PSMC1, IL2RB, PSME1, PRKCQ, PTPN7	1011	286	11009	1.6371902084068257	0.9213406141505199	0.0769928	0.0749048
GOTERM_CC_DIRECT	GO:0005788~endoplasmic reticulum lumen	41	2.155625657202944	0.00170238	SPON1, FKBP14, SDC2, DMP1, THBS1, LTBP1, PRSS23, FSTL3, SERPINH1, SPP1, APOE, APOL1, B2M, COL28A1, FGA, TOR3A, COL23A1, WNT5A, TMEM132A, FN1, ANO8, CP, PDIA6, JMJD8, CKAP4, COL1A1, F7, COL3A1, CD4, F8, COL1A2, DNAJB11, MXRA8, SERPING1, COL4A5, COL8A1, VWA1, NUCB1, P4HB, PPIB, GAS6	1642	311	20660	1.6587488397413552	0.7885759963336656	0.12938055318291794	0.12782004212479064
REACTOME_PATHWAY	R-HSA-5673001~RAF/MAP kinase cascade	42	2.2082018927444795	0.00175448	RASGRF1, ARAF, IRS2, RASAL3, IL2RG, FGF2, ACTB, PPP2CA, PPP1CB, PSMD9, FGF7, PSMB4, SYNGAP1, RASGEF1A, PSMD4, FGF9, PSMB3, PSMF1, CAMK2G, GOLGA7, SPTBN2, DUSP4, FGA, ANGPT1, FN1, PPP2R5D, GFRA3, DUSP8, GRIN2D, DUSP7, RBX1, PSMA3, MRAS, PSMC3, ABHD17A, PSMC4, PSMA2, PSMC1, IL2RB, PSME1, PRKCQ, PTPN7	1011	280	11009	1.6333827893175075	0.9523171818244264	0.0894269	0.0870016
GOTERM_BP_DIRECT	GO:0006261~DNA-dependent DNA replication	10	0.5257623554153523	0.00176257	POLD3, POLD4, RFC4, PSMC3, POLN, PSMC4, POLD1, PSMC1, WDR18, REV3L	1566	36	19462	3.4521782318717187	0.9998250996269045	0.4116032154281516	0.41093175830673534
UP_KW_BIOLOGICAL_PROCESS	KW-0132~Cell division	55	2.8916929547844377	0.00185956	MAP10, CLTA, CDC20, PPP1CB, CCND2, PTTG1, PELO, LIG4, HAUS3, HAUS5, SIRT2, PSRC1, CCNE2, SAPCD2, CCNE1, KIFC1, CHMP3, BIRC5, MAPRE3, KIF2C, ARL8A, CDC123, RGS14, VPS4A, CDCA7, KATNB1, CDCA8, NCAPH, ANAPC11, SKA2, CCNB2, DSN1, HAUS8, RACGAP1, FAM83D, BUB1, STOX1, CENPT, CDT1, UBE2I, UBE2C, RCC2, PLK1, KLHDC8B, DCDC1, ZWINT, TPX2, SNRK, CDK6, UBE2S, PRC1, CDK4, MPLKIP, SPC24, RAN	980	421	11376	1.5165058897668333	0.24360710693700516	0.0464891	0.0449395
REACTOME_PATHWAY	R-HSA-69017~CDK-mediated phosphorylation and removal of Cdc6	16	0.8412197686645636	0.0019422	UBE2C, ANAPC11, PSMD9, PSMA3, PSMB4, PSMC3, CCNE2, PSMD4, CCNE1, PSMC4, UBE2S, PSMA2, PSMB3, PSMC1, PSME1, PSMF1	1011	72	11009	2.419826354544455	0.9655797197731009	0.0929409	0.0904203
GOTERM_BP_DIRECT	GO:0042742~defense response to bacterium	36	1.8927444794952681	0.00194435	IGHV2-70, IGHM, IGHV4-31, IGHV2-5, IGHV1OR15-1, IGHV3-23, IGHV4-34, IGHV1-2, IGHV3-48, IGHV3-49, COCH, SPN, CASP7, GNLY, IGLC3, ROMO1, TRDC, IKBKG, IGLC2, IGHV3-7, IGHV4-61, IGHV3-30, SYK, IGHV3-53, IGLC7, IGHV3-11, IGLC6, ISG15, IGHV4-28, LYZ, IGHV1-18, IGLL5, OAS2, OAS3, MYD88, NAIP	1566	261	19462	1.714185053067336	0.9999283960566483	0.42260422569206435	0.4219148223875096
GOTERM_BP_DIRECT	GO:0051301~cell division	49	2.576235541535226	0.00198203	MAP10, CLTA, CDC20, PPP1CB, CCND2, PTTG1, PELO, LIG4, HAUS3, HAUS5, SIRT2, PSRC1, CCNE2, CCNE1, KIFC1, BIRC5, MAPRE3, KIF2C, ARL8A, CDC123, RGS14, VPS4A, CDCA7, KATNB1, CDCA8, NCAPH, ANAPC11, SKA2, CCNB2, DSN1, HAUS8, FAM83D, BUB1, STOX1, CENPT, CDT1, UBE2I, UBE2C, RCC2, DCDC1, ZWINT, TPX2, CDK6, UBE2S, PRC1, CDK4, MPLKIP, SPC24, RAN	1566	389	19462	1.5654607714708768	0.999941	0.42260422569206435	0.4219148223875096
REACTOME_PATHWAY	R-HSA-69275~G2/M Transition	32	1.6824395373291272	0.00199395	LIN37, HMMR, PKMYT1, FOXM1, PPP2CA, PPP1CB, PSMD9, CCNB2, PSMB4, HAUS8, PSMD4, PSMB3, TUBB1, MYBL2, PSMF1, GTSE1, YWHAG, CEP152, PLK1, HAUS3, FBXL18, HAUS5, TUBG1, RBX1, TPX2, PSMA3, PSMC3, PSMC4, PSMA2, PSMC1, AKAP9, PSME1	1011	197	11009	1.7688070814944243	0.9685378884970212	0.0929409	0.0904203
KEGG_PATHWAY	hsa04115:p53 signaling pathway	16	0.8412197686645636	0.00201724	GADD45B, SIVA1, CD82, EI24, GORAB, THBS1, CCNB2, CDK6, CCND2, CCNE2, CCNE1, AIFM2, CDK4, PMAIP1, SFN, GTSE1	770	74	8586	2.410951210951211	0.4956748336296478	0.066489	0.063547
KEGG_PATHWAY	hsa04512:ECM-receptor interaction	18	0.9463722397476341	0.00206262	TNXB, SDC4, LAMA3, FN1, DMP1, HMMR, THBS2, THBS1, COL1A1, COMP, RELN, COL1A2, ITGA11, SPP1, COL4A5, SDC1, ITGB7, FREM1	770	89	8586	2.2551875091200935	0.5033906408281059	0.066489	0.063547
REACTOME_PATHWAY	R-HSA-162906~HIV Infection	36	1.8927444794952681	0.00206778	ARF1, FEN1, VPS4A, SUPT4H1, CXCR4, PSMD9, PSMB4, PSMD4, PSMB3, POLR2C, AP2S1, NELFB, PSMF1, CCR5, B2M, POLR2J, AP1M1, LIG4, VPS37B, RBX1, CD4, PSMA3, PSMC3, PSMC4, LCK, PSMA2, PSMC1, PSME1, CHMP3, NMT2, CHMP4A, SLC25A5, PPIA, RAN, VPS28, CHMP5	1011	231	11009	1.6970210798103973	0.9723237625988947	0.0929409	0.0904203
GOTERM_CC_DIRECT	GO:0030496~midbody	28	1.4721345951629863	0.00210045	MAP10, GDI1, VPS4A, SLC2A1, CDCA8, KATNB1, ALKBH4, RACGAP1, RASGEF1B, USP8, RCC2, PLK1, KLHDC8B, VPS37B, SIRT2, DCDC1, PSRC1, PRC1, CHMP3, MPLKIP, BIRC5, MAPRE3, CHMP4A, KIF20A, PKN1, RAN, ARL8A, CHMP5	1642	189	20660	1.8640321198177472	0.8530440182609386	0.14735442642140298	0.14557712522553076
REACTOME_PATHWAY	R-HSA-381426~Regulation of Insulin-like Growth Factor (IGF) transport and uptake by Insulin-like Growth Factor Binding Proteins (IGFBPs)	23	1.2092534174553102	0.00210521	FGA, MMP1, SDC2, MMP2, TMEM132A, ANO8, FN1, PLG, DMP1, CP, PDIA6, LTBP1, PRSS23, CKAP4, FSTL3, SPP1, MXRA8, VWA1, NUCB1, P4HB, APOE, GAS6, APOL1	1011	125	11009	2.003616221562809	0.974065	0.0929409	0.0904203
KEGG_PATHWAY	hsa05415:Diabetic cardiomyopathy	32	1.6824395373291272	0.00215746	NDUFB7, NDUFB10, NDUFA12, COX4I1, NDUFB3, SLC2A1, UQCR10, COX5B, COX6A1, COX5A, UQCRH, PPP1CB, PDK4, CAMK2G, PDK2, NDUFA9, NDUFA7, G6PD, NDUFA5, PRKCB, MMP2, NDUFA1, COX6B1, COL1A1, COL3A1, PLCB3, COL1A2, UQCRQ, NDUFS5, NDUFAB1, SLC25A5, GAPDH	770	203	8586	1.7577378286737892	0.5191349714185647	0.066489	0.063547
REACTOME_PATHWAY	R-HSA-6798695~Neutrophil degranulation	64	3.3648790746582544	0.00217083	PIGR, SLC44A2, TMEM179B, GMFG, RAB3D, CRISP3, APEH, ITGAL, SIRPB1, PYCARD, HK3, GM2A, PLAU, TBC1D10C, TIMP2, COTL1, CPNE3, GOLGA7, B2M, CTSB, HLA-C, MIF, KCNAB2, RHOF, UNC13D, CKAP4, APRT, RAP2B, PSMA2, DNAJC5, TMBIM1, CHI3L1, PADI2, ADAM8, ALDOC, ALDOA, PPIA, ARL8A, FTL, RAB5C, HVCN1, PRCP, CNN2, DSN1, COMMD9, PRDX4, CD14, RAB6A, S100A11, AP1M1, CTSA, JUP, GGH, ARPC5, LYZ, PRDX6, CPPED1, BST2, P…	1011	480	11009	1.4518958127266732	0.9768587669416731	0.0929409	0.0904203
REACTOME_PATHWAY	R-HSA-2467813~Separation of Sister Chromatids	31	1.6298633017875919	0.00221567	CDCA8, ANAPC11, SKA2, PPP2CA, CDC20, PSMD9, DSN1, PSMB4, PSMD4, PTTG1, PSMB3, TUBB1, PSMF1, BUB1, CENPT, UBE2C, RCC2, PLK1, PPP2R5D, ZWINT, PSMA3, PSMC3, CENPH, PSMC4, UBE2S, PSMA2, PSMC1, PSME1, BIRC5, KIF2C, SPC24	1011	190	11009	1.776661981362903	0.9785925024116713	0.0929409	0.0904203
REACTOME_PATHWAY	R-HSA-3000170~Syndecan interactions	9	0.47318611987381703	0.00222134	COL1A1, COL3A1, COL1A2, SDC4, SDC2, FN1, SDC1, THBS1, FGF2	1011	27	11009	3.629739531816683	0.9788021581397267	0.0929409	0.0904203
REACTOME_PATHWAY	R-HSA-351202~Metabolism of polyamines	14	0.7360672975814931	0.00225246	NQO1, SRM, PSMD9, PSMA3, PSMB4, PSMC3, PSMD4, PSMC4, PSMA2, PSMB3, PSMC1, SMS, PSME1, PSMF1	1011	59	11009	2.5838823785813676	0.979918	0.0929409	0.0904203
REACTOME_PATHWAY	R-HSA-9755511~KEAP1-NFE2L2 pathway	23	1.2092534174553102	0.00233552	NQO1, G6PD, PRKAA2, SRXN1, CSNK2A1, RBX1, PSMD9, GCLC, PSMA3, PSMB4, PSMC3, PSMD4, PSMC4, PSMA2, PSMB3, PSMC1, PRDX1, PSME1, CCL2, HMOX1, MAFK, PSMF1, TRIM21	1011	126	11009	1.9877145055186598	0.9826158691206067	0.0941271	0.0915743
UP_KW_CELLULAR_COMPONENT	KW-0472~Membrane	732	38.48580441640379	0.00249143	TDRKH, TFRC, TMEM200A, ZFYVE9, FRMPD1, IGHV3-23, MRGPRF, ENO1, SLA2, KRTCAP3, GPR176, IGKV1-16, IGKV1-17, GJA5, IGKV1-12, IGHV3-7, STARD3, IGHV3-30, PRKCB, GLCE, COL23A1, HPCAL1, TOMM20L, SYTL1, PHKA1, TMEM80, UNC13D, SYTL2, SCAMP2, SIGIRR, AR, IGKV1-27, ERVW-1, TMEM126A, CTAGE9, CDIP1, PRKCQ, VPS25, VPS28, RNF122, RPN2, RETSAT, SHMT2, CLCNKA, SLC5A1, TAPBPL, THY1, KIAA0040, CYB5R1, FAM171A2, CHS…	1461	8294	17831	1.0771409430334589	0.13901007946120192	0.0373715	0.0342572
UP_SEQ_FEATURE	DISULFID:Interchain	27	1.4195583596214512	0.00251765	KCNK5, SRXN1, MSTN, TFRC, LAMA3, THBS2, THBS1, SIRPB1, COMP, RELN, CTLA4, CA9, IKBKG, S100A11, FGA, GDF15, BMP8A, INHBB, INHBA, BMP7, BST2, COL1A1, COL3A1, TFF3, TXNIP, COL4A5, C1QC	1627	183	20583	1.8665249327435591	0.9999994734406141	1	1
REACTOME_PATHWAY	R-HSA-877300~Interferon gamma signaling	19	0.9989484752891693	0.00253784	HLA-DRB5, VCAM1, HLA-C, MID1, PML, ICAM1, OASL, OAS2, IRF4, OAS3, TRIM46, IRF7, TRIM25, TRIM21, CAMK2G, B2M, GBP4, TRIM22, HLA-DRB1	1011	96	11009	2.1551578470161554	0.9877675169972668	0.0999561	0.0972453
GOTERM_BP_DIRECT	GO:0045071~negative regulation of viral genome replication	11	0.5783385909568874	0.00258688	IFITM3, BST2, IFITM1, IFITM2, RSAD2, OAS2, OAS3, MX1, IFIT5, ISG15, OASL	1566	45	19462	3.0379168440471123	0.9999969565195683	0.5285863240335719	0.5277240298671223
REACTOME_PATHWAY	R-HSA-187577~SCF(Skp2)-mediated degradation of p27/p21	14	0.7360672975814931	0.0026393	PSMD9, PSMA3, PSMB4, PSMC3, CCNE2, PSMD4, CCNE1, PSMC4, PSMA2, CDK4, PSMB3, PSMC1, PSME1, PSMF1	1011	60	11009	2.5408176722716784	0.9897446660695981	0.10164246038711587	0.0988859
KEGG_PATHWAY	hsa04216:Ferroptosis	11	0.5783385909568874	0.00269917	GCLC, MAP1LC3A, TFRC, PCBP1, ACSL6, ACSL5, HMOX1, SLC3A2, CP, SLC39A14, FTL	770	41	8586	2.9916376306620207	0.599986	0.0762516	0.0728776
GOTERM_CC_DIRECT	GO:0005743~mitochondrial inner membrane	58	3.0494216614090432	0.00280693	NDUFA12, MRPS14, COX4I1, MRPL36, COX6A1, IMMP2L, MTG1, CHCHD6, TIMM17A, TIMM17B, SLC25A43, MRPL9, MRPS28, RSAD2, MRPS21, MRPL48, MRPL44, COX6B1, CYP27A1, SLC25A16, MRPL51, NDUFS5, TMEM126A, SPNS1, SLC25A12, SLC25A5, STOML2, NDUFB7, MRPS35, NDUFB10, SHMT2, NDUFB3, TIMM13, MRPL16, MRPL17, UQCR10, COX5B, COX5A, MRPL13, UQCRH, TMEM65, CYP11A1, ROMO1, PRODH, NDUFA9, NDUFA7, PET100, NDUFA5, PDE2A, NDUF…	1642	494	20660	1.477264321677425	0.9229668940055574	0.1721554383485021	0.17007900214035132
GOTERM_CC_DIRECT	GO:0005829~cytosol	497	26.130389064143007	0.0028315	ZFYVE9, FRMPD1, ARAF, STMN3, ENO1, SLA2, LIPA, FAM110A, PSMD9, RNF114, SYNGAP1, DPYSL4, PSMD4, FGFR1OP2, DPYSL3, UBASH3A, GTSE1, STARD3, SDS, CSNK2A1, PRKCB, PHKA1, GTPBP4, UNC13D, WDR77, AR, DDIT4, PSME1, ACOT1, TXNIP, PADI2, PRKCQ, HOXB7, MYL9, VPS25, VPS28, ASF1B, ZNF397, TPH1, CRABP2, SHMT2, CRABP1, CDCA7, CDCA8, THY1, IQGAP3, NCAPH, SKA2, ANAPC11, ADH4, CYB5R1, PRDX5, PRDX4, RIC8B, BLOC1S1, …	1642	5629	20660	1.110918769578715	0.9246788594145744	0.1721554383485021	0.17007900214035132
REACTOME_PATHWAY	R-HSA-173107~Binding and entry of HIV virion	4	0.2103049421661409	0.00286902	CD4, CXCR4, CCR5, PPIA	1011	4	11009	10.889218595450048	0.9931201737963471	0.10344931918038318	0.10064371156268094
GOTERM_BP_DIRECT	GO:0009410~response to xenobiotic stimulus	37	1.9453207150368035	0.00289557	NNMT, MAOB, RPN2, PTPRM, THBS1, LIPA, LRP8, NFKBIZ, SLITRK5, HMOX1, RAD54L, CD38, CA9, BAK1, NKX6-1, HADH, PMS1, TIMP4, SNCA, MAP2K6, GPX1, TRPA1, PRKCB, SRD5A1, MMP2, XRCC1, INHBA, SOD1, COL1A1, GCLC, LOX, LCK, CDK4, SCNN1B, TXNIP, FOSB, PLIN2	1566	277	19462	1.660036608250227	0.9999993329837484	0.5679941340630051	0.5670675530938976
REACTOME_PATHWAY	R-HSA-176409~APC/C:Cdc20 mediated degradation of mitotic proteins	16	0.8412197686645636	0.00295696	UBE2C, ANAPC11, CDC20, PSMD9, PSMA3, PSMB4, PSMC3, PSMD4, PTTG1, PSMC4, UBE2S, PSMA2, PSMB3, PSMC1, PSME1, PSMF1	1011	75	11009	2.323033300362677	0.994095	0.10344931918038318	0.10064371156268094
REACTOME_PATHWAY	R-HSA-1236975~Antigen processing-Cross presentation	20	1.0515247108307046	0.00297933	FGA, HLA-C, SEC61A1, PSMD9, PSMA3, PSMB4, PSMC3, PSMD4, PSMC4, PSMA2, PSMB3, PSMC1, SEC61G, PSME1, CD14, IKBKG, SEC61B, PSMF1, B2M, MYD88	1011	105	11009	2.074136875323819	0.9943204949878887	0.10344931918038318	0.10064371156268094
REACTOME_PATHWAY	R-HSA-9661069~Defective binding of RB1 mutants to E2F1,(E2F2, E2F3)	7	0.36803364879074657	0.00299701	CDK6, CCND2, CCNE2, CCNE1, CDK4, E2F1, E2F2	1011	17	11009	4.483795892244138	0.9944923288419972	0.10344931918038318	0.10064371156268094
REACTOME_PATHWAY	R-HSA-9659787~Aberrant regulation of mitotic G1/S transition in cancer due to RB1 defects	7	0.36803364879074657	0.00299701	CDK6, CCND2, CCNE2, CCNE1, CDK4, E2F1, E2F2	1011	17	11009	4.483795892244138	0.9944923288419972	0.10344931918038318	0.10064371156268094
GOTERM_BP_DIRECT	GO:0051726~regulation of cell cycle	36	1.8927444794952681	0.00303011	CDC123, PRCC, YEATS4, FOXM1, FGF2, ACTB, TBRG4, ING4, MECOM, VPS72, FIGNL1, E2F2, SFN, BAK1, DMAP1, MAP2K6, RBM38, CDKL3, GADD45B, CSNK2A1, MX2, PLK1, SIRT2, PML, PER2, BOP1, ZZZ3, MRGBP, SON, CDK6, CCNE2, CCNE1, CDK4, ID3, BIRC5, CDKN3	1566	268	19462	1.6694115628752788	0.9999996558617589	0.571526	0.5705931813015278
REACTOME_PATHWAY	R-HSA-9604323~Negative regulation of NOTCH4 signaling	13	0.6834910620399579	0.00304438	YWHAZ, RBX1, PSMD9, PSMA3, PSMB4, PSMC3, PSMD4, PSMC4, PSMA2, PSMB3, PSMC1, PSME1, PSMF1	1011	54	11009	2.621478550756493	0.9949277083814333	0.10344931918038318	0.10064371156268094
REACTOME_PATHWAY	R-HSA-202733~Cell surface interactions at the vascular wall	24	1.2618296529968454	0.00316689	CD74, CD84, SDC4, ANGPT1, MMP1, SDC2, FN1, SLC3A2, ATP1B2, MIF, ITGAL, SPN, CD2, COL1A1, SLC7A5, COL1A2, SELL, LCK, TSPAN7, SDC1, CD48, GAS6, SLC16A3, PPIA	1011	137	11009	1.9076003378890598	0.9959006606610834	0.10554270706878927	0.10268032551527909
GOTERM_BP_DIRECT	GO:0006952~defense response	16	0.8412197686645636	0.0033614	IL32, STAT5A, CD84, CXCL9, CD83, CRISP3, MX2, SP140, MX1, INHBB, MST1R, INHBA, PYCARD, STAT4, CD48, FCGR2B	1566	86	19462	2.3121565832071047	0.9999999325629203	0.6105297562499318	0.6095337860113512
REACTOME_PATHWAY	R-HSA-9687139~Aberrant regulation of mitotic cell cycle due to RB1 defects	10	0.5257623554153523	0.00350507	CDK6, CCND2, CCNE2, CCNE1, UBE2C, UBE2S, CDK4, E2F1, E2F2, ANAPC11	1011	35	11009	3.1112053129857284	0.9977231242895892	0.11460907089696937	0.11150080411557436
GOTERM_CC_DIRECT	GO:0005604~basement membrane	17	0.8937960042060988	0.00355225	COL28A1, LAD1, CD151, SPARC, ENTPD2, COL23A1, LAMA3, FN1, FBLN1, THBS2, EFNA5, SPN, ACTA2, COL4A5, VWA1, RELL2, FREM1	1642	96	20660	2.228100893219651	0.9610477983184694	0.20247826822322745	0.20003609612842976
REACTOME_PATHWAY	R-HSA-8854050~FBXL7 down-regulates AURKA during mitotic entry and in early mitosis	13	0.6834910620399579	0.00357623	FBXL18, RBX1, PSMD9, PSMA3, PSMB4, PSMC3, PSMD4, PSMC4, PSMA2, PSMB3, PSMC1, PSME1, PSMF1	1011	55	11009	2.5738153043791026	0.997988	0.11477045504440103	0.11165781142807855
GOTERM_BP_DIRECT	GO:0030174~regulation of DNA-dependent DNA replication initiation	6	0.31545741324921134	0.00361057	CDT1, WDR18, GMNN, MCM3, MCM6, MCM2	1566	14	19462	5.326217843459223	0.9999999802136205	0.6323653609232263	0.6313337697961084
KEGG_PATHWAY	hsa05014:Amyotrophic lateral sclerosis	49	2.576235541535226	0.00386609	NDUFA12, COX4I1, COX6A1, ACTB, PSMD9, MAP1LC3A, PSMD4, TUBB1, KIF5A, GPX1, TRAF2, TOMM40L, COX6B1, PSMA3, PSMA2, NDUFS5, GRIA2, NDUFB7, DNAH7, NDUFB10, NDUFB3, DNAH6, DERL1, DNAH9, UQCR10, COX5B, COX5A, UQCRH, PSMB4, KLC3, POM121C, PSMB3, UBQLN4, MAP2K6, NDUFA9, NDUFA7, NDUFA5, ALYREF, NDUFA1, CHCHD10, GRIN2D, SOD1, FIG4, CCS, PSMC3, PSMC4, UQCRQ, PSMC1, NDUFAB1	770	364	8586	1.5010489510489509	0.7310271872192267	0.10071060600765344	0.0962544
UP_SEQ_FEATURE	MOTIF:Cell attachment site	16	0.8412197686645636	0.00398746	SEMA7A, TNXB, LAMA3, FN1, DMP1, THBS2, THBS1, LTBP1, MFAP5, COL1A1, COMP, ADAM15, GPNMB, SPP1, PTGFRN, FREM1	1627	89	20583	2.2743175210458344	0.9999999998881434	1	1
UP_KW_MOLECULAR_FUNCTION	KW-0049~Antioxidant	6	0.31545741324921134	0.00406582	PRDX5, PRDX4, SRXN1, PRDX1, PRDX6, SOD1	909	15	11871	5.223762376237624	0.3373342767509877	0.410648	0.410648
REACTOME_PATHWAY	R-HSA-8957275~Post-translational protein phosphorylation	20	1.0515247108307046	0.00412123	FGA, SDC2, TMEM132A, ANO8, FN1, DMP1, CP, PDIA6, LTBP1, PRSS23, CKAP4, FSTL3, SPP1, MXRA8, VWA1, NUCB1, P4HB, APOE, GAS6, APOL1	1011	108	11009	2.0165219621203794	0.9992204906614376	0.12801510894220233	0.1245432623638506
REACTOME_PATHWAY	R-HSA-174084~Autodegradation of Cdh1 by Cdh1:APC/C	14	0.7360672975814931	0.00413667	UBE2C, ANAPC11, PSMD9, PSMA3, PSMB4, PSMC3, PSMD4, PSMC4, UBE2S, PSMA2, PSMB3, PSMC1, PSME1, PSMF1	1011	63	11009	2.419826354544455	0.999241	0.12801510894220233	0.1245432623638506
GOTERM_BP_DIRECT	GO:0098609~cell-cell adhesion	28	1.4721345951629863	0.00415598	TNXB, LAMA3, ICAM2, THY1, ITGAE, ICAM5, ITGAL, CELSR3, ICAM1, TMEM47, PDLIM1, ANXA9, ICOS, S100A11, CDON, VCAM1, JUP, NEGR1, DCC, CD2, KRT18, NPHS1, ITGA11, CDHR2, CDC42EP1, ADAM8, DSG4, TJP3	1566	196	19462	1.775405947819741	0.9999999986503159	0.6987487540609384	0.6976088702859613
KEGG_PATHWAY	hsa05010:Alzheimer disease	51	2.6813880126182967	0.00415914	NDUFA12, COX4I1, ARAF, IRS2, COX6A1, PSMD9, CASP7, PSMD4, TUBB1, KIF5A, IKBKG, SLC39A1, PSENEN, CSNK2A1, WNT5A, TRAF2, SLC39A14, COX6B1, PSMA3, PLCB3, PSMA2, NDUFS5, SLC25A5, GAPDH, NDUFB7, NDUFB10, NDUFB3, UQCR10, COX5B, COX5A, UQCRH, APH1A, PSMB4, KLC3, APH1B, PSMB3, APOE, WNT2, SNCA, NDUFA9, NDUFA7, NDUFA5, NDUFA1, FZD8, GRIN2D, PSMC3, PSMC4, UQCRQ, PSMC1, NDUFAB1, CSNK1A1L	770	384	8586	1.4809456168831168	0.7565609622556864	0.10071060600765344	0.0962544
GOTERM_BP_DIRECT	GO:0006954~inflammatory response	52	2.7339642481598316	0.0044278	CXCL9, CD40, ITGAL, LIPA, PYCARD, IL18RAP, NFKBIZ, TMED2, CCR7, IKBKG, LGALS9, CCR5, SCN1A, CD96, PTGIR, WNT5A, F2R, MIF, IL17RC, AIM2, TXNIP, CHI3L1, PRKCQ, ADAM8, NAIP, CCL13, SEMA7A, PTGER2, CXCR4, THBS1, PTGS1, PRDX5, CCL8, CNR2, IRAK2, SPP1, AGR2, CCL2, CD14, PLA2G2D, VCAM1, RARRES2, NKG7, LYZ, MFHAS1, CXCL10, THEMIS2, CAMK4, ACER3, SDC1, FCGR2B, MYD88	1566	436	19462	1.4822196445100588	0.9999999996461554	0.6987487540609384	0.6976088702859613
GOTERM_BP_DIRECT	GO:0001934~positive regulation of protein phosphorylation	31	1.6298633017875919	0.00454595	SEMA7A, CD40, TFRC, FLT4, ARAF, CDCA8, EFNA5, FGF2, IQGAP3, SPN, CLN3, FGF7, RELN, CCND2, FGF9, GPNMB, RSPO1, MAP2K6, CDON, CD74, ANGPT1, RARRES2, FZD8, INHBA, CLIP3, CD4, CD6, BIRC5, GAS6, PPIA, HLA-DRB1	1566	226	19462	1.7047039410481584	0.9999999998022767	0.6987487540609384	0.6976088702859613
GOTERM_BP_DIRECT	GO:0050776~regulation of immune response	10	0.5257623554153523	0.00455954	SPN, FCGR3A, CD40, LAG3, GPR108, IRF7, DNASE2, FCGR2B, SLA2, HCST	1566	41	19462	3.031180886521509	0.9999999998150788	0.6987487540609384	0.6976088702859613
UP_KW_DISEASE	KW-1065~Osteogenesis imperfecta	8	0.4206098843322818	0.00456446	COL1A1, SPARC, COL1A2, SERPINH1, KDELR2, P4HB, PPIB, TMEM38B	399	26	4728	3.646038172353961	0.37575724771290364	0.47013971619806305	0.47013971619806305
GOTERM_MF_DIRECT	GO:0004185~serine-type carboxypeptidase activity	4	0.2103049421661409	0.00469056	CTSA, SCPEP1, PRCP, CPVL	1539	5	18976	9.864067576348278	0.998863	0.9662546823276383	0.9649145232675446
UP_KW_CELLULAR_COMPONENT	KW-0458~Lysosome	49	2.576235541535226	0.00471388	IFITM3, IFITM1, PLEKHF1, IFITM2, CPQ, FASLG, LIPA, SULT1C2, LAPTM4B, IL4I1, GM2A, LAMP3, CTSB, SRGN, CCDC115, CYB561A3, SLC39A14, UNC13D, PLA2G15, SLC7A5, NAAA, TMBIM1, SPNS1, CDIP1, KXD1, DNASE2, TMEM9, ARL8A, CXCR4, PRCP, SLC3A2, TMEM25, CLN3, DRAM1, BLOC1S1, SLC15A3, GPR155, CTSA, CD74, HLA-DRB5, CCZ1B, LAPTM5, GGH, NKG7, PRDX6, GLB1, SYT11, HLA-DRB1, ITM2C	1461	400	17831	1.4950701574264202	0.24685803820022967	0.056566563658660314	0.0518527
KEGG_PATHWAY	hsa04064:NF-kappa B signaling pathway	19	0.9989484752891693	0.00473261	CCL13, CD40, UBE2I, VCAM1, SYK, GADD45B, CSNK2A1, PRKCB, TRAF2, TNFRSF13C, TNFSF13B, ICAM1, PLAU, LCK, TRIM25, PRKCQ, CD14, IKBKG, MYD88	770	104	8586	2.0371378621378624	0.7997446538381343	0.10695690588873515	0.10222429943348138
GOTERM_CC_DIRECT	GO:0016020~membrane	334	17.560462670872763	0.00495864	IFITM1, SPARC, TFRC, TMEM200A, ICAM2, OGFOD3, ENO1, ACTB, ICAM1, NIPAL4, PNN, KRTCAP3, VSIG2, TBC1D10C, PIEZO1, B2M, GTSE1, SLC12A8, SLC34A2, ENTPD2, KRT2, ENTPD5, ECH1, HPCAL1, ACSL6, ALG2, HLA-C, SLC6A12, ACSL5, MOGS, TMEM80, GTPBP4, UNC13D, TAS2R19, MED6, SYTL2, SCAMP2, SIGIRR, DDX39A, SOAT1, TMEM126A, KDELR2, ANKRA2, FREM1, CD101, RNF122, SLC45A2, RPN2, RETSAT, IGSF1, TAS2R46, NCAPH, KIAA0040…	1642	3693	20660	1.1379529959732226	0.9892573494800712	0.26052225272856466	0.2573799887153912
UP_SEQ_FEATURE	TRANSMEM:Helical; Signal-anchor for type III membrane protein	9	0.47318611987381703	0.00509843	SIGIRR, PRR7, STOML1, EPHX1, ACSL6, ACSL5, TNFRSF13C, LAX1, PAG1	1627	35	20583	3.25309	0.9999999999998143	1	1
GOTERM_CC_DIRECT	GO:0009986~cell surface	72	3.7854889589905363	0.00514189	IGHM, CD40, SPARC, TFRC, ENO1, LRRC32, ITGAL, SIRPB1, ICAM1, SPN, APMAP, PLAU, LAMP3, CD38, CCR7, ITGB7, ANXA9, PTGFRN, CCR5, KCNH2, SEMA6C, IL15RA, FGA, DCC, COL23A1, WNT5A, F2R, HLA-C, RTN4RL2, MIF, IL17RC, RGMA, GREM1, GJD3, ADAM15, GPRIN1, MXRA8, ADAM8, VAMP5, HCST, CHRNA1, NLGN1, CD151, SDC4, HM13, SDC2, CXCR4, PLG, SLC3A2, MST1R, THY1, HMMR, IL2RG, THBS1, LRP8, ZPLD1, GPC4, TIGIT, MPZL1, S1…	1642	658	20660	1.3767775231480626	0.9909183394186168	0.26052225272856466	0.2573799887153912
REACTOME_PATHWAY	R-HSA-174143~APC/C-mediated degradation of cell cycle proteins	17	0.8937960042060988	0.0052218	UBE2C, PLK1, ANAPC11, CDC20, PSMD9, PSMA3, PSMB4, PSMC3, PSMD4, PTTG1, PSMC4, UBE2S, PSMA2, PSMB3, PSMC1, PSME1, PSMF1	1011	87	11009	2.127778346237366	0.999885	0.15372160830929957	0.14955258604124586
REACTOME_PATHWAY	R-HSA-453276~Regulation of mitotic cell cycle	17	0.8937960042060988	0.0052218	UBE2C, PLK1, ANAPC11, CDC20, PSMD9, PSMA3, PSMB4, PSMC3, PSMD4, PTTG1, PSMC4, UBE2S, PSMA2, PSMB3, PSMC1, PSME1, PSMF1	1011	87	11009	2.127778346237366	0.999885	0.15372160830929957	0.14955258604124586
REACTOME_PATHWAY	R-HSA-174184~Cdc20:Phospho-APC/C mediated degradation of Cyclin A	15	0.7886435331230284	0.00523345	UBE2C, ANAPC11, CDC20, PSMD9, PSMA3, PSMB4, PSMC3, PSMD4, PSMC4, UBE2S, PSMA2, PSMB3, PSMC1, PSME1, PSMF1	1011	72	11009	2.268587207385427	0.9998875937051518	0.15372160830929957	0.14955258604124586
REACTOME_PATHWAY	R-HSA-176408~Regulation of APC/C activators between G1/S and early anaphase	16	0.8412197686645636	0.00559202	UBE2C, PLK1, ANAPC11, CDC20, PSMD9, PSMA3, PSMB4, PSMC3, PSMD4, PSMC4, UBE2S, PSMA2, PSMB3, PSMC1, PSME1, PSMF1	1011	80	11009	2.17784	0.9999398196795535	0.16151612813024843	0.15713571380703917
GOTERM_BP_DIRECT	GO:0006270~DNA replication initiation	8	0.4206098843322818	0.00564085	POLA2, CDC45, ORC1, CCNE2, CCNE1, MCM3, MCM6, MCM2	1566	28	19462	3.550811895639482	0.9999999999991042	0.8382648823154502	0.8368974028989488
REACTOME_PATHWAY	R-HSA-350562~Regulation of ornithine decarboxylase (ODC)	12	0.6309148264984227	0.00568539	NQO1, PSMD9, PSMA3, PSMB4, PSMC3, PSMD4, PSMA2, PSMC4, PSMB3, PSMC1, PSME1, PSMF1	1011	51	11009	2.5621690812823648	0.9999488572550108	0.16152089971870937	0.15714035598715753
REACTOME_PATHWAY	R-HSA-179419~APC:Cdc20 mediated degradation of cell cycle proteins prior to satisfation of the cell cycle checkpoint	15	0.7886435331230284	0.00594331	UBE2C, ANAPC11, CDC20, PSMD9, PSMA3, PSMB4, PSMC3, PSMD4, PSMC4, UBE2S, PSMA2, PSMB3, PSMC1, PSME1, PSMF1	1011	73	11009	2.2375106702979553	0.9999673765972916	0.1640892549585887	0.15963905589162178
KEGG_PATHWAY	hsa04114:Oocyte meiosis	22	1.1566771819137749	0.00604521	PLK1, PPP2R5D, PKMYT1, YWHAZ, ADCY7, REC8, ANAPC11, RBX1, PPP2CA, PPP1CB, CDC20, CCNB2, AR, RPS6KA3, RPS6KA6, CCNE2, PTTG1, CCNE1, SPDYA, CAMK2G, BUB1, YWHAG	770	131	8586	1.872628135223555	0.8719768993129209	0.12203072710809693	0.11663113741304838
KEGG_PATHWAY	hsa01230:Biosynthesis of amino acids	15	0.7886435331230284	0.00611953	PRPS2, SDS, SHMT2, IDH2, PYCR1, PYCR2, ENO1, MAT1A, ENO4, CTH, ALDOC, PHGDH, ALDOA, GAPDH, PFKP	770	75	8586	2.2301298701298697	0.8751816667036109	0.12203072710809693	0.11663113741304838
UP_KW_BIOLOGICAL_PROCESS	KW-0679~Respiratory chain	14	0.7360672975814931	0.00614401	NDUFA9, NDUFA7, NDUFB7, NDUFB10, NDUFA5, NDUFA12, NDUFB3, NDUFA1, UQCR10, UQCRH, HIGD2A, UQCRQ, NDUFS5, NDUFAB1	980	70	11376	2.3216326530612243	0.6032483665042072	0.1316574264014834	0.12726884552143394
REACTOME_PATHWAY	R-HSA-202403~TCR signaling	21	1.1041009463722398	0.00618124	HLA-DRB5, CD3E, ENAH, PSMD9, PSMA3, CD4, PSMB4, PSMC3, PSMD4, PSMC4, PSMA2, PSMB3, LCK, PSMC1, PSME1, PRKCQ, IKBKG, PSMF1, PAG1, HLA-DRB1, CD101	1011	120	11009	1.9056132542037587	0.9999784544093542	0.1640892549585887	0.15963905589162178
REACTOME_PATHWAY	R-HSA-69166~Removal of the Flap Intermediate	6	0.31545741324921134	0.0063688	POLD3, POLD4, POLA2, FEN1, PCNA, POLD1	1011	14	11009	4.666807969478593	0.9999844652534996	0.1640892549585887	0.15963905589162178
REACTOME_PATHWAY	R-HSA-69109~Leading Strand Synthesis	6	0.31545741324921134	0.0063688	POLD3, POLD4, POLA2, RFC4, PCNA, POLD1	1011	14	11009	4.666807969478593	0.9999844652534996	0.1640892549585887	0.15963905589162178
REACTOME_PATHWAY	R-HSA-69091~Polymerase switching	6	0.31545741324921134	0.0063688	POLD3, POLD4, POLA2, RFC4, PCNA, POLD1	1011	14	11009	4.666807969478593	0.9999844652534996	0.1640892549585887	0.15963905589162178
REACTOME_PATHWAY	R-HSA-162594~Early Phase of HIV Life Cycle	6	0.31545741324921134	0.0063688	CD4, FEN1, CXCR4, LIG4, CCR5, PPIA	1011	14	11009	4.666807969478593	0.9999844652534996	0.1640892549585887	0.15963905589162178
UP_SEQ_FEATURE	DOMAIN:Peptidase metallopeptidase	6	0.31545741324921134	0.00638198	MMP11, MMP14, MMP24, MMP15, MMP1, MMP2	1627	16	20583	4.744084204056546	0.9999999999999999	1	1
INTERPRO	IPR000301:Tetraspanin	8	0.4206098843322818	0.00643754	CD151, CD82, TSPAN17, TSPAN7, TSPAN4, CD9, CD37, TSPAN31	1577	28	19129	3.465712473955974	0.9999981390111032	1	1
KEGG_PATHWAY	hsa03050:Proteasome	11	0.5783385909568874	0.00652673	PSMD9, PSMA3, PSMB4, PSMC3, PSMD4, PSMA2, PSMC4, PSMB3, PSMC1, PSME1, PSMF1	770	46	8586	2.6664596273291923	0.8913706886612522	0.12292011305841577	0.11748117000273367
REACTOME_PATHWAY	R-HSA-9762114~GSK3B and BTRC:CUL1-mediated-degradation of NFE2L2	12	0.6309148264984227	0.00662796	PSMD9, PSMA3, PSMB4, PSMC3, PSMD4, PSMA2, PSMC4, PSMB3, PSMC1, PSME1, PSMF1, RBX1	1011	52	11009	2.5128965989500114	0.9999901149007097	0.1640892549585887	0.15963905589162178
REACTOME_PATHWAY	R-HSA-180534~Vpu mediated degradation of CD4	12	0.6309148264984227	0.00662796	PSMD9, PSMA3, CD4, PSMB4, PSMC3, PSMD4, PSMA2, PSMC4, PSMB3, PSMC1, PSME1, PSMF1	1011	52	11009	2.5128965989500114	0.9999901149007097	0.1640892549585887	0.15963905589162178
REACTOME_PATHWAY	R-HSA-75815~Ubiquitin-dependent degradation of Cyclin D	12	0.6309148264984227	0.00662796	PSMD9, PSMA3, PSMB4, PSMC3, PSMD4, PSMA2, PSMC4, CDK4, PSMB3, PSMC1, PSME1, PSMF1	1011	52	11009	2.5128965989500114	0.9999901149007097	0.1640892549585887	0.15963905589162178
GOTERM_MF_DIRECT	GO:0043027~cysteine-type endopeptidase inhibitor activity involved in apoptotic process	7	0.36803364879074657	0.00674826	RPS6KA3, PRDX5, CD27, BIRC5, GAS6, NAIP, SNCA	1539	22	18976	3.9232086951385194	0.9999425141549187	1	0.9993060374739764
KEGG_PATHWAY	hsa04514:Cell adhesion molecules	25	1.3144058885383807	0.00694716	NLGN1, CD40, SDC4, SDC2, ICAM2, PTPRM, ITGAL, ICAM1, SPN, SLITRK5, CTLA4, ITGB7, ICOS, TIGIT, MPZL1, HLA-DRB5, VCAM1, NEGR1, HLA-C, CD2, CD4, SELL, CD6, SDC1, HLA-DRB1	770	158	8586	1.7643432516850237	0.9058913147945677	0.12395190923431533	0.11846731148058458
REACTOME_PATHWAY	R-HSA-5656169~Termination of translesion DNA synthesis	9	0.47318611987381703	0.00697674	POLD3, POLD4, RFC4, PCNA, UBA7, POLD1, TRIM25, ISG15, UBE2L6	1011	32	11009	3.0625927299703264	0.9999946212616153	0.17029130649365043	0.16567290406710594
REACTOME_PATHWAY	R-HSA-1169091~Activation of NF-kappaB in B cells	14	0.7360672975814931	0.00712655	PRKCB, PSMD9, PSMA3, PSMB4, PSMC3, PSMD4, PSMC4, PSMA2, PSMB3, PSMC1, PSME1, IKBKG, PSMF1, NFKBIE	1011	67	11009	2.275359109497025	0.9999958588068069	0.17153206745766553	0.16688001484917722
INTERPRO	IPR018503:Tetraspanin, conserved site	7	0.36803364879074657	0.00730491	CD151, CD82, TSPAN17, TSPAN7, TSPAN4, CD9, CD37	1577	22	19129	3.8595434369055166	0.9999996875172111	1	1
UP_SEQ_FEATURE	ZN_FING:C2H2-type 9	48	2.5236593059936907	0.00732795	ZNF397, ZNF671, ZNF154, ZNF493, ZNF273, ZNF491, ZNF43, ZFP14, MECOM, ZKSCAN7, ZNF429, ZNF84, ZNF548, ZNF768, ZSCAN12, ZNF404, ZNF568, ZNF225, ZNF665, ZNF585B, ZNF445, ZNF169, ZNF345, ZNF223, ZNF586, ZNF443, ZNF585A, ZNF100, ZNF660, ZNF341, ZNF19, ZNF483, ZNF141, ZFP3, ZNF33A, ZNF419, ZFP62, ZNF814, ZNF418, ZNF439, ZFP64, ZNF337, ZNF436, ZNF776, ZNF552, ZNF431, ZNF233, ZNF211	1627	413	20583	1.4703214966567504	1	1	1
BIOCARTA	h_thelperPathway:T Helper Cell Surface Molecules	6	0.31545741324921134	0.0073888	CD2, CD4, THY1, ITGAL, CD3E, ICAM1	186	12	1623	4.362903225806452	0.811499	1	1
REACTOME_PATHWAY	R-HSA-69186~Lagging Strand Synthesis	7	0.36803364879074657	0.0073933	POLD3, POLD4, POLA2, FEN1, RFC4, PCNA, POLD1	1011	20	11009	3.8112265084075174	0.999997	0.17427475279517976	0.1695483169144103
REACTOME_PATHWAY	R-HSA-202424~Downstream TCR signaling	18	0.9463722397476341	0.00744162	HLA-DRB5, CD3E, PSMD9, PSMA3, CD4, PSMB4, PSMC3, PSMD4, PSMC4, PSMA2, PSMB3, LCK, PSMC1, PSME1, PRKCQ, IKBKG, PSMF1, HLA-DRB1	1011	98	11009	2.0000605583479687	0.9999976108094127	0.17427475279517976	0.1695483169144103
GOTERM_BP_DIRECT	GO:0009060~aerobic respiration	13	0.6834910620399579	0.00750351	NDUFA9, NDUFA7, NDUFB7, NDUFB10, NDUFA5, NDUFA12, NDUFB3, NDUFA1, UQCRH, BLOC1S1, NDUFS5, NDUFAB1, MTFR2	1566	68	19462	2.375910900758771	0.9999999999999999	1	0.9985723026718336
UP_SEQ_FEATURE	DOMAIN:Ig-like C2-type 7	7	0.36803364879074657	0.0075328	VCAM1, MYBPC2, NPHS1, FLT4, IGSF1, ICAM5, CD101	1627	23	20583	3.850271238074878	1	1	1
REACTOME_PATHWAY	R-HSA-110313~Translesion synthesis by Y family DNA polymerases bypasses lesions on DNA template	10	0.5257623554153523	0.00754813	POLD3, POLD4, RFC4, PCNA, UBA7, POLD1, REV3L, TRIM25, ISG15, UBE2L6	1011	39	11009	2.792107332166679	0.9999980162562989	0.17441208957387513	0.16968192903724957
GOTERM_BP_DIRECT	GO:0043123~positive regulation of I-kappaB kinase/NF-kappaB signaling	28	1.4721345951629863	0.00758895	CD40, TFRC, SLC44A2, IFIT5, SECTM1, FASLG, HMOX1, TRIM25, CCR7, IKBKG, LGALS9, TRIM21, IKBKE, TRIM22, CD74, UBE2I, PRKCB, F2R, TRAF2, JMJD8, RBX1, BST2, CD4, CTH, S100A4, GAPDH, MYD88, HLA-DRB1	1566	205	19462	1.6974612964520448	0.9999999999999999	1	0.9985723026718336
UP_SEQ_FEATURE	LIPID:S-palmitoyl cysteine	36	1.8927444794952681	0.00760925	IFITM3, GRIA2, IFITM1, CD151, IFITM2, TFRC, RGS16, STMN3, AKAP5, SMPD3, GNA13, PRDX5, RAB40B, CCKAR, GRK6, MAP6, SEC61B, S1PR2, CCR5, GOLGA7, GRIA3, PAG1, LYPLA2, OPN3, PDE2A, PPP1R16A, SOD1, CLIP3, CD4, RAP2B, LCK, GPRIN1, CD7, CD9, TNFRSF21, CDC42SE2	1627	289	20583	1.5758895625931777	1	1	1
BBID	73.Integrins_and_other_cell-surface_receptors	7	0.36803364879074657	0.00764899	CD151, CD82, TSPAN4, CD9, CD37, SLC3A2, CD14	61	13	388	3.4249684741488022	0.42468876151628987	0.5430780591630449	0.5430780591630449
GOTERM_CC_DIRECT	GO:0101031~chaperone complex	8	0.4206098843322818	0.00789005	UXT, STIP1, CCDC47, DNAJB11, SPAG1, PIH1D2, PFDN2, PDRG1	1642	30	20660	3.3552578156719446	0.9992713135655704	0.378723	0.3741546787802207
REACTOME_PATHWAY	R-HSA-69202~Cyclin E associated events during G1/S transition	16	0.8412197686645636	0.007921	LIN37, PSMD9, PSMA3, PSMB4, PSMC3, CCNE2, PSMD4, CCNE1, PSMC4, PSMA2, CDK4, PSMB3, PSMC1, E2F1, PSME1, PSMF1	1011	83	11009	2.099126476231335	0.999999	0.1806195346965591	0.17572102452302285
REACTOME_PATHWAY	R-HSA-5658442~Regulation of RAS by GAPs	14	0.7360672975814931	0.00809175	RASAL3, RBX1, PSMD9, PSMA3, PSMB4, SYNGAP1, PSMC3, PSMD4, PSMC4, PSMA2, PSMB3, PSMC1, PSME1, PSMF1	1011	68	11009	2.241897946122069	0.9999992324402581	0.18211696425877258	0.17717784289687857
GOTERM_CC_DIRECT	GO:0071753~IgM immunoglobulin complex	4	0.2103049421661409	0.00833096	IGHM, IGLC7, IGLC6, IGLC3	1642	6	20660	8.388144539179862	0.9995141760518915	0.379892	0.37530990539822995
UP_SEQ_FEATURE	REPEAT:Hemopexin	6	0.31545741324921134	0.00846142	MMP11, MMP14, MMP24, MMP15, MMP1, MMP2	1627	17	20583	4.465020427347337	1	1	1
REACTOME_PATHWAY	R-HSA-68962~Activation of the pre-replicative complex	9	0.47318611987381703	0.00848556	CDT1, POLA2, CDC45, DBF4, ORC1, GMNN, MCM3, MCM6, MCM2	1011	33	11009	2.9697868896681956	0.9999996143095995	0.18853183946881535	0.18341874284155954
GOTERM_BP_DIRECT	GO:0032020~ISG15-protein conjugation	4	0.2103049421661409	0.00862384	HERC5, UBA7, ISG15, UBE2L6	1566	6	19462	8.285227756492125	1	1	0.9985723026718336
GOTERM_BP_DIRECT	GO:0010950~positive regulation of endopeptidase activity	5	0.26288117770767616	0.00867844	APH1A, PSENEN, PRELID1, APH1B, PSME1	1566	11	19462	5.649018924880994	1	1	0.9985723026718336
GOTERM_BP_DIRECT	GO:0035456~response to interferon-beta	5	0.26288117770767616	0.00867844	IFITM3, BST2, IFITM1, IFITM2, IKBKE	1566	11	19462	5.649018924880994	1	1	0.9985723026718336
GOTERM_BP_DIRECT	GO:0051256~mitotic spindle midzone assembly	5	0.26288117770767616	0.00867844	MAP10, RACGAP1, PRC1, CDCA8, BIRC5	1566	11	19462	5.649018924880994	1	1	0.9985723026718336
GOTERM_BP_DIRECT	GO:0002819~regulation of adaptive immune response	5	0.26288117770767616	0.00867844	IL4I1, IRF7, CD48, FCGR2B, ADCY7	1566	11	19462	5.649018924880994	1	1	0.9985723026718336
GOTERM_BP_DIRECT	GO:0035723~interleukin-15-mediated signaling pathway	5	0.26288117770767616	0.00867844	STAT5A, IL15RA, CD4, IL2RB, IL2RG	1566	11	19462	5.649018924880994	1	1	0.9985723026718336
REACTOME_PATHWAY	R-HSA-69183~Processive synthesis on the lagging strand	6	0.31545741324921134	0.00884207	POLD3, POLD4, POLA2, FEN1, PCNA, POLD1	1011	15	11009	4.35569	0.9999997931875838	0.19081189931392722	0.18563696609537295
REACTOME_PATHWAY	R-HSA-180585~Vif-mediated degradation of APOBEC3G	12	0.6309148264984227	0.00887659	PSMD9, PSMA3, PSMB4, PSMC3, PSMD4, PSMA2, PSMC4, PSMB3, PSMC1, PSME1, PSMF1, RBX1	1011	54	11009	2.419826354544455	0.9999998053008529	0.19081189931392722	0.18563696609537295
REACTOME_PATHWAY	R-HSA-5683057~MAPK family signaling cascades	44	2.3133543638275498	0.00893986	RASGRF1, ARAF, IRS2, RASAL3, IL2RG, FGF2, ACTB, PPP2CA, PPP1CB, DNAJB1, PSMD9, FGF7, PSMB4, SYNGAP1, RASGEF1A, PSMD4, FGF9, PSMB3, PSMF1, CAMK2G, IL6R, GOLGA7, SPTBN2, DUSP4, FGA, ANGPT1, FN1, PPP2R5D, GFRA3, DUSP8, GRIN2D, DUSP7, RBX1, PSMA3, MRAS, PSMC3, ABHD17A, PSMC4, PSMA2, PSMC1, IL2RB, PSME1, PRKCQ, PTPN7	1011	325	11009	1.4742326713840066	1	0.19081189931392722	0.18563696609537295
REACTOME_PATHWAY	R-HSA-4086400~PCP/CE pathway	17	0.8937960042060988	0.00902861	PRKCB, WNT5A, FZD8, CLTA, PSMD9, PSMA3, PSMB4, PSMC3, PSMD4, PSMC4, PSMA2, PSMB3, PSMC1, AP2S1, PSME1, RAC3, PSMF1	1011	92	11009	2.012138218724466	1	0.19081189931392722	0.18563696609537295
INTERPRO	IPR003987:Intercellular adhesion molecule/vascular cell adhesion molecule, N-terminal	4	0.2103049421661409	0.00923177	VCAM1, ICAM2, ICAM5, ICAM1	1577	6	19129	8.086662439230606	0.9999999940987779	1	1
GOTERM_CC_DIRECT	GO:0001772~immunological synapse	10	0.5257623554153523	0.0092517	IL4I1, STOML2, CD6, LCK, CRTAM, PRKCQ, CD37, CD3E, HLA-DRB1, ICAM1	1642	46	20660	2.735264523645607	0.9997917605180218	0.40178802583029277	0.3969418983257607
GOTERM_BP_DIRECT	GO:0032543~mitochondrial translation	16	0.8412197686645636	0.00951609	MRPS28, NDUFA7, MRPS35, MRPS14, MRPL16, MRPL17, MRPS21, MRPL36, MRPL48, MRPL13, MRPL24, MRPL22, MRPL44, MRPL51, MTG1, MRPL9	1566	96	19462	2.071306939123031	1	1	0.9985723026718336
REACTOME_PATHWAY	R-HSA-8852276~The role of GTSE1 in G2/M progression after G2 checkpoint	15	0.7886435331230284	0.00958898	PLK1, CCNB2, PSMD9, PSMA3, PSMB4, PSMC3, PSMD4, PSMC4, PSMA2, PSMB3, PSMC1, TUBB1, PSME1, PSMF1, GTSE1	1011	77	11009	2.1212763497629967	0.9999999439981583	0.2002131916507069	0.19478328974211878
INTERPRO	IPR003597:Immunoglobulin C1-set	14	0.7360672975814931	0.00977534	IGHM, HLA-DRB5, IGLC7, IGLC6, HLA-C, TAPBPL, SIRPB1, IGLL5, IGLC3, TRDC, IGLC2, B2M, HLA-DRB1, MICB	1577	77	19129	2.205453392517438	0.9999999980768003	1	1
REACTOME_PATHWAY	R-HSA-69656~Cyclin A:Cdk2-associated events at S phase entry	16	0.8412197686645636	0.00986214	LIN37, PSMD9, PSMA3, PSMB4, PSMC3, CCNE2, PSMD4, CCNE1, PSMC4, PSMA2, CDK4, PSMB3, PSMC1, E2F1, PSME1, PSMF1	1011	85	11009	2.0497352650258915	0.9999999652790565	0.20346532380002813	0.19794722211589583
GOTERM_BP_DIRECT	GO:0033209~tumor necrosis factor-mediated signaling pathway	14	0.7360672975814931	0.00996666	EIF5A, KRT8, TRAF2, TNFRSF13C, COMMD7, TNFSF13B, PYCARD, PSMA3, PSMB4, KRT18, AIM2, PSMA2, PSMB3, CDIP1	1566	79	19462	2.202402315016894	1	1	0.9985723026718336
GOTERM_BP_DIRECT	GO:0000079~regulation of cyclin-dependent protein serine/threonine kinase activity	11	0.5783385909568874	0.010050262154196864	HERC5, CCNB2, CDKN2C, CCND2, CCNE2, CCNE1, SFN, PKMYT1, GTPBP4, ACTB, CDKN3	1566	54	19462	2.5316	1	1	0.9985723026718336
INTERPRO	IPR018486:Hemopexin, conserved site	6	0.31545741324921134	0.010076813363952261	MMP11, MMP14, MMP24, MMP15, MMP1, MMP2	1577	17	19129	4.28117	0.9999999989675767	1	1
GOTERM_BP_DIRECT	GO:0035987~endodermal cell differentiation	8	0.4206098843322818	0.010141	MMP14, HSBP1, MMP15, MMP2, LAMA3, FN1, COL8A1, INHBA	1566	31	19462	3.2071849379969515	1	1	0.9985723026718336
GOTERM_BP_DIRECT	GO:0036258~multivesicular body assembly	8	0.4206098843322818	0.010141	HGS, VPS4A, CHMP3, CHMP4A, VPS37B, VPS25, VPS28, CHMP5	1566	31	19462	3.2071849379969515	1	1	0.9985723026718336
REACTOME_PATHWAY	R-HSA-174113~SCF-beta-TrCP mediated degradation of Emi1	12	0.6309148264984227	0.010201679020771149	CDC20, PSMD9, PSMA3, PSMB4, PSMC3, PSMD4, PSMA2, PSMC4, PSMB3, PSMC1, PSME1, PSMF1	1011	55	11009	2.3758295117345565	0.9999999808374531	0.20557569468600467	0.20000035847697858
REACTOME_PATHWAY	R-HSA-8941858~Regulation of RUNX3 expression and activity	12	0.6309148264984227	0.010201679020771149	PSMD9, PSMA3, PSMB4, PSMC3, PSMD4, PSMA2, PSMC4, PSMB3, PSMC1, PSME1, PSMF1, RUNX3	1011	55	11009	2.3758295117345565	0.9999999808374531	0.20557569468600467	0.20000035847697858
GOTERM_BP_DIRECT	GO:0046597~negative regulation of viral entry into host cell	7	0.36803364879074657	0.010204744262316691	IFITM3, CD74, IFITM1, IFITM2, TRIM25, TRIM59, LY6E	1566	24	19462	3.6247871434653045	1	1	0.9985723026718336
GOTERM_CC_DIRECT	GO:0005796~Golgi lumen	17	0.8937960042060988	0.010247108056369695	MUC16, SDC4, SDC2, RHBDF2, MUC19, WNT5A, PRELP, MUC5B, MUC5AC, MMP11, F7, MMP14, F8, MUC12, SDC1, GPC4, GAS6	1642	107	20660	1.9990437920475372	0.9999167426087869	0.4247892067004164	0.4196656526722316
REACTOME_PATHWAY	R-HSA-73893~DNA Damage Bypass	11	0.5783385909568874	0.010519823466754744	POLD3, POLD4, RFC4, PCNA, UBA7, POLD1, REV3L, TRIM25, ISG15, UBE2L6, RBX1	1011	48	11009	2.4954459281239694	0.9999999890225714	0.20955	0.2038669237350402
KEGG_PATHWAY	hsa04932:Non-alcoholic fatty liver disease	24	1.2618296529968454	0.010697252677866021	NDUFA9, NDUFA7, NDUFB7, PRKAA2, NDUFB10, NDUFA5, NDUFA12, COX4I1, NDUFB3, NDUFA1, FASLG, TRAF2, IRS2, UQCR10, COX5B, COX6A1, COX5A, UQCRH, COX6B1, CASP7, UQCRQ, NDUFS5, NDUFAB1, IL6R	770	155	8586	1.7265521575198994	0.9739021982232382	0.18131843288982905	0.17329549338142952
UP_KW_DISEASE	KW-0248~Ehlers-Danlos syndrome	6	0.31545741324921134	0.010900135827553182	COL1A1, COL3A1, TNXB, COL1A2, FKBP14, B3GALT6	399	17	4728	4.182220256523662	0.6766039962023125	0.5613569951189888	0.5613569951189888
REACTOME_PATHWAY	R-HSA-5668541~TNFR2 non-canonical NF-kB pathway	18	0.9463722397476341	0.011052972091165014	CD40, FASLG, TRAF2, TNFRSF13C, TNFSF13B, PSMD9, PSMA3, PSMB4, PSMC3, PSMD4, PSMC4, PSMA2, PSMB3, PSMC1, PSME1, CD27, TNFRSF8, PSMF1	1011	102	11009	1.9216268109617736	0.9999999956861969	0.2176681890226019	0.21176489711027516
UP_SEQ_FEATURE	ZN_FING:C2H2-type 8	51	2.6813880126182967	0.011066667168505673	ZNF491, ZNF43, SALL2, MECOM, ZNF84, ZNF768, ZNF404, ZNF568, ZNF445, ZNF169, ZNF443, ZNF19, ZNF483, ZFP3, ZSCAN22, ZNF439, ZNF436, ZNF552, ZNF431, ZNF233, ZNF397, ZNF671, ZNF154, ZFP14, ZKSCAN7, ZNF429, ZNF548, ZSCAN12, ZNF665, ZNF225, ZNF585B, ZNF620, ZNF345, ZNF586, ZNF223, ZNF585A, ZNF100, ZNF584, ZNF660, ZNF341, ZNF141, ZNF33A, ZNF419, ZFP62, ZNF814, ZNF418, ZFP64, ZNF337, ZNF776, ZNF577, ZNF2…	1627	455	20583	1.4180119818718466	1	1	1
GOTERM_BP_DIRECT	GO:0042110~T cell activation	12	0.6309148264984227	0.0110786	CD2, CD84, CD4, LAG3, IRF4, CD7, SLAMF7, CD48, SLAMF6, CD3E, SLA2, RBX1	1566	63	19462	2.3672079304263214	1	1	0.9985723026718336
GOTERM_CC_DIRECT	GO:0005773~vacuole	6	0.31545741324921134	0.011215020459582106	CLN3, CD74, GLB1, GGH, TMEM208, MST1R	1642	18	20660	4.194072269589931	0.999966	0.4446999417016904	0.43933623626449897
UP_KW_BIOLOGICAL_PROCESS	KW-0399~Innate immunity	51	2.6813880126182967	0.011307219431780835	IFITM3, FCN2, CD84, IFITM1, IFITM2, IFIT5, OASL, PYCARD, HERC5, TRIM25, ZBP1, FGA, RBM14, RSAD2, SYK, HLA-C, MIF, SIRT2, AIM2, IFI27, OAS2, OAS3, IRF7, SERPING1, GAPDH, RNF166, NAIP, MST1R, SLAMF7, SLAMF6, CD14, KLRC1, SLC15A3, GBP4, APOBEC3D, IGLC7, APOBEC3H, MX2, MX1, ISG15, PML, BST2, MFHAS1, CD6, TTC4, POLR3G, KLRD1, SERINC3, MYD88, MSRB1, C1QC	980	420	11376	1.4095626822157434	0.8183629488407498	0.20957691517323732	0.20259101800079607
REACTOME_PATHWAY	R-HSA-69205~G1/S-Specific Transcription	8	0.4206098843322818	0.011385108240027472	CDT1, PCNA, CDC45, LIN37, ORC1, CCNE1, E2F1, TK1	1011	28	11009	3.1112053129857284	0.9999999975898305	0.22155262558941877	0.2155439854262897
UP_SEQ_FEATURE	ZN_FING:C2H2-type 11	38	1.9978969505783386	0.0114821	ZNF154, ZNF493, ZNF273, ZNF491, ZNF43, ZFP14, ZNF429, ZNF84, ZNF548, ZSCAN12, ZNF404, ZNF568, ZNF225, ZNF665, ZNF585B, ZNF445, ZNF345, ZNF586, ZNF443, ZNF585A, ZNF100, ZNF341, ZNF483, ZNF141, ZFP3, ZNF33A, ZNF419, ZFP62, ZNF814, ZNF418, ZNF439, ZFP64, ZNF337, ZNF436, ZNF776, ZNF431, ZNF233, ZNF211	1627	318	20583	1.5117417170159222	1	1	1
REACTOME_PATHWAY	R-HSA-163200~Respiratory electron transport, ATP synthesis by chemiosmotic coupling, and heat production by uncoupling proteins.	21	1.1041009463722398	0.011505906695353542	NDUFA9, NDUFA7, NDUFB7, NDUFB10, NDUFA5, NDUFA12, TACO1, COX4I1, NDUFB3, NDUFA1, UQCR10, COX5B, COX6A1, COX5A, UQCRH, COX6B1, NDUFAF6, UQCRQ, NDUFS5, NDUFAB1, NDUFAF2	1011	127	11009	1.800579452790953	0.9999999980498046	0.22155262558941877	0.2155439854262897
UP_SEQ_FEATURE	DNA_BIND:H-T-H motif	7	0.36803364879074657	0.011539903744496576	TIGD3, TIGD4, ZZZ3, DMTF1, TIGD6, DNTTIP1, MYBL2	1627	25	20583	3.5422495390288877	1	1	1
UP_SEQ_FEATURE	DOMAIN:SRCR	7	0.36803364879074657	0.011539903744496576	PGBD1, LGALS3BP, CD6, TMPRSS3, TMPRSS4, TMPRSS2, PRSS12	1627	25	20583	3.5422495390288877	1	1	1
REACTOME_PATHWAY	R-HSA-3781865~Diseases of glycosylation	23	1.2092534174553102	0.011746933664194421	CTSA, CHST6, SPON1, MUC16, SDC4, SDC2, MUC19, C1GALT1, ALG2, ALG3, MOGS, B3GALT6, PRELP, MUC5B, THBS2, THBS1, MUC5AC, ADAMTS20, GLB1, MUC12, SDC1, GPC4, GALK1	1011	144	11009	1.7392501923288273	0.9999999987219744	0.22370808835218606	0.21764099074540436
GOTERM_CC_DIRECT	GO:0005761~mitochondrial ribosome	7	0.36803364879074657	0.011837499114028743	NDUFA7, MRPL51, MTG1, MRPS14, MRPL48, MRPL9, MRPL13	1642	25	20660	3.5230207064555423	0.999981	0.4476099491977009	0.4422111449858866
KEGG_PATHWAY	hsa05144:Malaria	11	0.5783385909568874	0.011886799251071249	COMP, CD40, VCAM1, SDC2, CCL2, SDC1, THBS2, ITGAL, THBS1, MYD88, ICAM1	770	50	8586	2.453142857142857	0.9826431166381306	0.19188690219586443	0.18339633130224212
REACTOME_PATHWAY	R-HSA-156711~Polo-like kinase mediated events	6	0.31545741324921134	0.0119064	CCNB2, LIN37, PLK1, MYBL2, PKMYT1, FOXM1	1011	16	11009	4.083456973293768	0.9999999990337669	0.22428038111884946	0.21819776258879411
REACTOME_PATHWAY	R-HSA-1236978~Cross-presentation of soluble exogenous antigens (endosomes)	11	0.5783385909568874	0.012161390728196213	PSMD9, PSMA3, PSMB4, PSMC3, PSMD4, PSMA2, PSMC4, PSMB3, PSMC1, PSME1, PSMF1	1011	49	11009	2.4445184602030725	0.9999999993822231	0.2266203239996133	0.22047424481439584
GOTERM_BP_DIRECT	GO:0043030~regulation of macrophage activation	5	0.26288117770767616	0.012199395420044173	MFHAS1, CD74, CD84, MIF, SNCA	1566	12	19462	5.178267347807578	1	1	0.9985723026718336
GOTERM_CC_DIRECT	GO:0005793~endoplasmic reticulum-Golgi intermediate compartment	14	0.7360672975814931	0.01227	TMED9, KDELR1, CCDC115, FN1, PDIA6, YIF1A, SMO, MGAT4B, SERPINH1, TRIP11, TMED2, NUCB1, P4HB, TMED7	1642	82	20660	2.1481833575948426	0.9999871152711031	0.4476099491977009	0.4422111449858866
GOTERM_BP_DIRECT	GO:0032760~positive regulation of tumor necrosis factor production	17	0.8937960042060988	0.012446547224052001	CD84, SYK, WNT5A, MIF, THBS1, SPN, CD2, PYCARD, FCGR3A, OAS2, FRMD8, DDT, OAS3, TNFRSF8, CD14, LGALS9, MYD88	1566	108	19462	1.9562343313939738	1	1	0.9985723026718336
REACTOME_PATHWAY	R-HSA-4608870~Asymmetric localization of PCP proteins	13	0.6834910620399579	0.012486912615859174	WNT5A, FZD8, PSMD9, PSMA3, PSMB4, PSMC3, PSMD4, PSMC4, PSMA2, PSMB3, PSMC1, PSME1, PSMF1	1011	64	11009	2.211872527200791	0.9999999996510395	0.23021084641791437	0.22396739010998476
GOTERM_BP_DIRECT	GO:0060907~positive regulation of macrophage cytokine production	7	0.36803364879074657	0.012533	PANX1, PYCARD, CD74, SEMA7A, WNT5A, LAPTM5, MYD88	1566	25	19462	3.4797956577266924	1	1	0.9985723026718336
UP_KW_BIOLOGICAL_PROCESS	KW-0945~Host-virus interaction	76	3.995793901156677	0.012574614910394239	ACY3, TFRC, AUP1, ITGAL, ICAM1, LAMP3, CFL1, TRIM25, IKBKG, CCR5, IKBKE, TRIM21, PAAF1, TRIM22, HTATIP2, ZBP1, RSAD2, SYK, MMP1, KRT8, HLA-C, YWHAZ, RBX1, PSMA3, IFI27, TBC1D20, LCK, CDHR3, MXRA8, IRF7, BIRC5, SLC25A5, GAS6, PPIA, TNFRSF21, LY6E, CD151, PCNA, TMPRSS4, DERL1, CXCR4, TMPRSS2, FBLN1, IL2RG, LRP8, PSMB4, SYNGR2, PSMB3, TSPAN7, E2F1, HMOX1, BAK1, APOE, KLRC1, RAB6A, BUB1, MICB, AP1M1,…	980	677	11376	1.3031320652337746	0.8501546729188453	0.20957691517323732	0.20259101800079607
GOTERM_MF_DIRECT	GO:0042802~identical protein binding	167	8.780231335436381	0.012672297442593287	CD84, TFRC, NAB2, IKZF1, APEH, FGF2, ACTB, PYCARD, PSMD4, RASSF3, UBASH3B, FGFR1OP2, DPYSL3, TMEM38A, TMEM38B, HADH, B2M, TRIM21, TRIM22, ZBP1, KCNH2, G6PD, TSPYL1, CSNK2A1, COL23A1, LMO2, ACYP2, MAT1A, MIF, MID1, DDX39A, IFI27, DDX39B, SOAT1, S100A4, CHMP4A, PDE9A, SNRPA, FTL, PMEL, MAOB, SDC4, PEF1, HVCN1, SDC2, CLCNKA, FBLN1, RASAL3, PGBD1, CD79B, PRDX4, IRAK2, ZNHIT6, PRDX1, HMOX1, SLAMF7, SF…	1539	1737	18976	1.1854485357298232	0.9999999896907448	1	0.9993060374739764
UP_KW_CELLULAR_COMPONENT	KW-0647~Proteasome	11	0.5783385909568874	0.012854647847065834	PSMA3, PSMB4, PSMC3, PSMD4, PSMA2, PSMC4, PSMB3, PSMC1, PSME1, PSMF1, PAAF1	1461	55	17831	2.440930869267625	0.5398850945980351	0.12854647847065834	0.11783427193143681
KEGG_PATHWAY	hsa05202:Transcriptional misregulation in cancer	28	1.4721345951629863	0.012918878040468554	CD40, PRCC, TMPRSS2, BMI1, HOXA11, CCND2, PLAU, NFKBIZ, TSPAN7, ITGB7, BAK1, CD14, GRIA3, CDKN2C, GADD45B, JUP, EYA1, LMO2, PBX3, PAX5, MLF1, PML, PER2, MEIS1, WT1, ID2, IL2RB, NUPR1	770	193	8586	1.6177107866227036	0.9878209107585758	0.19906816616903816	0.19025984023235507
REACTOME_PATHWAY	R-HSA-6799198~Complex I biogenesis	12	0.6309148264984227	0.013301922385953057	NDUFA9, NDUFA7, NDUFB7, NDUFAF6, NDUFA5, NDUFB10, NDUFA12, NDUFS5, NDUFAB1, NDUFB3, NDUFA1, NDUFAF2	1011	57	11009	2.292467072726326	0.9999999999165626	0.2401274114047567	0.23361501190330056
REACTOME_PATHWAY	R-HSA-4641258~Degradation of DVL	12	0.6309148264984227	0.013301922385953057	PSMD9, PSMA3, PSMB4, PSMC3, PSMD4, PSMA2, PSMC4, PSMB3, PSMC1, PSME1, PSMF1, RBX1	1011	57	11009	2.292467072726326	0.9999999999165626	0.2401274114047567	0.23361501190330056
GOTERM_BP_DIRECT	GO:0032981~mitochondrial respiratory chain complex I assembly	12	0.6309148264984227	0.013910126097597598	NDUFA9, NDUFB7, NDUFAF6, NDUFA5, NDUFB10, NDUFA12, NDUFS5, NDUFAB1, NDUFB3, NDUFA1, NDUFAF2, TMEM126A	1566	65	19462	2.29437	1	1	0.9985723026718336
UP_SEQ_FEATURE	CARBOHYD:C-linked (Man) tryptophan	6	0.31545741324921134	0.013933131419462357	SPON1, IGLC7, IL21R, MUC5B, THBS1, MUC5AC	1627	19	20583	3.995018277100249	1	1	1
REACTOME_PATHWAY	R-HSA-211733~Regulation of activated PAK-2p34 by proteasome mediated degradation	11	0.5783385909568874	0.013988832530627285	PSMD9, PSMA3, PSMB4, PSMC3, PSMD4, PSMA2, PSMC4, PSMB3, PSMC1, PSME1, PSMF1	1011	50	11009	2.395628090999011	0.9999999999750415	0.24992419356265036	0.24314609944987217
GOTERM_BP_DIRECT	GO:0070106~interleukin-27-mediated signaling pathway	4	0.2103049421661409	0.014194839470986147	OAS2, MX1, IL27RA, OASL	1566	7	19462	7.101623791278964	1	1	0.9985723026718336
GOTERM_CC_DIRECT	GO:0015630~microtubule cytoskeleton	26	1.3669821240799158	0.014228105212321747	ZNF397, SHMT2, CDCA8, KATNB1, HMMR, PPP2CA, CCNB2, TUBB1, FAM83D, GTSE1, PLK1, HAUS3, MTUS2, HYPK, TPX2, THAP6, PSRC1, PRC1, CDC42EP4, BIRC5, MAPRE3, KIF2C, PTPN7, KIFC3, TMEM9, GAPDH	1642	198	20660	1.6522102880202756	0.9999978908577236	0.45146994235151544	0.4460245812047318
GOTERM_CC_DIRECT	GO:0005819~spindle	21	1.1041009463722398	0.014355564869346502	RGS14, PLK1, CBX1, MAD2L1BP, CLTA, KATNB1, TTK, HMMR, TUBG1, MID1, SIRT2, CDC20, TPX2, PSRC1, RACGAP1, PRC1, BIRC5, KIF2C, KIF20A, FAM83D, ARL8A	1642	149	20660	1.7733325703635279	0.9999981254797933	0.45146994235151544	0.4460245812047318
GOTERM_MF_DIRECT	GO:0008379~thioredoxin peroxidase activity	4	0.2103049421661409	0.014505275107055597	PRDX5, PRDX4, PRDX1, PRDX6	1539	7	18976	7.045762554534484	0.9999999992928585	1	0.9993060374739764
GOTERM_MF_DIRECT	GO:0051920~peroxiredoxin activity	4	0.2103049421661409	0.014505275107055597	PRDX5, PRDX4, PRDX1, PRDX6	1539	7	18976	7.045762554534484	0.9999999992928585	1	0.9993060374739764
KEGG_PATHWAY	hsa05166:Human T-cell leukemia virus 1 infection	31	1.6298633017875919	0.014507393098889973	CD40, SLC2A1, TNFRSF13C, CD3E, ITGAL, IL2RG, ADCY7, ANAPC11, ICAM1, CDC20, CCNB2, CCND2, PTTG1, E2F1, E2F2, IKBKG, B2M, STAT5A, IL15RA, HLA-DRB5, CDKN2C, HLA-C, CD4, CCNE2, CCNE1, LCK, CDK4, IL2RB, SLC25A5, RAN, HLA-DRB1	770	222	8586	1.5570726570726572	0.9929450713387498	0.2138263591532044	0.20436501582784136
REACTOME_PATHWAY	R-HSA-162909~Host Interactions of HIV factors	21	1.1041009463722398	0.014693345807621815	ARF1, RBX1, PSMD9, PSMA3, CD4, PSMB4, PSMC3, PSMD4, PSMC4, PSMA2, PSMB3, LCK, PSMC1, AP2S1, PSME1, PSMF1, SLC25A5, PPIA, B2M, RAN, AP1M1	1011	130	11009	1.759027619265008	0.9999999999927679	0.2598323294347817	0.2527855207311263
UP_KW_MOLECULAR_FUNCTION	KW-0378~Hydrolase	162	8.517350157728707	0.014738434067465285	ACAA2, CLPB, AMY2B, DQX1, APEH, LIPA, ACTB, PPP1CB, ZC3H12D, IL18RAP, UBASH3B, PLAU, MACROD1, CDKL3, USP8, USP6, ENTPD2, PPTC7, SLX1B, ENTPD5, VASH2, ACYP2, MOGS, RNASE1, PLA2G15, PHOSPHO2, DDX39A, ADAM15, DDX39B, NAAA, ACOT1, PADI2, ADAM8, STAMBP, PDE9A, PLA1A, PFKFB2, RASL12, RNASEH2A, RAB5C, PLA2G7, RPAP2, NUGGC, DPP6, FIGNL1, RHBDL1, LHPP, CTSA, APOBEC3D, FANCM, APOBEC3H, EPHX1, PDE2A, GGH, L…	909	1797	11871	1.1773087158465427	0.7767940772217388	0.7442909204069968	0.7442909204069968
UP_SEQ_FEATURE	ZN_FING:C2H2-type 5	61	3.207150368033649	0.0148061	ZNF493, ZNF491, GFI1, ZNF43, IKZF1, SALL2, MECOM, ZNF84, ZNF768, ZNF404, ZNF568, ZNF445, ZNF169, ZNF443, ZNF587B, ZNF19, ZNF483, ZFP3, ZSCAN22, ZNF439, ZSCAN23, ZNF436, ZNF552, ZNF431, ZNF397, ZNF232, ZNF671, ZNF154, ZNF273, GLIS2, ZFP14, ZKSCAN7, ZNF429, ZNF548, ZSCAN12, ZNF665, ZNF225, ZNF585B, ZNF620, ZNF785, ZNF345, ZNF586, ZNF223, ZNF585A, ZNF100, ZNF584, ZNF660, ZNF341, ZNF141, ZNF33A, ZNF4…	1627	572	20583	1.349133503251512	1	1	1
GOTERM_BP_DIRECT	GO:0050868~negative regulation of T cell activation	6	0.31545741324921134	0.0149672	IL4I1, GPNMB, LAPTM5, TIGIT, LAX1, PAG1	1566	19	19462	3.9245815688646903	1	1	0.9985723026718336
GOTERM_BP_DIRECT	GO:0030574~collagen catabolic process	9	0.47318611987381703	0.015009315464322605	MMP11, MMP14, MMP24, ADAM15, MMP15, MMP1, MMP2, PEPD, CTSB	1566	41	19462	2.728062797869358	1	1	0.9985723026718336
UP_KW_BIOLOGICAL_PROCESS	KW-0159~Chromosome partition	10	0.5257623554153523	0.015071277083460418	DSN1, UBE2I, PTTG1, RAD21L1, BIRC5, KIF2C, SLC25A5, BUB1, REC8, ARL8A	980	46	11376	2.5235137533274177	0.8975008161058031	0.2180731529392498	0.2108040478412748
GOTERM_CC_DIRECT	GO:0005881~cytoplasmic microtubule	11	0.5783385909568874	0.015152248078825058	MAP10, SNPH, RAB3D, REEP2, MTUS2, BIRC5, SRPRB, KIF2C, TUBG1, GTSE1, MID1	1642	58	20660	2.386282498214961	0.9999991033617068	0.45146994235151544	0.4460245812047318
GOTERM_CC_DIRECT	GO:0000502~proteasome complex	11	0.5783385909568874	0.015152248078825058	PSMA3, PSMB4, PSMC3, PSMD4, PSMA2, PSMC4, PSMB3, PSMC1, PSME1, PSMF1, PAAF1	1642	58	20660	2.386282498214961	0.9999991033617068	0.45146994235151544	0.4460245812047318
SMART	SM00407:IGc1	13	0.6834910620399579	0.015331758085782205	IGHM, HLA-DRB5, IGLC7, IGLC6, HLA-C, TAPBPL, SIRPB1, IGLL5, IGLC3, IGLC2, B2M, HLA-DRB1, MICB	842	74	10366	2.1627720356936506	0.9970920031655327	1	1
REACTOME_PATHWAY	R-HSA-109582~Hemostasis	74	3.890641430073607	0.015338955036790093	LGALS3BP, CD84, SPARC, ITGAL, ACTB, SLC8A2, SPN, ISLR, PLAU, TUBB1, CFL1, KIF5A, PHACTR2, SLC16A3, SRGN, FGA, PTGIR, SYK, PRKCB, MMP1, F2R, PPP2R5D, MIF, ATP1B2, ADRA2C, YWHAZ, SLC7A5, F7, F8, LCK, KIFC1, SERPING1, CD48, PDE5A, PRKCQ, TAGLN2, KIF2C, KIF20A, GAS6, ALDOA, PPIA, PDE9A, SDC4, SDC2, PRCP, PLG, SLC3A2, THBS1, LRP8, PIK3R5, PPP2CA, GNA13, CYB5R1, KLC3, RACGAP1, TSPAN7, S100A10, CD74, AN…	1011	621	11009	1.297588045190505	0.9999999999976775	0.26850918261370943	0.26122705244472827
REACTOME_PATHWAY	R-HSA-174437~Removal of the Flap Intermediate from the C-strand	6	0.31545741324921134	0.015618649824342712	POLD3, POLD4, ACD, FEN1, PCNA, POLD1	1011	17	11009	3.8432536219235467	0.9999999999985805	0.26867632967996535	0.26138966638223987
UP_SEQ_FEATURE	INTRAMEM:Helical	9	0.47318611987381703	0.0156609	SMPD3, IFITM3, PSENEN, IFITM1, IFITM2, SLC23A1, SLC5A1, TLCD1, CNNM2	1627	42	20583	2.710905259460883	1	1	1
REACTOME_PATHWAY	R-HSA-69580~p53-Dependent G1/S DNA damage checkpoint	13	0.6834910620399579	0.0158136	PSMD9, PSMA3, PSMB4, PSMC3, CCNE2, PSMD4, CCNE1, PSMC4, PSMA2, PSMB3, PSMC1, PSME1, PSMF1	1011	66	11009	2.1448460869825854	0.9999999999989929	0.26867632967996535	0.26138966638223987
REACTOME_PATHWAY	R-HSA-69563~p53-Dependent G1 DNA Damage Response	13	0.6834910620399579	0.0158136	PSMD9, PSMA3, PSMB4, PSMC3, CCNE2, PSMD4, CCNE1, PSMC4, PSMA2, PSMB3, PSMC1, PSME1, PSMF1	1011	66	11009	2.1448460869825854	0.9999999999989929	0.26867632967996535	0.26138966638223987
GOTERM_CC_DIRECT	GO:0005747~mitochondrial respiratory chain complex I	10	0.5257623554153523	0.015834198624734227	NDUFA9, NDUFA7, NDUFB7, NDUFA5, NDUFB10, NDUFA12, NDUFS5, NDUFAB1, NDUFB3, NDUFA1	1642	50	20660	2.5164433617539586	0.9999995232815146	0.45146994235151544	0.4460245812047318
GOTERM_CC_DIRECT	GO:0034709~methylosome	5	0.26288117770767616	0.015841050608825104	FUT6, SNRPD1, PRMT1, SNRPB, WDR77	1642	13	20660	4.839314157219151	0.9999995262988832	0.45146994235151544	0.4460245812047318
GOTERM_CC_DIRECT	GO:0071735~IgG immunoglobulin complex	5	0.26288117770767616	0.015841050608825104	IGLL5, IGLC7, IGLC6, IGLC3, IGLC2	1642	13	20660	4.839314157219151	0.9999995262988832	0.45146994235151544	0.4460245812047318
UP_KW_BIOLOGICAL_PROCESS	KW-0498~Mitosis	37	1.9453207150368035	0.015992031215544985	CDCA8, CLTA, KATNB1, NCAPH, ANAPC11, SKA2, CDC20, CCNB2, DSN1, HAUS8, PTTG1, FAM83D, BUB1, STOX1, CENPT, CDT1, UBE2I, UBE2C, RCC2, PLK1, HAUS3, HAUS5, SIRT2, DCDC1, ZWINT, TPX2, SNRK, PSRC1, SAPCD2, KIFC1, MPLKIP, BIRC5, MAPRE3, KIF2C, SPC24, RAN, ARL8A	980	290	11376	1.4810415200562985	0.9109175149968212	0.2180731529392498	0.2108040478412748
REACTOME_PATHWAY	R-HSA-168249~Innate Immune System	119	6.256572029442692	0.016280559176045997	FCN2, TMEM179B, GMFG, RAB3D, ICAM2, UBE2L6, APEH, ACTB, PYCARD, HERC5, RPS6KA3, PSMD9, PSMD4, PLAU, CFL1, COTL1, TBC1D10C, TRIM25, MAP3K8, CPNE3, B2M, TRIM21, GOLGA7, ZBP1, HLA-C, MIF, UNC13D, SIGIRR, PSME1, TXNIP, SERPING1, PADI2, ADAM8, PRKCQ, PPIA, ARL8A, FTL, RAB5C, UBA7, HVCN1, CNN2, DSN1, PRDX4, COMMD9, IRAK2, HMOX1, PSMF1, CD14, RAB6A, S100A11, AP1M1, MAP2K6, CTSA, MUC16, JUP, MUC19, GGH, …	1011	1068	11009	1.2133118097926554	0.9999999999995576	0.2739243597290069	0.2664953667069277
UP_SEQ_FEATURE	ZN_FING:C2H2-type 6	56	2.9442691903259726	0.016875250255807633	ZNF491, GFI1, ZNF43, IKZF1, SALL2, MECOM, ZNF84, ZNF768, ZNF404, ZNF568, ZNF445, ZNF169, ZNF443, ZNF587B, ZNF19, ZNF483, ZFP3, ZSCAN22, ZNF439, ZNF436, ZNF552, ZNF431, ZNF233, ZNF397, ZNF671, ZNF154, ZNF273, ZFP14, ZKSCAN7, ZNF429, ZNF548, ZSCAN12, ZNF665, ZNF225, ZNF585B, ZNF620, ZNF785, ZNF345, ZNF586, ZNF585A, ZNF100, ZNF584, ZNF660, ZNF341, ZNF141, ZNF33A, ZNF419, ZFP62, ZNF814, ZNF418, ZFP64…	1627	521	20583	1.359788690606099	1	1	1
REACTOME_PATHWAY	R-HSA-9020702~Interleukin-1 signaling	19	0.9989484752891693	0.0169342	TRAF2, USP18, RBX1, PSMD9, PSMA3, PSMB4, PSMC3, PSMD4, PSMC4, IRAK2, PSMA2, PSMB3, PSMC1, PSME1, MAP3K8, IKBKG, PSMF1, MYD88, MAP2K6	1011	115	11009	1.7990882896830518	0.9999999999998602	0.28218286464931497	0.27452989601774086
GOTERM_CC_DIRECT	GO:0035577~azurophil granule membrane	11	0.5783385909568874	0.016984938274915366	BST2, PIGR, RAB5C, TMEM179B, RAB3D, DNAJC5, SLCO4C1, PRCP, CPNE3, ARL8A, CKAP4	1642	59	20660	2.3458370321435207	0.9999998359874874	0.46103352678813675	0.4554728153904728
GOTERM_CC_DIRECT	GO:0005789~endoplasmic reticulum membrane	111	5.83596	0.017187653410961238	KDELR1, SLC35B1, AUP1, CYP4Z1, PIEZO1, PTGFRN, SLC39A1, IL15RA, STARD3, ENTPD2, RSAD2, ACSL6, ALG2, ALG3, ACSL5, MOGS, PDIA6, CYP39A1, IFI27, TBC1D20, SOAT1, ILVBL, GPRIN1, CTAGE9, KDELR2, GRIA2, LRRC59, PMEL, RTN1, RPN2, RETSAT, SLC35D1, TAPBPL, PKMYT1, APH1A, CYB5R1, PTDSS1, APH1B, POM121C, TESPA1, RDH10, HMOX1, OTOF, RAB6A, OST4, SLC37A2, SLC37A1, SRD5A1, EPHX1, TMEM132A, CYP4F12, GRIN2D, ACER…	1642	1135	20660	1.2305075469369577	1	0.46103352678813675	0.4554728153904728
GOTERM_BP_DIRECT	GO:0008584~male gonad development	17	0.8937960042060988	0.017238511018618424	TFAP2C, SRD5A1, WNT5A, TEX11, FANCA, ADAM20, INHBA, HOXA11, ADAM29, AR, MMP14, PRDX4, FGF9, ADAM15, WT1, NUPR1, CSMD1	1566	112	19462	1.886368819558475	1	1	0.9985723026718336
GOTERM_BP_DIRECT	GO:0007080~mitotic metaphase plate congression	9	0.47318611987381703	0.017270965242557487	PSRC1, KIFC1, VPS4A, RRS1, CHMP3, CDCA8, CHMP4A, KIF2C, CHMP5	1566	42	19462	2.6631089217296116	1	1	0.9985723026718336
UP_SEQ_FEATURE	REGION:Necessary for interaction with PNN	3	0.15772870662460567	0.017726783119565916	KRT19, KRT18, KRT8	1627	3	20583	12.650891210817456	1	1	1
KEGG_PATHWAY	hsa05020:Prion disease	36	1.8927444794952681	0.017843952978355435	NDUFB7, NDUFB10, NDUFA12, COX4I1, NDUFB3, UQCR10, COX5B, COX6A1, COX5A, UQCRH, PSMD9, STIP1, KLC3, PSMB4, PSMD4, PSMB3, TUBB1, KIF5A, NDUFA9, NDUFA7, NDUFA5, CSNK2A1, NDUFA1, GRIN2D, SOD1, COX6B1, PSMA3, PSMC3, PSMC4, UQCRQ, PSMA2, PSMC1, NDUFS5, NDUFAB1, SLC25A5, C1QC	770	272	8586	1.4758212375859436	0.9977654618787962	0.25204583581927054	0.24089336520779836
INTERPRO	IPR019956:Ubiquitin subgroup	5	0.26288117770767616	0.017933883952206534	UBL4A, UBTD1, NEDD8, ISG15, FAU	1577	13	19129	4.665382176479197	0.9999999999999999	1	1
REACTOME_PATHWAY	R-HSA-1168372~Downstream signaling events of B Cell Receptor (BCR)	15	0.7886435331230284	0.018106110358136973	PRKCB, PSMD9, PSMA3, PSMB4, PSMC3, PSMD4, PSMC4, PSMA2, PSMB3, PSMC1, PSME1, IKBKG, PSMF1, NFKBIE, PPIA	1011	83	11009	1.9679310714668765	0.9999999999999823	0.2901399838633076	0.2822712133834603
UP_KW_DOMAIN	KW-0732~Signal	394	20.715036803364878	0.018189167443154866	IGHV3-23, DMP1, LIPA, IL4I1, KRTCAP3, ISLR, IGKV1-16, IGKV1-17, IGKV1-12, IGHV3-7, IGHV3-30, RNASE1, IGKV1-27, ERVW-1, SERPING1, FREM1, C5ORF46, RPN2, RETSAT, TAPBPL, THY1, PLA2G7, FAM171A2, PRDX4, SERPINH1, ICOS, HLA-DRB5, IGHV3-11, FN1, FZD8, LYZ, CP, GRIN2D, COL1A1, COL1A2, HLA-DRB1, PIGR, PIGU, QPRT, PRSS27, LRRC32, PRSS22, PRSS23, SMG6, GLT1D1, MMP24, GNLY, TIMP2, CTLA4, RSPO1, TIMP4, CHST6,…	1190	4422	14587	1.0921857481119992	0.43394008285659524	0.18795473024593362	0.18795473024593362
REACTOME_PATHWAY	R-HSA-69601~Ubiquitin Mediated Degradation of Phosphorylated Cdc25A	11	0.5783385909568874	0.018248850687305557	PSMD9, PSMA3, PSMB4, PSMC3, PSMD4, PSMA2, PSMC4, PSMB3, PSMC1, PSME1, PSMF1	1011	52	11009	2.3034885490375103	0.9999999999999862	0.2901399838633076	0.2822712133834603
REACTOME_PATHWAY	R-HSA-69610~p53-Independent DNA Damage Response	11	0.5783385909568874	0.018248850687305557	PSMD9, PSMA3, PSMB4, PSMC3, PSMD4, PSMA2, PSMC4, PSMB3, PSMC1, PSME1, PSMF1	1011	52	11009	2.3034885490375103	0.9999999999999862	0.2901399838633076	0.2822712133834603
REACTOME_PATHWAY	R-HSA-349425~Autodegradation of the E3 ubiquitin ligase COP1	11	0.5783385909568874	0.018248850687305557	PSMD9, PSMA3, PSMB4, PSMC3, PSMD4, PSMA2, PSMC4, PSMB3, PSMC1, PSME1, PSMF1	1011	52	11009	2.3034885490375103	0.9999999999999862	0.2901399838633076	0.2822712133834603
REACTOME_PATHWAY	R-HSA-69613~p53-Independent G1/S DNA damage checkpoint	11	0.5783385909568874	0.018248850687305557	PSMD9, PSMA3, PSMB4, PSMC3, PSMD4, PSMA2, PSMC4, PSMB3, PSMC1, PSME1, PSMF1	1011	52	11009	2.3034885490375103	0.9999999999999862	0.2901399838633076	0.2822712133834603
GOTERM_BP_DIRECT	GO:0030198~extracellular matrix organization	25	1.3144058885383807	0.018255323916513154	FBLN1, DMP1, ITGAE, ITGAL, FBLN2, MMP24, PRDX4, SPOCK2, ITGB7, COL28A1, CSGALNACT1, MMP1, MMP2, COL23A1, ADAMTS20, COL1A1, MMP11, COL3A1, MMP14, COL1A2, MMP15, ITGA11, COL4A5, COL8A1, VWA1	1566	190	19462	1.6352423203602877	1	1	0.9985723026718336
UP_KW_PTM	KW-0449~Lipoprotein	104	5.467928496319663	0.018355098903498977	IFITM3, IFITM1, IFITM2, TFRC, RAB3D, STMN3, SLA2, CHCHD6, GOLGA7, TECTA, WNT5A, PPP1R16A, HPCAL1, PHKA1, CLIP3, RAB32, AR, GPRIN1, LY6E, GRIA2, SEMA7A, CD151, RAB5C, THY1, EFNA5, PRDX5, GRK6, MAP6, APOE, CD14, RAB6A, WNT2, PAG1, GRIA3, APOBEC3D, OPN3, APOBEC3H, PDE2A, BST2, EFNA3, DEGS1, CDC42SE2, ARF1, PRR7, CPO, NAA40, DIRAS1, RPGR, SMPD3, UCHL1, MAP1LC3A, CCKAR, AIFM2, PHACTR2, RAC3, PLEKHN1, …	1256	955	14201	1.231286890986094	0.43689826181708624	0.2632339112721479	0.2550078515448933
INTERPRO	IPR005225:Small GTP-binding protein domain	24	1.2618296529968454	0.018384308753227732	RASL12, ARF1, RAB5C, RAB3D, DIRAS1, ERAL1, RHOF, GTPBP4, GTPBP3, RAB32, ARL4C, RASD2, ARFRP1, RAB40B, RAP2B, MRAS, RAB20, RAB15, IFT27, RAC3, RAB6A, RAN, ARL8A, ARF5	1577	176	19129	1.6540900443880786	1	1	1
GOTERM_MF_DIRECT	GO:0042010~interleukin-15 receptor activity	3	0.15772870662460567	0.018632475467957474	IL15RA, IL2RB, IL2RG	1539	3	18976	12.330084470435347	0.9999999999983354	1	0.9993060374739764
GOTERM_MF_DIRECT	GO:0008242~omega peptidase activity	3	0.15772870662460567	0.018632475467957474	UCHL1, GGH, APEH	1539	3	18976	12.330084470435347	0.9999999999983354	1	0.9993060374739764
INTERPRO	IPR018499:Tetraspanin/Peripherin	8	0.4206098843322818	0.018989865654339362	CD151, CD82, TSPAN17, TSPAN7, TSPAN4, CD9, CD37, TSPAN31	1577	34	19129	2.854116155022567	1	1	1
UP_SEQ_FEATURE	ZN_FING:C2H2-type 10	42	2.2082018927444795	0.0190208	ZNF671, ZNF154, ZNF493, ZNF273, ZNF491, ZNF43, ZFP14, MECOM, ZKSCAN7, ZNF84, ZNF548, ZNF768, ZSCAN12, ZNF404, ZNF568, ZNF225, ZNF665, ZNF585B, ZNF445, ZNF169, ZNF345, ZNF586, ZNF443, ZNF585A, ZNF100, ZNF660, ZNF341, ZNF483, ZNF141, ZFP3, ZNF33A, ZNF419, ZFP62, ZNF814, ZNF418, ZNF439, ZFP64, ZNF337, ZNF436, ZNF431, ZNF233, ZNF211	1627	372	20583	1.4283264270277773	1	1	1
REACTOME_PATHWAY	R-HSA-9020558~Interleukin-2 signaling	5	0.26288117770767616	0.019137711476843716	STAT5A, SYK, LCK, IL2RB, IL2RG	1011	12	11009	4.5371744147708535	0.9999999999999971	0.29482352050680716	0.28682772970252557
GOTERM_BP_DIRECT	GO:0000281~mitotic cytokinesis	12	0.6309148264984227	0.019138546950134713	USP8, RTKN, SON, RACGAP1, CFL1, PLK1, CDCA8, BIRC5, KIF20A, STAMBP, BBS4, ZNF365	1566	68	19462	2.193148523777327	1	1	0.9985723026718336
REACTOME_PATHWAY	R-HSA-5610783~Degradation of GLI2 by the proteasome	12	0.6309148264984227	0.0192239	PSMD9, PSMA3, PSMB4, PSMC3, PSMD4, PSMA2, PSMC4, PSMB3, PSMC1, PSME1, PSMF1, RBX1	1011	60	11009	2.17784	0.9999999999999976	0.29482352050680716	0.28682772970252557
REACTOME_PATHWAY	R-HSA-5610785~GLI3 is processed to GLI3R by the proteasome	12	0.6309148264984227	0.0192239	PSMD9, PSMA3, PSMB4, PSMC3, PSMD4, PSMA2, PSMC4, PSMB3, PSMC1, PSME1, PSMF1, RBX1	1011	60	11009	2.17784	0.9999999999999976	0.29482352050680716	0.28682772970252557
REACTOME_PATHWAY	R-HSA-5610780~Degradation of GLI1 by the proteasome	12	0.6309148264984227	0.0192239	PSMD9, PSMA3, PSMB4, PSMC3, PSMD4, PSMA2, PSMC4, PSMB3, PSMC1, PSME1, PSMF1, RBX1	1011	60	11009	2.17784	0.9999999999999976	0.29482352050680716	0.28682772970252557
INTERPRO	IPR008424:Immunoglobulin C2-set	3	0.15772870662460567	0.019234978803138264	CD2, CD4, VCAM1	1577	3	19129	12.12999365884591	1	1	1
INTERPRO	IPR018202:Peptidase S10, serine carboxypeptidase, active site	3	0.15772870662460567	0.019234978803138264	CTSA, SCPEP1, CPVL	1577	3	19129	12.12999365884591	1	1	1
INTERPRO	IPR004687:Lysosomal-associated transmembrane protein 4/5	3	0.15772870662460567	0.019234978803138264	LAPTM4B, LAPTM4A, LAPTM5	1577	3	19129	12.12999365884591	1	1	1
INTERPRO	IPR001563:Peptidase S10, serine carboxypeptidase	3	0.15772870662460567	0.019234978803138264	CTSA, SCPEP1, CPVL	1577	3	19129	12.12999365884591	1	1	1
REACTOME_PATHWAY	R-HSA-69615~G1/S DNA Damage Checkpoints	13	0.6834910620399579	0.019769800579810596	PSMD9, PSMA3, PSMB4, PSMC3, CCNE2, PSMD4, CCNE1, PSMC4, PSMA2, PSMB3, PSMC1, PSME1, PSMF1	1011	68	11009	2.0817623785419213	0.9999999999999991	0.29850817089433934	0.29041245016033246
REACTOME_PATHWAY	R-HSA-8950505~Gene and protein expression by JAK-STAT signaling after Interleukin-12 stimulation	9	0.47318611987381703	0.019889866423177173	CNN2, ARF1, CFL1, PDCD4, STAT4, MIF, PPIA, BOLA2B, SOD1	1011	38	11009	2.579025456817117	0.9999999999999992	0.29850817089433934	0.29041245016033246
PIR_SUPERFAMILY	PIRSF002419:tetraspanin	8	0.4206098843322818	0.0199065	CD151, CD82, TSPAN17, TSPAN7, TSPAN4, CD9, CD37, TSPAN31	184	28	1776	2.75776	0.9538758359092228	1	1
REACTOME_PATHWAY	R-HSA-76005~Response to elevated platelet cytosolic Ca2+	21	1.1041009463722398	0.019980927769038294	SRGN, LGALS3BP, FGA, SPARC, PRKCB, RARRES2, FN1, PLG, THBS1, SOD1, CYB5R1, F8, ISLR, CFL1, CD9, SERPING1, PHACTR2, TAGLN2, ALDOA, GAS6, PPIA	1011	134	11009	1.706519332122769	0.9999999999999993	0.29850817089433934	0.29041245016033246
UP_SEQ_FEATURE	DOMAIN:Peptidase M10 metallopeptidase	4	0.2103049421661409	0.020372417783155326	MMP11, MMP15, MMP1, MMP2	1627	8	20583	6.325445605408727	1	1	1
GOTERM_CC_DIRECT	GO:0000795~synaptonemal complex	7	0.36803364879074657	0.020546005996946434	UBE2I, RAD21L1, PLK1, TEX11, REC8, SYN1, MLH3	1642	28	20660	3.1455542021924483	0.9999999940097372	0.5353702134061471	0.5289128972356782
REACTOME_PATHWAY	R-HSA-169911~Regulation of Apoptosis	11	0.5783385909568874	0.0207047	PSMD9, PSMA3, PSMB4, PSMC3, PSMD4, PSMA2, PSMC4, PSMB3, PSMC1, PSME1, PSMF1	1011	53	11009	2.260026500942463	0.9999999999999998	0.3066778310129396	0.2983605441937774
KEGG_PATHWAY	hsa05162:Measles	21	1.1041009463722398	0.0209969	STAT5A, CSNK2A1, MX2, MX1, FASLG, IL2RG, CD3E, CDK6, CCND2, CCNE2, CCNE1, OAS2, CDK4, OAS3, IL2RB, IRF7, BAK1, IKBKG, FCGR2B, IKBKE, MYD88	770	138	8586	1.6968379446640316	0.9992487339112219	0.2847184080687683	0.2721202484197078
GOTERM_BP_DIRECT	GO:0007059~chromosome segregation	15	0.7886435331230284	0.021104004597216373	CENPT, CDT1, UBE2I, RGS14, RAD21L1, TTK, SKA2, DSN1, CENPH, BIRC5, SLC25A5, BUB1, SPC24, ARL8A, DLGAP5	1566	96	19462	1.9418502554278416	1	1	0.9985723026718336
GOTERM_BP_DIRECT	GO:0030168~platelet activation	12	0.6309148264984227	0.0211684	GNA13, FGA, COL3A1, CD40, RAP2B, ENTPD2, SYK, LCK, F2R, CD9, ADRA2C, PPIA	1566	69	19462	2.161363762563163	1	1	0.9985723026718336
GOTERM_BP_DIRECT	GO:0000082~G1/S transition of mitotic cell cycle	12	0.6309148264984227	0.0211684	GPR132, CDK6, CCND2, DBF4, CCNE2, CCNE1, CDK4, EIF4EBP1, SPDYA, E2F1, IQGAP3, CDKN3	1566	69	19462	2.161363762563163	1	1	0.9985723026718336
GOTERM_BP_DIRECT	GO:0071219~cellular response to molecule of bacterial origin	4	0.2103049421661409	0.021368040872344066	WNT5A, CD14, FCGR2B, SIRT2	1566	8	19462	6.213920817369093	1	1	0.9985723026718336
GOTERM_BP_DIRECT	GO:0010642~negative regulation of platelet-derived growth factor receptor signaling pathway	4	0.2103049421661409	0.021368040872344066	PTGIR, HGS, APOD, SNCA	1566	8	19462	6.213920817369093	1	1	0.9985723026718336
GOTERM_BP_DIRECT	GO:0071260~cellular response to mechanical stimulus	13	0.6834910620399579	0.021427145615028023	CD40, PDE2A, SLC2A1, ATP1A2, FGF2, CNN2, COL1A1, GCLC, TNFRSF8, PIEZO1, BAK1, MYD88, PLEC	1566	78	19462	2.071306939123031	1	1	0.9985723026718336
REACTOME_PATHWAY	R-HSA-5678895~Defective CFTR causes cystic fibrosis	12	0.6309148264984227	0.021575602201071624	PSMD9, PSMA3, PSMB4, PSMC3, PSMD4, PSMA2, PSMC4, PSMB3, PSMC1, DERL1, PSME1, PSMF1	1011	61	11009	2.142141363039354	1	0.31686880181743327	0.30827512975429455
GOTERM_BP_DIRECT	GO:0045954~positive regulation of natural killer cell mediated cytotoxicity	7	0.36803364879074657	0.021699454714142613	STAT5A, LAG3, IL18RAP, CRTAM, KLRD1, SLAMF6, KLRC1	1566	28	19462	3.1069604086845466	1	1	0.9985723026718336
GOTERM_CC_DIRECT	GO:0005794~Golgi apparatus	111	5.83596	0.0217592	GORAB, STMN3, SLA2, LAPTM4A, FGF7, UBASH3A, PTGFRN, B2M, TRIM22, ST6GAL1, USP6, RSAD2, GLCE, SLC35C1, F2R, HLA-C, LAX1, MID1, SCAMP2, WDR77, SMO, AKAP9, WDFY1, KIF20A, PDE9A, RNF122, PMEL, PKDCC, SLC35D1, PKMYT1, APH1A, FUT6, STIP1, COMMD9, PRRC1, ST8SIA6, APOE, CD14, RAB6A, AP1M1, VCAM1, ST8SIA1, GPR108, ST8SIA2, PDE2A, TMEM132A, FZD8, B3GALT6, SLC16A13, BST2, COL1A1, TMEM115, GKAP1, IFT27, NMT2…	1642	1147	20660	1.2176338847196575	1	0.5512328279335166	0.544584
REACTOME_PATHWAY	R-HSA-8948751~Regulation of PTEN stability and activity	13	0.6834910620399579	0.022004077959535157	USP13, CSNK2A1, PSMD9, PSMA3, PSMB4, PSMC3, PSMD4, PSMC4, PSMA2, PSMB3, PSMC1, PSME1, PSMF1	1011	69	11009	2.05159	1	0.32044594204936494	0.31175525579643926
GOTERM_MF_DIRECT	GO:0043394~proteoglycan binding	5	0.26288117770767616	0.0222562	COMP, FCN2, FN1, THBS1, CTSB	1539	14	18976	4.4036015965840525	1	1	0.9993060374739764
GOTERM_BP_DIRECT	GO:0006979~response to oxidative stress	18	0.9463722397476341	0.0224831	NQO1, GPX1, SRXN1, RGS14, NDUFA12, PRDX6, PTGS1, PDLIM1, PRDX5, MMP14, GCLC, PRDX4, PRDX1, HMOX1, TRIM25, C19ORF12, APOE, MICB	1566	125	19462	1.7896091954022988	1	1	0.9985723026718336
GOTERM_BP_DIRECT	GO:0045454~cell redox homeostasis	9	0.47318611987381703	0.0225101	NQO1, PRDX5, GCLC, PRDX4, GPX1, HVCN1, PRDX1, PRDX6, BOLA2B	1566	44	19462	2.542058516196447	1	1	0.9985723026718336
GOTERM_MF_DIRECT	GO:0015026~coreceptor activity	10	0.5257623554153523	0.022687913944020692	CD4, IL18RAP, IGSF1, IL2RB, CCR8, CXCR4, CCR5, IL2RG, IL17RC, RGMA	1539	52	18976	2.3711700904683357	0.9999999999999958	1	0.9993060374739764
GOTERM_BP_DIRECT	GO:0007049~cell cycle	42	2.2082018927444795	0.0227192	CDC123, UHRF1, PRCC, VPS4A, CDCA8, CLTA, IKZF1, ING4, PPP1CB, RPS6KA3, CHAF1B, CDC45, E2F2, MAP3K8, TRIM21, PELO, STOX1, CENPT, RBM38, CDT1, CDKN2C, CSNK2A1, RCC2, PLK1, LIG4, APEX2, BLCAP, MLF1, DCDC1, KRT18, DMTF1, MCM3, TXNIP, MPLKIP, BIRC5, MAPRE3, FAM32A, MCM6, SPC24, ARL8A, CDKN3, MCM2	1566	370	19462	1.4107279693486592	1	1	0.9985723026718336
REACTOME_PATHWAY	R-HSA-210991~Basigin interactions	7	0.36803364879074657	0.022775501113634397	SPN, SLC7A5, MMP1, SLC3A2, ATP1B2, SLC16A3, PPIA	1011	25	11009	3.048981206726014	1	0.3289161952494034	0.3199957906465633
GOTERM_BP_DIRECT	GO:0071397~cellular response to cholesterol	6	0.31545741324921134	0.0229142	GRAMD1B, SMO, INHBB, INHBA, GPR155, LRP8	1566	21	19462	3.550811895639482	1	1	0.9985723026718336
SMART	SM00213:UBQ	9	0.47318611987381703	0.023483457953711793	UBL4A, UHRF1, SUMO3, UBTD1, NEDD8, ISG15, FAU, UBQLN4, OASL	842	44	10366	2.518192614985964	0.9998744286602914	1	1
REACTOME_PATHWAY	R-HSA-917729~Endosomal Sorting Complex Required For Transport (ESCRT)	8	0.4206098843322818	0.023489613263154758	HGS, VPS4A, CHMP3, CHMP4A, VPS37B, VPS25, VPS28, CHMP5	1011	32	11009	2.722304648862512	1	0.3364256180582413	0.32730155340230516
UP_SEQ_FEATURE	ZN_FING:C2H2-type 7	52	2.7339642481598316	0.024138528520974055	ZNF491, ZNF43, SALL2, ZNF84, ZNF768, ZNF404, ZNF568, ZNF445, ZNF169, ZNF443, ZNF587B, ZNF19, ZNF483, ZFP3, ZSCAN22, ZNF439, ZNF436, ZNF552, ZNF431, ZNF233, ZNF397, ZNF671, ZNF154, ZNF273, ZFP14, ZKSCAN7, ZNF429, ZNF548, ZSCAN12, ZNF665, ZNF225, ZNF585B, ZNF620, ZNF785, ZNF345, ZNF586, ZNF223, ZNF100, ZNF584, ZNF660, ZNF341, ZNF141, ZNF33A, ZNF419, ZFP62, ZNF814, ZNF418, ZFP64, ZNF337, ZNF776, ZNF…	1627	488	20583	1.3480457847592373	1	1	1
INTERPRO	IPR001190:Speract/scavenger receptor	7	0.36803364879074657	0.024157192027405478	PGBD1, LGALS3BP, CD6, TMPRSS3, TMPRSS4, TMPRSS2, PRSS12	1577	28	19129	3.032498414711477	1	1	1
GOTERM_CC_DIRECT	GO:0032585~multivesicular body membrane	7	0.36803364879074657	0.0242141	LAPTM4B, PMEL, HGS, CHMP3, CHMP4A, TMEM9, CHMP5	1642	29	20660	3.03709	0.9999999998044109	0.5897758006775273	0.5826622767658466
KEGG_PATHWAY	hsa05168:Herpes simplex virus 1 infection	60	3.1545741324921135	0.0244298	ZNF43, FASLG, PPP1CB, ZNF84, ZNF768, ZNF404, ZNF568, IKBKG, IKBKE, B2M, ZNF169, ZNF443, ZNF19, SYK, HLA-C, TRAF2, OAS2, OAS3, ZNF439, IRF7, ZNF436, ZNF552, ZNF431, ZNF233, ZNF671, ZNF154, ZNF273, ZFP14, ZNF429, EIF4EBP1, ZNF548, CCL2, BAK1, ZNF665, ZNF225, ZNF585B, ZNF620, ZNF785, ZNF586, ZNF223, ZNF585A, ZNF100, ZNF584, CD74, HLA-DRB5, ZNF141, ALYREF, PILRB, PML, ZNF33A, BST2, ZNF419, ZNF814, ZN…	770	512	8586	1.3067167207792207	0.9997716272971511	0.3185266662507147	0.3044325659741344
UP_SEQ_FEATURE	ZN_FING:C2H2-type 12	33	1.7350157728706623	0.024482159800430524	ZNF154, ZNF493, ZNF273, ZNF491, ZNF43, ZFP14, ZKSCAN7, ZNF429, ZNF84, ZSCAN12, ZNF404, ZNF568, ZNF225, ZNF665, ZNF585B, ZNF445, ZNF169, ZNF345, ZNF443, ZNF585A, ZNF100, ZNF341, ZFP3, ZNF33A, ZFP62, ZNF814, ZNF418, ZFP64, ZNF337, ZNF436, ZNF431, ZNF233, ZNF211	1627	282	20583	1.4804234395637446	1	1	1
GOTERM_CC_DIRECT	GO:0005887~integral component of plasma membrane	137	7.202944269190326	0.024573991694896973	NPFFR2, CD84, CD83, TFRC, CD82, SLC23A1, ICAM2, AQP7, RRH, ICAM5, ICAM1, SLC8A2, IL27RA, GPR176, VSIG2, GJA5, SLC16A3, CDON, KCNH2, SEMA6C, SLC34A2, CHRNB1, CD96, SEMA6A, F2R, HLA-C, SLC6A12, CACNB2, GPRIN1, SCNN1B, ADAM8, CHRNA1, SLC22A4, GRIA2, PMEL, SEMA7A, CD151, SDC4, HVCN1, GPR88, CLCNKA, SLC5A1, MST1R, THY1, CACNA1H, APH1A, CD79B, TSPAN7, TSPAN4, KLRC1, RHBDL1, SLC14A1, OPN3, VCAM1, SLC52A…	1642	1455	20660	1.184717321513032	0.9999999998602892	0.5897758006775273	0.5826622767658466
UP_KW_CELLULAR_COMPONENT	KW-0084~Basement membrane	9	0.47318611987381703	0.0247794	COL28A1, LAD1, SPARC, LAMA3, COL4A5, VWA1, COL8A1, FREM1, MLF2	1461	44	17831	2.496406570841889	0.778093	0.1934149292602238	0.1772970184885385
REACTOME_PATHWAY	R-HSA-9020591~Interleukin-12 signaling	10	0.5257623554153523	0.025124708816272556	CNN2, ARF1, CFL1, PDCD4, STAT4, MIF, P4HB, PPIA, BOLA2B, SOD1	1011	47	11009	2.316855020308521	1	0.3436099669910874	0.334291
REACTOME_PATHWAY	R-HSA-174414~Processive synthesis on the C-strand of the telomere	6	0.31545741324921134	0.025181564301043704	POLD3, POLD4, ACD, FEN1, PCNA, POLD1	1011	19	11009	3.4387006090894894	1	0.3436099669910874	0.334291
REACTOME_PATHWAY	R-HSA-9818027~NFE2L2 regulating anti-oxidant/detoxification enzymes	6	0.31545741324921134	0.025181564301043704	NQO1, GCLC, SRXN1, PRDX1, HMOX1, MAFK	1011	19	11009	3.4387006090894894	1	0.3436099669910874	0.334291
REACTOME_PATHWAY	R-HSA-5083632~Defective C1GALT1C1 causes TNPS	6	0.31545741324921134	0.025181564301043704	MUC16, C1GALT1, MUC19, MUC12, MUC5B, MUC5AC	1011	19	11009	3.4387006090894894	1	0.3436099669910874	0.334291
GOTERM_MF_DIRECT	GO:0042803~protein homodimerization activity	77	4.048370136698212	0.0254866	HIP1, TENM4, MSTN, TFRC, CPQ, FLT4, CIB2, ENO1, DNPH1, PYCARD, TRIM9, MECOM, IMPA2, KYNU, IKBKG, B2M, TRIM21, IL6R, PDK2, TRIM22, ZNF365, KCNH2, STARD3, ST6GAL1, G6PD, SDS, GLCE, ACSL6, DNTTIP1, MTUS2, ADRA2C, MID1, DCK, GREM1, ALDH1A3, BIRC5, PADI2, CHMP4A, SNRPC, PAFAH1B3, VPS25, PRTFDC1, PRPS2, ZNF397, SHMT2, HM13, SLC3A2, CST7, THBS1, SRM, IRAK2, HSD17B1, HMOX1, PSMF1, BAK1, APOE, SRGAP2, CAM…	1539	749	18976	1.2675787773344749	0.9999999999999999	1	0.9993060374739764
GOTERM_BP_DIRECT	GO:0042267~natural killer cell mediated cytotoxicity	7	0.36803364879074657	0.0255526	CD2, FCGR3A, LAG3, PRDX1, CEBPG, NKG7, SLAMF7	1566	29	19462	2.999823842867838	1	1	0.9985723026718336
UP_SEQ_FEATURE	DOMAIN:Ig-like V-type	19	0.9989484752891693	0.025731551165407263	CD84, LAG3, CD83, CRTAM, PILRB, TAPBPL, THY1, SIRPB1, HAPLN1, CD79B, CD2, CD4, VSIG2, CTLA4, SLAMF7, SLAMF6, TIGIT, ICOS, MPZL1	1627	139	20583	1.7292585108311629	1	1	1
UP_KW_CELLULAR_COMPONENT	KW-0999~Mitochondrion inner membrane	40	2.1030494216614093	0.0257887	STOML2, NDUFB7, NDUFB10, SHMT2, NDUFA12, COX4I1, NDUFB3, TIMM13, UQCR10, COX5B, COX6A1, COX5A, UQCRH, IMMP2L, TMEM65, MTG1, CYP11A1, CHCHD6, TIMM17A, TIMM17B, ROMO1, SLC25A43, NDUFA7, RSAD2, NDUFA5, PET100, PDE2A, NDUFA1, ERAL1, HIGD2A, COX6B1, SLC25A16, CYP27A1, NDUFAF6, UQCRQ, NDUFS5, TMEM126A, SPNS1, SLC25A12, SLC25A5	1461	346	17831	1.4109426989986271	0.7914592620798677	0.1934149292602238	0.1772970184885385
UP_SEQ_FEATURE	REPEAT:Hemopexin 4	6	0.31545741324921134	0.0259165	MMP11, MMP14, MMP24, MMP15, MMP1, MMP2	1627	22	20583	3.45024	1	1	1
UP_SEQ_FEATURE	REPEAT:Hemopexin 3	6	0.31545741324921134	0.0259165	MMP11, MMP14, MMP24, MMP15, MMP1, MMP2	1627	22	20583	3.45024	1	1	1
REACTOME_PATHWAY	R-HSA-114608~Platelet degranulation	20	1.0515247108307046	0.025984975227705025	SRGN, LGALS3BP, FGA, SPARC, RARRES2, FN1, PLG, THBS1, SOD1, CYB5R1, F8, ISLR, CFL1, CD9, SERPING1, PHACTR2, TAGLN2, ALDOA, GAS6, PPIA	1011	129	11009	1.6882509450310152	1	0.3436099669910874	0.334291
GOTERM_BP_DIRECT	GO:0032743~positive regulation of interleukin-2 production	8	0.4206098843322818	0.026101626956775686	STAT5A, CD4, STOML2, CD83, IRF4, TRAF2, PRKCQ, CD3E	1566	37	19462	2.687100893997446	1	1	0.9985723026718336
UP_SEQ_FEATURE	CARBOHYD:O-linked (Xyl...) (glycosaminoglycan) serine	5	0.26288117770767616	0.026157499816671887	SRGN, SDC4, SPOCK2, SDC2, GPC4	1627	15	20583	4.216963736939151	1	1	1
UP_SEQ_FEATURE	DOMAIN:Immunoglobulin C1-set	5	0.26288117770767616	0.026157499816671887	HLA-DRB5, HLA-C, TRDC, B2M, HLA-DRB1	1627	15	20583	4.216963736939151	1	1	1
REACTOME_PATHWAY	R-HSA-983705~Signaling by the B Cell Receptor (BCR)	18	0.9463722397476341	0.026183878731435253	SYK, PRKCB, DAPP1, CD79B, PSMD9, PSMA3, PSMB4, PSMC3, PSMD4, PSMC4, PSMA2, PSMB3, PSMC1, PSME1, IKBKG, PSMF1, NFKBIE, PPIA	1011	112	11009	1.7500529885544724	1	0.3436099669910874	0.334291
REACTOME_PATHWAY	R-HSA-69618~Mitotic Spindle Checkpoint	18	0.9463722397476341	0.026183878731435253	CENPT, UBE2C, RCC2, PLK1, CDCA8, PPP2R5D, ZWINT, ANAPC11, SKA2, PPP2CA, CDC20, DSN1, CENPH, UBE2S, BIRC5, KIF2C, BUB1, SPC24	1011	112	11009	1.7500529885544724	1	0.3436099669910874	0.334291
REACTOME_PATHWAY	R-HSA-9824272~Somitogenesis	11	0.5783385909568874	0.026324343965020567	PSMD9, PSMA3, PSMB4, PSMC3, PSMD4, PSMA2, PSMC4, PSMB3, PSMC1, PSME1, PSMF1	1011	55	11009	2.17784	1	0.3436099669910874	0.334291
REACTOME_PATHWAY	R-HSA-4641257~Degradation of AXIN	11	0.5783385909568874	0.026324343965020567	PSMD9, PSMA3, PSMB4, PSMC3, PSMD4, PSMA2, PSMC4, PSMB3, PSMC1, PSME1, PSMF1	1011	55	11009	2.17784	1	0.3436099669910874	0.334291
REACTOME_PATHWAY	R-HSA-5389840~Mitochondrial translation elongation	15	0.7886435331230284	0.026370528338034986	MRPS28, MRPS35, MRPS14, MRPL16, MRPL17, MRPS21, MRPL36, ERAL1, MRPL48, MRPL13, MRPL24, MRPL22, MRPL44, MRPL51, MRPL9	1011	87	11009	1.8774514819741466	1	0.3436099669910874	0.334291
REACTOME_PATHWAY	R-HSA-5419276~Mitochondrial translation termination	15	0.7886435331230284	0.026370528338034986	MRPS28, MRPS35, MRPS14, MRPL16, MRPL17, MRPS21, MRPL36, ERAL1, MRPL48, MRPL13, MRPL24, MRPL22, MRPL44, MRPL51, MRPL9	1011	87	11009	1.8774514819741466	1	0.3436099669910874	0.334291
REACTOME_PATHWAY	R-HSA-5368286~Mitochondrial translation initiation	15	0.7886435331230284	0.026370528338034986	MRPS28, MRPS35, MRPS14, MRPL16, MRPL17, MRPS21, MRPL36, ERAL1, MRPL48, MRPL13, MRPL24, MRPL22, MRPL44, MRPL51, MRPL9	1011	87	11009	1.8774514819741466	1	0.3436099669910874	0.334291
GOTERM_MF_DIRECT	GO:0008137~NADH dehydrogenase (ubiquinone) activity	9	0.47318611987381703	0.0265924	NDUFA9, NDUFA7, NDUFB7, NDUFA5, NDUFB10, NDUFA12, NDUFS5, NDUFB3, NDUFA1	1539	45	18976	2.4660168940870695	1	1	0.9993060374739764
GOTERM_CC_DIRECT	GO:0035579~specific granule membrane	14	0.7360672975814931	0.0273592	SLC44A2, HVCN1, KCNAB2, ITGAL, CKAP4, PTPRB, RAP2B, PLAU, DNAJC5, SLCO4C1, TMBIM1, ADAM8, DEGS1, AP1M1	1642	91	20660	1.9357256628876605	0.9999999999897041	0.6397845256251942	0.6320678263029605
REACTOME_PATHWAY	R-HSA-174411~Polymerase switching on the C-strand of the telomere	7	0.36803364879074657	0.027378768075188343	POLD3, POLD4, POLA2, ACD, RFC4, PCNA, POLD1	1011	26	11009	2.931712698775013	1	0.35339290842356486	0.3438086806705888
REACTOME_PATHWAY	R-HSA-1592389~Activation of Matrix Metalloproteinases	8	0.4206098843322818	0.027529164822378105	MMP11, MMP14, MMP24, MMP15, MMP1, MMP2, TIMP2, PLG	1011	33	11009	2.6398105685939512	1	0.35339290842356486	0.3438086806705888
GOTERM_BP_DIRECT	GO:1903543~positive regulation of exosomal secretion	5	0.26288117770767616	0.027723162731069943	SMPD3, SDC4, HGS, VPS4A, SDC1	1566	15	19462	4.142613878246062	1	1	0.9985723026718336
GOTERM_BP_DIRECT	GO:0045579~positive regulation of B cell differentiation	5	0.26288117770767616	0.027723162731069943	STAT5A, MMP14, SYK, CD27, IL2RG	1566	15	19462	4.142613878246062	1	1	0.9985723026718336
GOTERM_BP_DIRECT	GO:0043968~histone H2A acetylation	6	0.31545741324921134	0.027743182261418507	NAA40, MRGBP, VPS72, YEATS4, DMAP1, ACTB	1566	22	19462	3.389411354928596	1	1	0.9985723026718336
GOTERM_BP_DIRECT	GO:0039702~viral budding via host ESCRT complex	6	0.31545741324921134	0.027743182261418507	VPS4A, CHMP3, CHMP4A, VPS37B, VPS28, CHMP5	1566	22	19462	3.389411354928596	1	1	0.9985723026718336
GOTERM_BP_DIRECT	GO:0045807~positive regulation of endocytosis	6	0.31545741324921134	0.027743182261418507	CLIP3, CD151, WNT5A, CD14, APOE, SNCA	1566	22	19462	3.389411354928596	1	1	0.9985723026718336
UP_KW_MOLECULAR_FUNCTION	KW-0904~Protein phosphatase	19	0.9989484752891693	0.027947320413358123	DUSP4, CDKL3, PTPRR, PPTC7, EYA1, PPM1M, PTPRM, PPM1J, TPTE, DUSP8, RPAP2, DUSP7, PPP2CA, PPP1CB, DUSP23, PTPRB, UBASH3B, PTPN7, CDKN3	909	145	11871	1.7112325025606008	0.9428955463138454	0.7700441274289432	0.7700441274289432
GOTERM_BP_DIRECT	GO:0043627~response to estrogen	11	0.5783385909568874	0.027978242754182488	SLC34A2, F7, MMP14, KRT19, MSTN, SRD5A1, MMP2, CITED4, HMOX1, TRIM25, HOXA11	1566	63	19462	2.1699406028907946	1	1	0.9985723026718336
KEGG_PATHWAY	hsa04672:Intestinal immune network for IgA production	10	0.5257623554153523	0.027999695723688742	IL15RA, PIGR, HLA-DRB5, CD40, CXCR4, ITGB7, TNFRSF13C, ICOS, HLA-DRB1, TNFSF13B	770	49	8586	2.2756427246223163	0.9999340962848063	0.35155173519742533	0.3359963486842649
REACTOME_PATHWAY	R-HSA-68886~M Phase	51	2.6813880126182967	0.028077124165962267	CDC20, PSMD9, PTTG1, PSMD4, TUBB1, LBR, YWHAG, CSNK2A1, PRKCB, HAUS3, PPP2R5D, HAUS5, TUBG1, SIRT2, PSMA3, PSMA2, AKAP9, PSME1, CHMP3, BIRC5, CHMP4A, KIF2C, KIF20A, VPS4A, CDCA8, NCAPH, ANAPC11, SKA2, PPP2CA, CCNB2, PSMB4, DSN1, HAUS8, PSMB3, PSMF1, BUB1, CENPT, UBE2I, UBE2C, CEP152, RCC2, PLK1, ZWINT, CENPH, PSMC3, PSMC4, UBE2S, PSMC1, LPIN1, SPC24, RAN	1011	416	11009	1.3349763181921936	1	0.3577768836736221	0.3480737598809734
BIOCARTA	h_blymphocytePathway:B Lymphocyte Cell Surface Molecules	5	0.26288117770767616	0.028306136166321737	CD40, ITGAL, FCGR2B, HLA-DRB1, ICAM1	186	11	1623	3.966275659824047	0.9984363896154913	1	1
GOTERM_BP_DIRECT	GO:0030890~positive regulation of B cell proliferation	9	0.47318611987381703	0.028778	CD74, CD40, TFRC, CD38, IRS2, TNFRSF13C, MIF, BMI1, TNFSF13B	1566	46	19462	2.4315342328835583	1	1	0.9985723026718336
GOTERM_BP_DIRECT	GO:0006120~mitochondrial electron transport, NADH to ubiquinone	9	0.47318611987381703	0.028778	NDUFA9, NDUFA7, NDUFB7, NDUFA5, NDUFB10, NDUFS5, NDUFAB1, NDUFB3, NDUFA1	1566	46	19462	2.4315342328835583	1	1	0.9985723026718336
GOTERM_CC_DIRECT	GO:0008540~proteasome regulatory particle, base subcomplex	4	0.2103049421661409	0.029205630759165515	PSMC3, PSMD4, PSMC4, PSMC1	1642	9	20660	5.592096359453241	0.9999999999981801	0.6658883813089738	0.6578568328502031
REACTOME_PATHWAY	R-HSA-5362768~Hh mutants are degraded by ERAD	11	0.5783385909568874	0.029509303337485082	PSMD9, PSMA3, PSMB4, PSMC3, PSMD4, PSMA2, PSMC4, PSMB3, PSMC1, PSME1, PSMF1	1011	56	11009	2.138953652677688	1	0.37057697597001193	0.36052670599275255
REACTOME_PATHWAY	R-HSA-450408~AUF1 (hnRNP D0) binds and destabilizes mRNA	11	0.5783385909568874	0.029509303337485082	PSMD9, PSMA3, PSMB4, PSMC3, PSMD4, PSMA2, PSMC4, PSMB3, PSMC1, PSME1, PSMF1	1011	56	11009	2.138953652677688	1	0.37057697597001193	0.36052670599275255
GOTERM_BP_DIRECT	GO:0001935~endothelial cell proliferation	7	0.36803364879074657	0.029834961452194754	MMP14, FGF7, HMOX1, COL8A1, PRKX, LIPA, FGF2	1566	30	19462	2.8998297147722436	1	1	0.9985723026718336
REACTOME_PATHWAY	R-HSA-1442490~Collagen degradation	12	0.6309148264984227	0.029892957752234144	COL1A1, MMP11, COL3A1, MMP14, COL1A2, MMP15, MMP1, MMP2, COL23A1, COL4A5, COL8A1, CTSB	1011	64	11009	2.041728486646884	1	0.3726942142778545	0.362587
INTERPRO	IPR021158:Peptidase M10A, cysteine switch, zinc binding site	5	0.26288117770767616	0.030006	MMP11, MMP14, MMP15, MMP1, MMP2	1577	15	19129	4.043331219615304	1	1	1
GOTERM_BP_DIRECT	GO:0032825~positive regulation of natural killer cell differentiation	4	0.2103049421661409	0.030164375436884754	STAT5A, IL15RA, TOX, GAS6	1566	9	19462	5.52349	1	1	0.9985723026718336
UP_KW_PTM	KW-1015~Disulfide bond	371	19.50578338590957	0.030193861924516615	NPFFR2, SPON1, SPARC, TFRC, IGHV3-23, ICAM2, RRH, ICAM5, IGLV8-61, ICAM1, IGLV2-8, IL4I1, ISLR, IGKV1-16, VSIG2, IGKV1-17, IGKV1-12, PIEZO1, PTGFRN, IGHV3-7, B2M, SCN1A, CDON, IL15RA, SLC34A2, ST6GAL1, IGHV3-30, ENTPD2, ENTPD5, HLA-C, SLC6A12, RNASE1, SIGIRR, IGKV2D-29, IGKV1-27, SOAT1, ERVW-1, IGKV4-1, MXRA8, OR4C12, SERPING1, TXNIP, FREM1, CD101, PLA1A, IGSF1, TAPBPL, SLC5A1, MST1R, THY1, CD79B…	1256	3860	14201	1.0867155786937726	0.613426	0.2632339112721479	0.2550078515448933
UP_SEQ_FEATURE	TRANSMEM:Helical; Signal-anchor for type II membrane protein	44	2.3133543638275498	0.030219274998564173	TFRC, TMPRSS3, TMPRSS4, OGFOD3, TMPRSS2, FASLG, SLC3A2, ECE2, TNFSF13B, FUT6, CYP4Z1, DPP6, CHST11, APMAP, CD38, ST8SIA6, KLRC1, GAL3ST2, B4GALNT4, HS3ST3B1, CSGALNACT1, CD74, CHST6, ST6GAL1, ST8SIA1, ST8SIA2, GLCE, COL23A1, C1GALT1, B3GALT6, MOGS, ATP1B2, MANEAL, POMGNT2, NAALADL2, BST2, B3GNT7, MGAT4B, B3GNT3, POMK, KLRD1, NPTXR, ST6GALNAC5, ITM2C	1627	406	20583	1.3710325450146996	1	1	1
KEGG_PATHWAY	hsa04350:TGF-beta signaling pathway	17	0.8937960042060988	0.0303898	TFRC, ZFYVE9, IGSF1, BMP8A, INHBB, INHBA, EMP3, LRRC32, BMP7, THBS1, LTBP1, RGMA, RBX1, PPP2CA, GREM1, ID2, ID3	770	108	8586	1.7551948051948052	0.9999713951121476	0.36793382874703545	0.3516535708378746
REACTOME_PATHWAY	R-HSA-1474228~Degradation of the extracellular matrix	21	1.1041009463722398	0.0305314	MMP1, MMP2, COL23A1, LAMA3, FN1, PLG, COL1A1, MMP11, COL3A1, MMP14, CAPN12, MMP24, COL1A2, ADAM15, MMP15, TIMP2, SPP1, COL4A5, COL8A1, ADAM8, CTSB	1011	140	11009	1.6333827893175075	1	0.37793568091276547	0.36768583844138636
GOTERM_MF_DIRECT	GO:0097027~ubiquitin-protein transferase activator activity	4	0.2103049421661409	0.0307942	CBX8, CDC20, AUP1, BMI1	1539	9	18976	5.48004	1	1	0.9993060374739764
UP_SEQ_FEATURE	REPEAT:Hemopexin 2	6	0.31545741324921134	0.031023117050411563	MMP11, MMP14, MMP24, MMP15, MMP1, MMP2	1627	23	20583	3.3002324897784665	1	1	1
UP_SEQ_FEATURE	DOMAIN:CHCH	6	0.31545741324921134	0.031023117050411563	COA4, NDUFB7, NDUFS5, CHCHD6, CHCHD10, COX6B1	1627	23	20583	3.3002324897784665	1	1	1
UP_SEQ_FEATURE	REPEAT:Hemopexin 1	6	0.31545741324921134	0.031023117050411563	MMP11, MMP14, MMP24, MMP15, MMP1, MMP2	1627	23	20583	3.3002324897784665	1	1	1
UP_SEQ_FEATURE	DOMAIN:Ig-like C2-type 6	8	0.4206098843322818	0.031214033562418413	VCAM1, MYBPC2, NPHS1, FLT4, IGSF1, PTGFRN, ICAM5, CD101	1627	39	20583	2.59505	1	1	1
REACTOME_PATHWAY	R-HSA-69002~DNA Replication Pre-Initiation	23	1.2092534174553102	0.0312674	CDT1, UBE2C, GMNN, ANAPC11, PSMD9, POLA2, PSMA3, PSMB4, DBF4, CDC45, ORC1, PSMC3, PSMD4, PSMC4, UBE2S, PSMA2, PSMB3, PSMC1, MCM3, PSME1, MCM6, PSMF1, MCM2	1011	158	11009	1.5851394157933616	1	0.38398424503497186	0.37357
GOTERM_CC_DIRECT	GO:0005762~mitochondrial large ribosomal subunit	10	0.5257623554153523	0.0313461	MRPL51, MRPL16, MRPL17, MRPL36, MRPL48, MRPL9, MRPL13, MRPL24, MRPL22, MRPL44	1642	56	20660	2.2468244301374627	0.9999999999997569	0.6972598885851912	0.6888499557184838
REACTOME_PATHWAY	R-HSA-69481~G2/M Checkpoints	24	1.2618296529968454	0.0314632	RFC4, PKMYT1, YWHAZ, CCNB2, PSMD9, PSMA3, PSMB4, DBF4, CDC45, ORC1, PSMC3, PSMD4, PSMC4, PSMA2, PSMB3, PSMC1, MCM3, PSME1, SFN, MCM6, PSMF1, GTSE1, YWHAG, MCM2	1011	167	11009	1.5649176424598874	1	0.38398424503497186	0.37357
UP_KW_MOLECULAR_FUNCTION	KW-0086~Bence-Jones protein	3	0.15772870662460567	0.0316006	IGLC3, IGLC2, IGKV1-33	909	4	11871	9.794554455445544	0.9609603033488868	0.7700441274289432	0.7700441274289432
REACTOME_PATHWAY	R-HSA-174417~Telomere C-strand (Lagging Strand) Synthesis	8	0.4206098843322818	0.0320152	POLD3, POLD4, POLA2, ACD, FEN1, RFC4, PCNA, POLD1	1011	34	11009	2.5621690812823643	1	0.38798870037676325	0.37746621398454866
GOTERM_MF_DIRECT	GO:0017018~myosin phosphatase activity	13	0.6834910620399579	0.0321462	DUSP4, PPTC7, EYA1, PPM1M, PPM1J, DUSP8, RPAP2, CPPED1, DUSP7, PPP2CA, PPP1CB, DUSP23, CDKN3	1539	82	18976	1.95477	1	1	0.9993060374739764
GOTERM_BP_DIRECT	GO:0006096~glycolytic process	9	0.47318611987381703	0.0323233	PFKFB2, HK3, ALDOC, ENO1, ALDOA, LIPA, GAPDH, GCK, ENO4	1566	47	19462	2.379799461971142	1	1	0.9985723026718336
UP_KW_DISEASE	KW-0242~Dwarfism	27	1.4195583596214512	0.0327328	PCNA, SLC35D1, GORAB, GMNN, TONSL, RNPC3, COMP, PTDSS1, CDC45, ORC1, CHST11, POC1A, LBR, CENPT, CSGALNACT1, STAT5A, CDT1, CEP152, WNT5A, FN1, B3GALT6, COL1A1, PLCB3, COL1A2, TRIP11, ERCC5, PPIB	399	213	4728	1.5020650217092024	0.9675447926868816	1	1
UP_SEQ_FEATURE	DISULFID:Interchain (with heavy chain)	5	0.26288117770767616	0.0327493	IGHM, IGLC7, IGLC6, IGLC3, IGLC2	1627	16	20583	3.9534035033804544	1	1	1
UP_KW_PTM	KW-0357~Heparan sulfate	6	0.31545741324921134	0.0329042	SDC4, SPOCK2, SDC2, SDC1, PRELP, GPC4	1256	21	14201	3.2304367606915374	0.6455509053242087	0.2632339112721479	0.2550078515448933
REACTOME_PATHWAY	R-HSA-447115~Interleukin-12 family signaling	11	0.5783385909568874	0.0329577	CNN2, ARF1, CFL1, PDCD4, STAT4, MIF, P4HB, PPIA, BOLA2B, SOD1, IL27RA	1011	57	11009	2.101428149999132	1	0.3930705567720734	0.3824102473847177
REACTOME_PATHWAY	R-HSA-69541~Stabilization of p53	11	0.5783385909568874	0.0329577	PSMD9, PSMA3, PSMB4, PSMC3, PSMD4, PSMA2, PSMC4, PSMB3, PSMC1, PSME1, PSMF1	1011	57	11009	2.101428149999132	1	0.3930705567720734	0.3824102473847177
REACTOME_PATHWAY	R-HSA-5358346~Hedgehog ligand biogenesis	12	0.6309148264984227	0.033115	PSMD9, PSMA3, PSMB4, PSMC3, PSMD4, PSMA2, PSMC4, PSMB3, PSMC1, PSME1, PSMF1, P4HB	1011	65	11009	2.0103172791600095	1	0.3930705567720734	0.3824102473847177
GOTERM_BP_DIRECT	GO:0043154~negative regulation of cysteine-type endopeptidase activity involved in apoptotic process	10	0.5257623554153523	0.033555	RPS6KA3, GPX1, CSNK2A1, LAMP3, BIRC5, SFN, GAS6, THBS1, NAIP, SNCA	1566	56	19462	2.2192574347746765	1	1	0.9985723026718336
UP_SEQ_FEATURE	DOMAIN:2'-5'-oligoadenylate synthetase 1	3	0.15772870662460567	0.0336014	OAS2, OAS3, OASL	1627	4	20583	9.488168408113092	1	1	1
UP_SEQ_FEATURE	ACT_SITE:Cysteine sulfenic acid (-SOH) intermediate; for peroxidase activity	3	0.15772870662460567	0.0336014	PRDX4, PRDX1, PRDX6	1627	4	20583	9.488168408113092	1	1	1
UP_SEQ_FEATURE	DOMAIN:Ig-like C2-type 5	10	0.5257623554153523	0.0336685	VCAM1, MYBPC2, NPHS1, FLT4, IGSF1, PTGFRN, ICAM5, CD101, ICAM1, CDON	1627	57	20583	2.2194545983890275	1	1	1
GOTERM_BP_DIRECT	GO:0006879~cellular iron ion homeostasis	11	0.5783385909568874	0.0339382	TFRC, MT-RNR2, CCDC115, HMOX1, CYB561A3, B2M, CP, CYB561, BOLA2B, FTL, SOD1	1566	65	19462	2.1031731997249237	1	1	0.9985723026718336
GOTERM_BP_DIRECT	GO:0042776~mitochondrial ATP synthesis coupled proton transport	11	0.5783385909568874	0.0339382	NDUFA9, STOML2, NDUFA7, NDUFB7, NDUFA5, NDUFB10, NDUFA12, NDUFS5, NDUFAB1, NDUFB3, NDUFA1	1566	65	19462	2.1031731997249237	1	1	0.9985723026718336
REACTOME_PATHWAY	R-HSA-1474290~Collagen formation	15	0.7886435331230284	0.0341917	COL28A1, CD151, COL23A1, LAMA3, COL1A1, COL3A1, COL1A2, LOX, SERPINH1, COL4A5, COL8A1, P4HB, PPIB, CTSB, PLEC	1011	90	11009	1.8148697659083417	1	0.4030902034358417	0.3921581552180202
SMART	SM00120:HX	6	0.31545741324921134	0.0342192	MMP11, MMP14, MMP24, MMP15, MMP1, MMP2	842	23	10366	3.2116079727357225	0.9999980764746538	1	1
GOTERM_BP_DIRECT	GO:0072520~seminiferous tubule development	5	0.26288117770767616	0.034670885017037266	AR, TBC1D20, ATRX, INHBB, REC8	1566	16	19462	3.8837005108556832	1	1	0.9985723026718336
GOTERM_BP_DIRECT	GO:2000310~regulation of NMDA receptor activity	5	0.26288117770767616	0.034670885017037266	NLGN1, RELN, RASGRF1, CNIH2, MAPK8IP2	1566	16	19462	3.8837005108556832	1	1	0.9985723026718336
GOTERM_BP_DIRECT	GO:0035710~CD4-positive, alpha-beta T cell activation	3	0.15772870662460567	0.0347474	STOML2, RSAD2, NKG7	1566	4	19462	9.320881226053638	1	1	0.9985723026718336
GOTERM_BP_DIRECT	GO:1990086~lens fiber cell apoptotic process	3	0.15772870662460567	0.0347474	SIX3, E2F1, E2F2	1566	4	19462	9.320881226053638	1	1	0.9985723026718336
GOTERM_BP_DIRECT	GO:0045003~double-strand break repair via synthesis-dependent strand annealing	3	0.15772870662460567	0.0347474	FANCM, XRCC3, RAD54L	1566	4	19462	9.320881226053638	1	1	0.9985723026718336
GOTERM_BP_DIRECT	GO:0009224~CMP biosynthetic process	3	0.15772870662460567	0.0347474	UCK2, DCK, UCKL1	1566	4	19462	9.320881226053638	1	1	0.9985723026718336
GOTERM_BP_DIRECT	GO:0060686~negative regulation of prostatic bud formation	3	0.15772870662460567	0.0347474	WNT5A, SULF1, BMP7	1566	4	19462	9.320881226053638	1	1	0.9985723026718336
GOTERM_MF_DIRECT	GO:0001730~2'-5'-oligoadenylate synthetase activity	3	0.15772870662460567	0.035268078151592414	OAS2, OAS3, OASL	1539	4	18976	9.24756	1	1	0.9993060374739764
GOTERM_MF_DIRECT	GO:0043771~cytidine kinase activity	3	0.15772870662460567	0.035268078151592414	UCK2, DCK, UCKL1	1539	4	18976	9.24756	1	1	0.9993060374739764
UP_SEQ_FEATURE	DOMAIN:Ig-like C1-type	8	0.4206098843322818	0.0353465	IGLL5, HLA-DRB5, TRAC, HLA-C, TAPBPL, B2M, HLA-DRB1, MICB	1627	40	20583	2.530178242163491	1	1	1
GOTERM_BP_DIRECT	GO:0006260~DNA replication	17	0.8937960042060988	0.0353541	FEN1, RFC4, RNASEH2A, PCNA, LIG4, PTMS, ING4, POLD3, POLD4, POLA2, CHAF1B, DBF4, ORC1, POLD1, GRWD1, MCM6, MCM2	1566	122	19462	1.7317484245126982	1	1	0.9985723026718336
REACTOME_PATHWAY	R-HSA-1428517~The citric acid (TCA) cycle and respiratory electron transport	25	1.3144058885383807	0.0354578	NDUFB7, NDUFB10, NDUFA12, TACO1, COX4I1, NDUFB3, UQCR10, COX5B, COX6A1, COX5A, UQCRH, PDK4, SLC16A3, PDK2, NDUFA9, NDUFA7, NDUFA5, IDH2, NDUFA1, COX6B1, NDUFAF6, UQCRQ, NDUFS5, NDUFAB1, NDUFAF2	1011	178	11009	1.5293846341924227	1	0.41519179751283153	0.403932
UP_KW_BIOLOGICAL_PROCESS	KW-0324~Glycolysis	8	0.4206098843322818	0.0359621	HK3, ALDOC, ENO1, ALDOA, GAPDH, GCK, ENO4, PFKP	980	37	11376	2.509873138444567	0.9958874281709083	0.44952675035528217	0.43454252534343946
INTERPRO	IPR001818:Peptidase M10, metallopeptidase	6	0.31545741324921134	0.0363308	MMP11, MMP14, MMP24, MMP15, MMP1, MMP2	1577	23	19129	3.1643461718728463	1	1	1
INTERPRO	IPR000585:Hemopexin-like domain	6	0.31545741324921134	0.0363308	MMP11, MMP14, MMP24, MMP15, MMP1, MMP2	1577	23	19129	3.1643461718728463	1	1	1
INTERPRO	IPR021190:Peptidase M10A	6	0.31545741324921134	0.0363308	MMP11, MMP14, MMP24, MMP15, MMP1, MMP2	1577	23	19129	3.1643461718728463	1	1	1
INTERPRO	IPR003988:Intercellular adhesion molecule	3	0.15772870662460567	0.0363747	ICAM2, ICAM5, ICAM1	1577	4	19129	9.097495244134432	1	1	1
INTERPRO	IPR006116:2-5-oligoadenylate synthetase, N-terminal	3	0.15772870662460567	0.0363747	OAS2, OAS3, OASL	1577	4	19129	9.097495244134432	1	1	1
INTERPRO	IPR026774:2'-5'-oligoadenylate synthase	3	0.15772870662460567	0.0363747	OAS2, OAS3, OASL	1577	4	19129	9.097495244134432	1	1	1
INTERPRO	IPR018952:2'-5'-oligoadenylate synthetase 1, domain 2/C-terminal	3	0.15772870662460567	0.0363747	OAS2, OAS3, OASL	1577	4	19129	9.097495244134432	1	1	1
INTERPRO	IPR021805:Peptidase M10A, matrix metallopeptidase, C-terminal	3	0.15772870662460567	0.0363747	MMP14, MMP24, MMP15	1577	4	19129	9.097495244134432	1	1	1
INTERPRO	IPR006117:2-5-oligoadenylate synthetase, conserved site	3	0.15772870662460567	0.0363747	OAS2, OAS3, OASL	1577	4	19129	9.097495244134432	1	1	1
INTERPRO	IPR001050:Syndecan	3	0.15772870662460567	0.0363747	SDC4, SDC2, SDC1	1577	4	19129	9.097495244134432	1	1	1
INTERPRO	IPR024706:Peroxiredoxin, AhpC-type	3	0.15772870662460567	0.0363747	PRDX4, PRDX1, PRDX6	1577	4	19129	9.097495244134432	1	1	1
REACTOME_PATHWAY	R-HSA-1234176~Oxygen-dependent proline hydroxylation of Hypoxia-inducible Factor Alpha	12	0.6309148264984227	0.0365753	PSMD9, PSMA3, PSMB4, PSMC3, PSMD4, PSMA2, PSMC4, PSMB3, PSMC1, PSME1, PSMF1, RBX1	1011	66	11009	1.9798579264454637	1	0.42540244577629527	0.4138652761562803
REACTOME_PATHWAY	R-HSA-70263~Gluconeogenesis	8	0.4206098843322818	0.0369648	SLC37A2, SLC37A1, ALDOC, ENO1, ALDOA, SLC25A12, GAPDH, ENO4	1011	35	11009	2.488964250388583	1	0.4270660937976817	0.4154838050449459
GOTERM_MF_DIRECT	GO:0005102~receptor binding	45	2.365930599369085	0.0373054	CCL13, FCN2, STOML2, MSTN, LAMA3, PLG, FASLG, TNFSF13B, PANX1, PRDX5, TESPA1, CNPY4, NPY, SIX3, CCL2, APOE, RSPO1, TIGIT, SLC39A1, WNT2, MICB, FGA, SYK, ANGPT1, RARRES2, F2R, WNT5A, CRTAM, FN1, FZD8, HLA-C, GFRA3, IL17RC, CD2, F7, CXCL10, AR, MT-RNR2, LCK, DNAJB11, AKAP9, CAPRIN2, ANGPTL4, GAS6, HCST	1539	412	18976	1.3467325271106567	1	1	0.9993060374739764
INTERPRO	IPR012163:Sialyltransferase	5	0.26288117770767616	0.0374672	ST6GAL1, ST8SIA1, ST8SIA2, ST8SIA6, ST6GALNAC5	1577	16	19129	3.7906230183893475	1	1	1
REACTOME_PATHWAY	R-HSA-164938~Nef-mediates down modulation of cell surface receptors by recruiting them to clathrin adapters	6	0.31545741324921134	0.0378449	ARF1, CD4, LCK, AP2S1, B2M, AP1M1	1011	21	11009	3.1112053129857284	1	0.4314818777979746	0.4197798303331709
REACTOME_PATHWAY	R-HSA-5651801~PCNA-Dependent Long Patch Base Excision Repair	6	0.31545741324921134	0.0378449	POLD3, POLD4, FEN1, RFC4, PCNA, POLD1	1011	21	11009	3.1112053129857284	1	0.4314818777979746	0.4197798303331709
UP_KW_MOLECULAR_FUNCTION	KW-0575~Peroxidase	6	0.31545741324921134	0.038121	PRDX5, PRDX4, GPX1, PRDX1, PRDX6, PTGS1	909	25	11871	3.1342574257425744	0.9802682807512062	0.7700441274289432	0.7700441274289432
GOTERM_BP_DIRECT	GO:0090148~membrane fission	8	0.4206098843322818	0.0383882	HGS, VPS4A, CHMP3, CHMP4A, VPS37B, VPS25, VPS28, CHMP5	1566	40	19462	2.4855683269476376	1	1	0.9985723026718336
GOTERM_BP_DIRECT	GO:0033077~T cell differentiation in thymus	8	0.4206098843322818	0.0383882	STAT5A, PRR7, CDK6, TESPA1, FZD8, LIG4, IL2RG, B2M	1566	40	19462	2.4855683269476376	1	1	0.9985723026718336
REACTOME_PATHWAY	R-HSA-195253~Degradation of beta-catenin by the destruction complex	14	0.7360672975814931	0.0383946	PPP2R5D, RBX1, PPP2CA, PSMD9, PSMA3, PSMB4, PSMC3, PSMD4, PSMC4, PSMA2, PSMB3, PSMC1, PSME1, PSMF1	1011	83	11009	1.836735666702418	1	0.43488802057268355	0.42309359647175093
BIOCARTA	h_tcytotoxicPathway:T Cytotoxic Cell Surface Molecules	5	0.26288117770767616	0.038764803723443424	CD2, THY1, ITGAL, CD3E, ICAM1	186	12	1623	3.635752688172043	0.9998630145338164	1	1
GOTERM_CC_DIRECT	GO:1904813~ficolin-1-rich granule lumen	17	0.8937960042060988	0.0389913	JUP, GMFG, ARPC5, MIF, APEH, HK3, COMMD9, PRDX4, PSMC3, GLB1, PSMA2, TIMP2, COTL1, ALDOC, ALDOA, PPIA, CTSB	1642	125	20660	1.711181485992692	0.9999999999999998	0.8466678540405472	0.8364558514150582
REACTOME_PATHWAY	R-HSA-1234174~Cellular response to hypoxia	13	0.6834910620399579	0.0394741	RBX1, PSMD9, PSMA3, PSMB4, PSMC3, PSMD4, PSMC4, PSMA2, PSMB3, PSMC1, PSME1, CA9, PSMF1	1011	75	11009	1.8874645565446753	1	0.439223	0.42731116060330804
REACTOME_PATHWAY	R-HSA-9833482~PKR-mediated signaling	13	0.6834910620399579	0.0394741	UBE2I, FANCM, FANCA, ISG15, UBE2L6, DUS2, PPP2CA, HERC5, TUBB1, TRIM25, IKBKG, MAP2K6, SNCA	1011	75	11009	1.8874645565446753	1	0.439223	0.42731116060330804
UP_SEQ_FEATURE	DOMAIN:KRAB	45	2.365930599369085	0.039606188760693474	ZNF671, ZNF154, ZNF493, ZNF273, ZNF43, KRBOX4, ZFP14, ZKSCAN7, POM121C, ZNF429, ZNF84, ZNF548, ZNF404, ZNF568, ZNF225, ZNF665, ZNF585B, ZNF445, ZNF620, ZNF785, ZNF169, ZNF223, ZNF586, ZNF443, ZNF587B, ZNF585A, ZNF100, ZNF584, ZNF19, ZNF483, ZNF141, ZNF33A, ZNF419, ZNF814, ZNF418, ZNF439, ZNF337, ZNF436, ZNF776, ZNF655, ZNF577, ZNF552, ZNF431, ZNF233, ZNF211	1627	425	20583	1.3395061282042011	1	1	1
UP_KW_LIGAND	KW-0460~Magnesium	69	3.627760252365931	0.0396586	FEN1, SRXN1, MAST3, CIB2, ITGAE, ENO1, ITGAL, NIPAL4, ZC3H12D, SMPD3, RPS6KA3, RPS6KA6, IMPA2, TUBB1, MAP3K8, ITGB7, MAP3K6, SEPHS2, ENTPD2, PPTC7, ENTPD5, IPMK, ACSL6, LIG4, ACSL5, GTPBP8, MAT1A, PHOSPHO2, OAS2, ILVBL, OAS3, GPRIN1, TUT1, PRKCQ, DCTPP1, PDE9A, PRTFDC1, PRPS2, PRKAA2, INPP1, PPM1M, SLC41A1, ATP1A2, ATP10A, PKMYT1, ADCY7, GNA13, NT5DC1, NUAK2, ORC1, NT5DC2, FIGNL1, PPP1R8, LHPP, E…	569	673	6902	1.2436458216364572	0.8172412409283235	1	1
REACTOME_PATHWAY	R-HSA-109581~Apoptosis	25	1.3144058885383807	0.0397008	FASLG, UACA, PSMD9, CASP7, PSMB4, PSMD4, PSMB3, E2F1, PMAIP1, SFN, BAK1, PSMF1, CD14, YWHAG, DCC, TRAF2, YWHAZ, PSMA3, PSMC3, PSMC4, PSMA2, PSMC1, PSME1, PRKCQ, PLEC	1011	180	11009	1.5123914715902849	1	0.439223	0.42731116060330804
GOTERM_BP_DIRECT	GO:0007094~mitotic spindle assembly checkpoint	7	0.36803364879074657	0.0397449	CDC20, PLK1, BIRC5, TTK, BUB1, SPC24, ZWINT	1566	32	19462	2.718590357598978	1	1	0.9985723026718336
GOTERM_BP_DIRECT	GO:0045664~regulation of neuron differentiation	7	0.36803364879074657	0.0397449	NLGN1, EFNA3, RELN, EYA1, ID2, YWHAG, CDON	1566	32	19462	2.718590357598978	1	1	0.9985723026718336
REACTOME_PATHWAY	R-HSA-446652~Interleukin-1 family signaling	22	1.1566771819137749	0.0397911	TRAF2, USP18, RBX1, SIGIRR, PSMD9, PSMA3, PSMB4, IL18RAP, PSMC3, PSMD4, PSMC4, IRAK2, PSMA2, PSMB3, PSMC1, PSME1, MAP3K8, IKBKG, PTPN7, PSMF1, MYD88, MAP2K6	1011	153	11009	1.5657699941170005	1	0.439223	0.42731116060330804
GOTERM_BP_DIRECT	GO:0042130~negative regulation of T cell proliferation	9	0.47318611987381703	0.040281	SPN, IL4I1, PLA2G2D, SDC4, GPNMB, CTLA4, PDE5A, HLA-DRB1, TNFRSF21	1566	49	19462	2.2826647900539525	1	1	0.9985723026718336
GOTERM_BP_DIRECT	GO:0051092~positive regulation of NF-kappaB transcription factor activity	21	1.1041009463722398	0.0403183	CD40, TFRC, PRKCB, WNT5A, TRAF2, PYCARD, GREM1, AR, IL18RAP, AIM2, IRAK2, CTH, TRIM25, ADAM8, PRKCQ, IKBKG, LGALS9, PPIA, TRIM21, MYD88, TRIM22	1566	164	19462	1.5913699654237923	1	1	0.9985723026718336
GOTERM_BP_DIRECT	GO:0044346~fibroblast apoptotic process	4	0.2103049421661409	0.040565833862774625	CASP7, BAK1, NUPR1, GAS6	1566	10	19462	4.971136653895275	1	1	0.9985723026718336
GOTERM_BP_DIRECT	GO:0034340~response to type I interferon	4	0.2103049421661409	0.040565833862774625	SHMT2, MX1, ISG15, IKBKE	1566	10	19462	4.971136653895275	1	1	0.9985723026718336
GOTERM_BP_DIRECT	GO:0050863~regulation of T cell activation	4	0.2103049421661409	0.040565833862774625	SPN, CD4, CRTAM, PAG1	1566	10	19462	4.971136653895275	1	1	0.9985723026718336
KEGG_PATHWAY	hsa04714:Thermogenesis	30	1.5772870662460567	0.0406458	NDUFB7, PRKAA2, NDUFB10, NDUFA12, COX4I1, NDUFB3, UQCR10, COX5B, COX6A1, COX5A, ADCY7, UQCRH, ACTB, RPS6KA3, RPS6KA6, DPF3, COA4, NDUFA9, NDUFA7, NDUFA5, ACSL6, NDUFA1, BMP8A, ACSL5, COX6B1, NDUFAF6, UQCRQ, NDUFS5, NDUFAB1, NDUFAF2	770	232	8586	1.4418943125839678	0.9999992221822894	0.47513514268475154	0.45411146380489525
REACTOME_PATHWAY	R-HSA-3000171~Non-integrin membrane-ECM interactions	11	0.5783385909568874	0.040681	COL1A1, COL3A1, COL1A2, SDC4, SDC2, LAMA3, FN1, COL4A5, SDC1, THBS1, FGF2	1011	59	11009	2.0301932974567887	1	0.4406265085617083	0.42867645322275827
REACTOME_PATHWAY	R-HSA-5676590~NIK-->noncanonical NF-kB signaling	11	0.5783385909568874	0.040681	PSMD9, PSMA3, PSMB4, PSMC3, PSMD4, PSMA2, PSMC4, PSMB3, PSMC1, PSME1, PSMF1	1011	59	11009	2.0301932974567887	1	0.4406265085617083	0.42867645322275827
REACTOME_PATHWAY	R-HSA-5387390~Hh mutants abrogate ligand secretion	11	0.5783385909568874	0.040681	PSMD9, PSMA3, PSMB4, PSMC3, PSMD4, PSMA2, PSMC4, PSMB3, PSMC1, PSME1, PSMF1	1011	59	11009	2.0301932974567887	1	0.4406265085617083	0.42867645322275827
GOTERM_BP_DIRECT	GO:0007052~mitotic spindle organization	10	0.5257623554153523	0.0409178	FAM110A, SUN2, CENPH, PLK1, CDCA8, BIRC5, TTK, TUBG1, DLGAP5, RAN	1566	58	19462	2.14273	1	1	0.9985723026718336
GOTERM_CC_DIRECT	GO:0031092~platelet alpha granule membrane	5	0.26288117770767616	0.040920919186585164	CYB5R1, SPARC, CD9, PHACTR2, SNCA	1642	17	20660	3.700652002579351	1	0.8590000565201399	0.8486393102243927
GOTERM_CC_DIRECT	GO:0031093~platelet alpha granule lumen	11	0.5783385909568874	0.041443	SRGN, FGA, ISLR, F8, SPARC, FN1, SERPING1, PLG, ALDOA, GAS6, THBS1	1642	68	20660	2.035358601418643	1	0.8590000565201399	0.8486393102243927
KEGG_PATHWAY	hsa04151:PI3K-Akt signaling pathway	43	2.260778128286015	0.0424169	TNXB, PRKAA2, FLT4, LAMA3, FASLG, THBS2, EFNA5, IL2RG, FGF2, THBS1, PIK3R5, PPP2CA, COMP, FGF7, RELN, CCND2, FGF9, SPP1, EIF4EBP1, ITGB7, IKBKG, IL6R, YWHAG, SYK, ANGPT1, F2R, FN1, PPP2R5D, YWHAZ, COL1A1, EFNA3, CDK6, COL1A2, LPAR5, CCNE2, CCNE1, CDK4, DDIT4, ITGA11, IL2RB, GNB4, COL4A5, PKN1	770	359	8586	1.3355930977100892	0.9999995842565096	0.47724076425726075	0.45612391628127585
REACTOME_PATHWAY	R-HSA-167590~Nef Mediated CD4 Down-regulation	4	0.2103049421661409	0.0424577	ARF1, CD4, LCK, AP2S1	1011	9	11009	4.83965	1	0.4570132380103468	0.4446187647348209
GOTERM_BP_DIRECT	GO:0050862~positive regulation of T cell receptor signaling pathway	5	0.26288117770767616	0.0425355	TESPA1, LCK, CCR7, IKBKG, LIPA	1566	17	19462	3.6552475396288786	1	1	0.9985723026718336
INTERPRO	IPR018487:Hemopexin-like repeats	6	0.31545741324921134	0.0428818	MMP11, MMP14, MMP24, MMP15, MMP1, MMP2	1577	24	19129	3.0324984147114775	1	1	1
REACTOME_PATHWAY	R-HSA-5368287~Mitochondrial translation	15	0.7886435331230284	0.043564094066258253	MRPS28, MRPS35, MRPS14, MRPL16, MRPL17, MRPS21, MRPL36, ERAL1, MRPL48, MRPL13, MRPL24, MRPL22, MRPL44, MRPL51, MRPL9	1011	93	11009	1.7563255799112985	1	0.4660282408446022	0.4533892752821692
INTERPRO	IPR008952:Tetraspanin, EC2 domain	7	0.36803364879074657	0.0439573	CD151, CD82, TSPAN17, TSPAN7, TSPAN4, CD9, CD37	1577	32	19129	2.6534361128725426	1	1	1
REACTOME_PATHWAY	R-HSA-451927~Interleukin-2 family signaling	9	0.47318611987381703	0.0444217	STAT5A, IL15RA, SYK, LCK, IL2RB, IL21R, STAT4, LGALS9, IL2RG	1011	44	11009	2.2273401672511466	1	0.4683481918673457	0.4556463078409377
REACTOME_PATHWAY	R-HSA-2473224~Antagonism of Activin by Follistatin	3	0.15772870662460567	0.044505954623608346	INHBB, INHBA, FSTL3	1011	4	11009	8.166913946587536	1	0.4683481918673457	0.4556463078409377
GOTERM_BP_DIRECT	GO:0070527~platelet aggregation	9	0.47318611987381703	0.0447087	COMP, FGA, RAP2B, UBASH3B, TUBB1, FN1, PPIA, MYL9, ACTB	1566	50	19462	2.2370114942528736	1	1	0.9985723026718336
REACTOME_PATHWAY	R-HSA-162588~Budding and maturation of HIV virion	7	0.36803364879074657	0.044717941497727835	VPS4A, CHMP3, CHMP4A, VPS37B, PPIA, VPS28, CHMP5	1011	29	11009	2.628432074763805	1	0.4683481918673457	0.4556463078409377
UP_KW_CELLULAR_COMPONENT	KW-0493~Microtubule	34	1.7875920084121977	0.0447433	RGS14, DNAH7, DNAH6, KATNB1, DNAH9, JAKMIP1, SKA2, KLC3, MAP1LC3A, RACGAP1, HAUS8, RASSF3, TUBB1, KIF5A, MAP6, GTSE1, RCC2, HAUS3, MTUS2, HAUS5, TUBG1, MID1, SIRT2, DCDC1, TPX2, TTLL4, PRC1, KIF26A, KIFC1, BIRC5, MAPRE3, KIF2C, KIF20A, KIFC3	1461	297	17831	1.3971658174259132	0.935849	0.28455053756691717	0.2608379927696741
REACTOME_PATHWAY	R-HSA-5607761~Dectin-1 mediated noncanonical NF-kB signaling	11	0.5783385909568874	0.044972462827500725	PSMD9, PSMA3, PSMB4, PSMC3, PSMD4, PSMA2, PSMC4, PSMB3, PSMC1, PSME1, PSMF1	1011	60	11009	1.9963567424991757	1	0.4683481918673457	0.4556463078409377
KEGG_PATHWAY	hsa04260:Cardiac muscle contraction	14	0.7360672975814931	0.045108	TPM3, COX4I1, ATP1A2, ATP1B2, UQCR10, COX5B, COX6A1, COX5A, UQCRH, SLC8A2, COX6B1, CACNB2, SLC9A7, UQCRQ	770	87	8586	1.7943573667711596	0.9999998398622577	0.47724076425726075	0.45612391628127585
GOTERM_CC_DIRECT	GO:0031965~nuclear membrane	30	1.5772870662460567	0.045241539385950325	RETSAT, MRPS14, EI24, MRGPRF, YEATS4, APEH, AK9, TMEM168, CCND2, POM121C, TMEM38A, RRP12, TMEM38B, LBR, SLC16A3, IL15RA, SUN2, CMTM3, MX1, TMC8, MAD2L1BP, NUTF2, GTPBP4, PML, TBC1D20, CDK4, ALOX5AP, LPIN1, GAPDH, SLC29A2	1642	263	20660	1.4352338565136646	1	0.9168951982219266	0.9058361552609165
BIOCARTA	h_mcmPathway:CDK Regulation of DNA Replication	6	0.31545741324921134	0.045294440087231505	CDT1, ORC1, CCNE1, MCM3, MCM6, MCM2	186	18	1623	2.9086021505376345	0.9999704452936716	1	1
REACTOME_PATHWAY	R-HSA-5632684~Hedgehog 'on' state	14	0.7360672975814931	0.0453495	RBX1, PSMD9, PSMA3, PSMB4, PSMC3, PSMD4, SMO, PSMC4, PSMA2, PSMB3, PSMC1, PSME1, PSMF1, CDON	1011	85	11009	1.7935183568976552	1	0.4683481918673457	0.4556463078409377
REACTOME_PATHWAY	R-HSA-202427~Phosphorylation of CD3 and TCR zeta chains	6	0.31545741324921134	0.0454025	HLA-DRB5, CD4, LCK, CD3E, PAG1, HLA-DRB1	1011	22	11009	2.9697868896681956	1	0.4683481918673457	0.4556463078409377
GOTERM_BP_DIRECT	GO:0031175~neuron projection development	17	0.8937960042060988	0.0455394	NLGN1, TNXB, NEGR1, PRMT1, RASGRF1, PTPRM, STMN3, FRY, RGMA, BLOC1S5, BLOC1S1, GPRIN1, NPY, RAC3, PHGDH, APOE, RAB6A	1566	126	19462	1.6767722840519776	1	1	0.9985723026718336
GOTERM_BP_DIRECT	GO:0032438~melanosome organization	6	0.31545741324921134	0.045886163838776216	RAB32, PMEL, BLOC1S5, BLOC1S1, APOE, AP1M1	1566	25	19462	2.982681992337165	1	1	0.9985723026718336
GOTERM_MF_DIRECT	GO:0005518~collagen binding	11	0.5783385909568874	0.0464853	COMP, SPARC, TNXB, LOX, ITGA11, SERPINH1, FN1, RELL2, PPIB, COCH, CTSB	1539	68	18976	1.9945724878645414	1	1	0.9993060374739764
GOTERM_BP_DIRECT	GO:0034599~cellular response to oxidative stress	14	0.7360672975814931	0.046734212433731125	NQO1, G6PD, PRKAA2, GPX1, SRXN1, PYROXD1, HM13, PYCR1, PYCR2, SIRT2, PRDX5, CCS, PPIA, SNCA	1566	97	19462	1.7937091019209752	1	1	0.9985723026718336
KEGG_PATHWAY	hsa00030:Pentose phosphate pathway	7	0.36803364879074657	0.046814005101128014	PRPS2, G6PD, GLYCTK, ALDOC, PGLS, ALDOA, PFKP	770	30	8586	2.6018181818181816	0.9999999126577749	0.47724076425726075	0.45612391628127585
UP_SEQ_FEATURE	CARBOHYD:N-linked (GlcNAc...) asparagine	377	19.82124079915878	0.0471616	NPFFR2, SPON1, SPARC, TFRC, TMEM200A, SLC23A1, MRGPRF, ICAM2, OGFOD3, RRH, DMP1, ICAM5, LIPA, IL27RA, ICAM1, NIPAL4, IL4I1, ISLR, GPR176, VSIG2, PIEZO1, PTGFRN, SLC12A8, SCN1A, CDON, IL15RA, SLC34A2, ST6GAL1, ENTPD2, GLCE, ENTPD5, HLA-C, SLC6A12, MOGS, JMJD8, RNASE1, TAS2R19, SIGIRR, FNDC1, ERVW-1, MXRA8, OR4C12, SERPING1, FREM1, CD101, PLA1A, SLC22A4, SLC45A2, RPN2, IGSF1, TAS2R46, SLC5A1, MST1R…	1627	4417	20583	1.0797794852791898	1	1	1
PIR_SUPERFAMILY	PIRSF001191:matrix metalloproteinase, stromelysin type	6	0.31545741324921134	0.047213145451946985	MMP11, MMP14, MMP24, MMP15, MMP1, MMP2	184	20	1776	2.8956521739130436	0.9993885643409498	1	1
UP_KW_CELLULAR_COMPONENT	KW-0256~Endoplasmic reticulum	129	6.782334384858044	0.0474251	KDELR1, SLC35B1, AUP1, PYCARD, CYP4Z1, PIEZO1, PTGFRN, TMEM38B, SLC39A1, IL15RA, TOR3A, ENTPD2, RSAD2, ENTPD5, ACSL6, HLA-C, ALG3, ACSL5, CNPY2, MOGS, PDIA6, JMJD8, CYP39A1, IFI27, SOAT1, ILVBL, DNAJB11, KDELR2, PPIB, PDE9A, RNF122, GRIA2, LRRC59, PMEL, RTN1, RPN2, RETSAT, CRABP2, SLC35D1, PEF1, TAPBPL, PKMYT1, APH1A, PTDSS1, PRDX4, POM121C, TESPA1, RDH10, SERPINH1, HMOX1, OTOF, PSMF1, OST4, HLA-…	1461	1358	17831	1.1593522906315303	0.9458063609823415	0.28455053756691717	0.2608379927696741
GOTERM_BP_DIRECT	GO:0001895~retina homeostasis	8	0.4206098843322818	0.0483877	PIGR, PRDX1, ATP1B2, LYZ, B2M, BBS4, ACTB, SOD1	1566	42	19462	2.3672079304263214	1	1	0.9985723026718336
GOTERM_BP_DIRECT	GO:0045333~cellular respiration	8	0.4206098843322818	0.0483877	UQCRQ, COX4I1, UQCR10, COX5B, COX6A1, COX5A, UQCRH, COX6B1	1566	42	19462	2.3672079304263214	1	1	0.9985723026718336
GOTERM_BP_DIRECT	GO:0043967~histone H4 acetylation	8	0.4206098843322818	0.0483877	NAA40, ZZZ3, MRGBP, VPS72, IRF4, YEATS4, DMAP1, ACTB	1566	42	19462	2.3672079304263214	1	1	0.9985723026718336
GOTERM_BP_DIRECT	GO:0036211~protein modification process	13	0.6834910620399579	0.048854624479966594	UBL4A, CDKL3, UBE2I, USP6, RPN2, UBA7, ST8SIA2, ARAF, NEDD8, UBE2L6, LOX, MMP15, UBE2S	1566	88	19462	1.835931150586323	1	1	0.9985723026718336
GOTERM_BP_DIRECT	GO:0070374~positive regulation of ERK1 and ERK2 cascade	27	1.4195583596214512	0.0488816	CCL13, SEMA7A, FLT4, FGF2, ICAM1, PYCARD, P2RY6, CCL8, GPNMB, DDT, NPY, CCL2, CCR7, APOE, LGALS9, FGA, CD74, ANGPT1, F2R, INHBA, MIF, ACTA2, MFHAS1, CD4, CHI3L1, GAS6, HLA-DRB1	1566	230	19462	1.458920539730135	1	1	0.9985723026718336
KEGG_PATHWAY	hsa05340:Primary immunodeficiency	8	0.4206098843322818	0.049039539225643525	CD4, CD40, LCK, TNFRSF13C, IKBKG, CD3E, IL2RG, ICOS	770	38	8586	2.347505126452495	0.9999999604566022	0.47724076425726075	0.45612391628127585
KEGG_PATHWAY	hsa03060:Protein export	6	0.31545741324921134	0.0492726	SEC61A1, IMMP2L, SPCS2, SEC61G, SRPRB, SEC61B	770	23	8586	2.9088650479954827	0.9999999636101271	0.47724076425726075	0.45612391628127585
KEGG_PATHWAY	hsa03430:Mismatch repair	6	0.31545741324921134	0.0492726	POLD3, POLD4, RFC4, PCNA, POLD1, MLH3	770	23	8586	2.9088650479954827	0.9999999636101271	0.47724076425726075	0.45612391628127585
GOTERM_CC_DIRECT	GO:0043034~costamere	5	0.26288117770767616	0.0494083	KRT19, SDC4, AHNAK2, KRT8, PLEC	1642	18	20660	3.4950602246582756	1	0.9676447213544959	0.955974
UP_SEQ_FEATURE	MOTIF:Cysteine switch	8	0.4206098843322818	0.0498518	MMP11, MMP14, MMP24, ADAM15, MMP15, MMP1, MMP2, ADAM20	1627	43	20583	2.3536541787567358	1	1	1
GOTERM_BP_DIRECT	GO:0006464~cellular protein modification process	14	0.7360672975814931	0.050087	UBL4A, LIPT2, CDKL3, UBE2I, USP6, RPN2, UBA7, ST8SIA2, ARAF, NEDD8, UBE2L6, LOX, MMP15, UBE2S	1566	98	19462	1.775405947819741	1	1	0.9985723026718336
REACTOME_PATHWAY	R-HSA-1643685~Disease	180	9.46372	0.050400065077040104	SPON1, ZFYVE9, ARAF, IRS2, ENO1, FGF2, ACTB, PPP1CB, PYCARD, PSMD9, FGF7, CCND2, PSMD4, FGF9, SNRPD1, FGFR1OP2, TUBB1, TRIM25, B2M, GOLGA7, IL6R, ZBP1, SLC34A2, ST6GAL1, TPM3, ENTPD5, SLC35C1, WNT5A, ALG2, HLA-C, LIG4, ALG3, MOGS, MAT1A, ATP1B2, RBX1, CYP27A1, CCNE2, CCNE1, HGS, AKAP9, PSME1, TXNIP, SERPING1, CHMP4A, PPIB, VPS25, PPIA, VPS28, SNRPB, RPN2, SLC35D1, SDC4, SDC2, SUPT4H1, SLC5A1, ANA…	1011	1746	11009	1.1225998552010361	1	0.5168243359675178	0.5028077498218321
GOTERM_BP_DIRECT	GO:0032729~positive regulation of interferon-gamma production	12	0.6309148264984227	0.0508405	CD2, PYCARD, SLC7A5, WNT5A, CRTAM, CEBPG, ISG15, SLAMF6, CD14, LGALS9, CD3E, IL27RA	1566	79	19462	1.8877734128716233	1	1	0.9985723026718336
GOTERM_CC_DIRECT	GO:0034663~endoplasmic reticulum chaperone complex	4	0.2103049421661409	0.050928669544973465	DNAJB11, P4HB, PPIB, PDIA6	1642	11	20660	4.575351566825379	1	0.9676447213544959	0.955974
GOTERM_CC_DIRECT	GO:0071162~CMG complex	4	0.2103049421661409	0.050928669544973465	CDC45, MCM3, MCM6, MCM2	1642	11	20660	4.575351566825379	1	0.9676447213544959	0.955974
UP_KW_MOLECULAR_FUNCTION	KW-0560~Oxidoreductase	59	3.1019978969505786	0.0511552	SRXN1, PYROXD1, OGFOD3, COX6A1, CYP4Z1, IL4I1, ALKBH4, AIFM2, PHGDH, DUS4L, HADH, LBR, AASS, HTATIP2, JMJD4, G6PD, GPX1, CYP3A43, DHDH, KCNAB2, CYB561A3, YWHAZ, DUS2, CYP27A1, CYP39A1, CYP2A7, ALDH1A3, LOX, CYP21A2, BLVRB, GAPDH, TPH1, MAOB, RETSAT, COX5A, PTGS1, CYB5R1, ADH4, PRDX5, PRDX4, CYP11A1, PRDX1, RDH10, HSD17B1, HMOX1, PRODH, NQO1, SRD5A1, IDH2, PYCR1, PYCR2, CP, CYP4F12, PRDX6, SOD1, C…	909	612	11871	1.2589950171487738	0.9950259291663002	0.840542	0.840542
REACTOME_PATHWAY	R-HSA-5668914~Diseases of metabolism	32	1.6824395373291272	0.0512926	SPON1, SLC35D1, SDC4, SDC2, PRELP, THBS2, OPLAH, THBS1, CYP11A1, MUC12, GPC4, CTSA, SLC34A2, CHST6, MUC16, MUC19, C1GALT1, ALG2, ALG3, B3GALT6, MOGS, MAT1A, MUC5B, MUC5AC, ADAMTS20, APRT, CYP27A1, GCLC, GLB1, CYP21A2, SDC1, GALK1	1011	250	11009	1.3938199802176063	1	0.5228829340279677	0.5087020350670246
GOTERM_BP_DIRECT	GO:0000398~mRNA splicing, via spliceosome	24	1.2618296529968454	0.052156751106447956	SF3B5, RBM14, PRPF38B, PPIL1, SNRPN, SF3A2, ALYREF, CWC15, RNPC3, LSM3, PNN, SART1, DDX39A, DDX39B, SNRPD1, NOVA1, RBM41, RBM42, SNRNP27, RALY, SNRPC, SNRPA, CTNNBL1, SNRPB	1566	200	19462	1.4913409961685824	1	1	0.9985723026718336
GOTERM_BP_DIRECT	GO:1904668~positive regulation of ubiquitin protein ligase activity	4	0.2103049421661409	0.0525236	CDC20, UBE2C, UBE2S, PLK1	1566	11	19462	4.519215139904795	1	1	0.9985723026718336
GOTERM_BP_DIRECT	GO:0048771~tissue remodeling	4	0.2103049421661409	0.0525236	MMP14, MMP2, PLG, LIPA	1566	11	19462	4.519215139904795	1	1	0.9985723026718336
GOTERM_BP_DIRECT	GO:0038063~collagen-activated tyrosine kinase receptor signaling pathway	4	0.2103049421661409	0.0525236	COL1A1, SYK, UBASH3B, COL4A5	1566	11	19462	4.519215139904795	1	1	0.9985723026718336
KEGG_PATHWAY	hsa00190:Oxidative phosphorylation	19	0.9989484752891693	0.052796558022694874	NDUFA9, NDUFA7, NDUFB7, NDUFB10, NDUFA5, NDUFA12, COX4I1, NDUFB3, NDUFA1, UQCR10, COX5B, COX6A1, COX5A, UQCRH, COX6B1, UQCRQ, NDUFS5, NDUFAB1, LHPP	770	134	8586	1.581062221360729	0.9999999896660181	0.49716758804704336	0.4751690222042539
UP_SEQ_FEATURE	REPEAT:TSP type-3 8	3	0.15772870662460567	0.0530972	COMP, THBS2, THBS1	1627	5	20583	7.590534726490473	1	1	1
UP_SEQ_FEATURE	REPEAT:TSP type-3 7	3	0.15772870662460567	0.0530972	COMP, THBS2, THBS1	1627	5	20583	7.590534726490473	1	1	1
UP_SEQ_FEATURE	REPEAT:TSP type-3 3	3	0.15772870662460567	0.0530972	COMP, THBS2, THBS1	1627	5	20583	7.590534726490473	1	1	1
UP_SEQ_FEATURE	REPEAT:TSP type-3 6	3	0.15772870662460567	0.0530972	COMP, THBS2, THBS1	1627	5	20583	7.590534726490473	1	1	1
UP_SEQ_FEATURE	REPEAT:TSP type-3 4	3	0.15772870662460567	0.0530972	COMP, THBS2, THBS1	1627	5	20583	7.590534726490473	1	1	1
UP_SEQ_FEATURE	REPEAT:TSP type-3	3	0.15772870662460567	0.0530972	COMP, THBS2, THBS1	1627	5	20583	7.590534726490473	1	1	1
UP_SEQ_FEATURE	DOMAIN:TSP C-terminal	3	0.15772870662460567	0.0530972	COMP, THBS2, THBS1	1627	5	20583	7.590534726490473	1	1	1
UP_SEQ_FEATURE	REPEAT:TSP type-3 2	3	0.15772870662460567	0.0530972	COMP, THBS2, THBS1	1627	5	20583	7.590534726490473	1	1	1
UP_SEQ_FEATURE	MOTIF:Arginine finger	3	0.15772870662460567	0.0530972	MCM3, MCM6, MCM2	1627	5	20583	7.590534726490473	1	1	1
UP_SEQ_FEATURE	REPEAT:TSP type-3 1	3	0.15772870662460567	0.0530972	COMP, THBS2, THBS1	1627	5	20583	7.590534726490473	1	1	1
UP_SEQ_FEATURE	REPEAT:TSP type-3 5	3	0.15772870662460567	0.0530972	COMP, THBS2, THBS1	1627	5	20583	7.590534726490473	1	1	1
REACTOME_PATHWAY	R-HSA-5628897~TP53 Regulates Metabolic Genes	14	0.7360672975814931	0.053135933769952806	G6PD, PRKAA2, TACO1, COX4I1, COX5B, COX6A1, COX5A, YWHAZ, COX6B1, PRDX5, PRDX1, DDIT4, SFN, YWHAG	1011	87	11009	1.7522880498425366	1	0.5377531021610745	0.5231689153165446
GOTERM_MF_DIRECT	GO:0061133~endopeptidase activator activity	4	0.2103049421661409	0.0535695	APH1A, PSENEN, APH1B, PSME1	1539	11	18976	4.483667080158308	1	1	0.9993060374739764
GOTERM_MF_DIRECT	GO:0042608~T cell receptor binding	4	0.2103049421661409	0.0535695	STOML2, LCK, CD3E, HLA-DRB1	1539	11	18976	4.483667080158308	1	1	0.9993060374739764
GOTERM_CC_DIRECT	GO:0097487~multivesicular body, internal vesicle	3	0.15772870662460567	0.053631105780942594	LAPTM4B, PMEL, APOE	1642	5	20660	7.549330085261875	1	0.9782313694443928	0.9664325261725855
GOTERM_CC_DIRECT	GO:0043625~delta DNA polymerase complex	3	0.15772870662460567	0.053631105780942594	POLD3, POLD4, POLD1	1642	5	20660	7.549330085261875	1	0.9782313694443928	0.9664325261725855
REACTOME_PATHWAY	R-HSA-8956321~Nucleotide salvage	6	0.31545741324921134	0.053794570337407255	UCK2, AMPD1, TK1, DCK, APRT, UCKL1	1011	23	11009	2.840665720552187	1	0.5377531021610745	0.5231689153165446
UP_SEQ_FEATURE	DOMAIN:VWFC	7	0.36803364879074657	0.0541487	COL1A1, COL3A1, MUC19, MUC5B, THBS2, THBS1, TECTA	1627	35	20583	2.5301782421634913	1	1	1
GOTERM_BP_DIRECT	GO:0097191~extrinsic apoptotic signaling pathway	9	0.47318611987381703	0.0544928	KRT18, IFI27, SIVA1, KRT8, CD27, FASLG, INHBA, IL6R, PML	1566	52	19462	2.150972590627763	1	1	0.9985723026718336
REACTOME_PATHWAY	R-HSA-71387~Metabolism of carbohydrates	37	1.9453207150368035	0.0545152	PRPS2, PFKFB2, SDC4, SDC2, SLC2A1, PRELP, HMMR, ENO1, ENO4, PPP2CA, FUT6, HK3, CHST11, PGLS, GPC4, HS3ST3B1, CSGALNACT1, CHST6, SLC37A2, G6PD, SLC37A1, GLCE, GLYCTK, PHKA1, B3GALT6, PPP2R5D, GCK, B3GNT7, GLB1, B3GNT3, SDC1, ALDOC, SLC25A12, ALDOA, GAPDH, PFKP, GALK1	1011	299	11009	1.3474952776978322	1	0.5377531021610745	0.5231689153165446
REACTOME_PATHWAY	R-HSA-141424~Amplification of signal from the kinetochores	15	0.7886435331230284	0.054613125205048546	CENPT, RCC2, PLK1, CDCA8, PPP2R5D, ZWINT, SKA2, PPP2CA, CDC20, DSN1, CENPH, BIRC5, KIF2C, BUB1, SPC24	1011	96	11009	1.7014404055390702	1	0.5377531021610745	0.5231689153165446
REACTOME_PATHWAY	R-HSA-141444~Amplification of signal from unattached kinetochores via a MAD2 inhibitory signal	15	0.7886435331230284	0.054613125205048546	CENPT, RCC2, PLK1, CDCA8, PPP2R5D, ZWINT, SKA2, PPP2CA, CDC20, DSN1, CENPH, BIRC5, KIF2C, BUB1, SPC24	1011	96	11009	1.7014404055390702	1	0.5377531021610745	0.5231689153165446
REACTOME_PATHWAY	R-HSA-8878159~Transcriptional regulation by RUNX3	15	0.7886435331230284	0.054613125205048546	ITGAL, RUNX3, PSMD9, PSMA3, PSMB4, PSMC3, PSMD4, PSMC4, PSMA2, PSMB3, PSMC1, SPP1, PSME1, PSMF1, TEAD2	1011	96	11009	1.7014404055390702	1	0.5377531021610745	0.5231689153165446
GOTERM_BP_DIRECT	GO:0002138~retinoic acid biosynthetic process	3	0.15772870662460567	0.0548552	ALDH1A3, CRABP2, RDH10	1566	5	19462	7.456704980842911	1	1	0.9985723026718336
GOTERM_BP_DIRECT	GO:0006297~nucleotide-excision repair, DNA gap filling	3	0.15772870662460567	0.0548552	POLD3, POLD1, LIG4	1566	5	19462	7.456704980842911	1	1	0.9985723026718336
GOTERM_BP_DIRECT	GO:0060700~regulation of ribonuclease activity	3	0.15772870662460567	0.0548552	OAS2, OAS3, OASL	1566	5	19462	7.456704980842911	1	1	0.9985723026718336
GOTERM_BP_DIRECT	GO:0046069~cGMP catabolic process	3	0.15772870662460567	0.0548552	PDE2A, PDE5A, PDE9A	1566	5	19462	7.456704980842911	1	1	0.9985723026718336
GOTERM_BP_DIRECT	GO:0097114~NMDA glutamate receptor clustering	3	0.15772870662460567	0.0548552	NLGN1, RELN, APOE	1566	5	19462	7.456704980842911	1	1	0.9985723026718336
GOTERM_BP_DIRECT	GO:1903307~positive regulation of regulated secretory pathway	3	0.15772870662460567	0.0548552	RAB15, RAB3D, UNC13D	1566	5	19462	7.456704980842911	1	1	0.9985723026718336
GOTERM_MF_DIRECT	GO:0050839~cell adhesion molecule binding	11	0.5783385909568874	0.0549191	FGA, NLGN1, VCAM1, JUP, NPHS1, TENM4, CDHR2, ADAM8, ITGB7, ITGAL, TJP3	1539	70	18976	1.9375847024969832	1	1	0.9993060374739764
PIR_SUPERFAMILY	PIRSF000239:peroxiredoxin, AhpC type	3	0.15772870662460567	0.0550963	PRDX4, PRDX1, PRDX6	184	4	1776	7.239130434782608	0.9998284868823889	1	1
UP_SEQ_FEATURE	BINDING:in inhibited form	8	0.4206098843322818	0.055412229295808836	MMP11, MMP14, MMP24, ADAM15, MMP15, MMP1, MMP2, ADAM20	1627	44	20583	2.300162038330446	1	1	1
INTERPRO	IPR003006:Immunoglobulin/major histocompatibility complex, conserved site	11	0.5783385909568874	0.055413029611766904	IGHM, IGLL5, HLA-DRB5, IGLC7, IGLC6, IGLC3, HLA-C, IGLC2, TAPBPL, B2M, HLA-DRB1	1577	69	19129	1.9337671050334058	1	1	1
GOTERM_MF_DIRECT	GO:0051373~FATZ binding	3	0.15772870662460567	0.0556531	TCAP, MYOZ1, MYOZ2	1539	5	18976	7.398050682261209	1	1	0.9993060374739764
GOTERM_MF_DIRECT	GO:0070974~POU domain binding	3	0.15772870662460567	0.0556531	AR, POU2AF1, NFKBIZ	1539	5	18976	7.398050682261209	1	1	0.9993060374739764
REACTOME_PATHWAY	R-HSA-9020958~Interleukin-21 signaling	4	0.2103049421661409	0.0566174	STAT5A, IL21R, STAT4, IL2RG	1011	10	11009	4.35569	1	0.5504545771050081	0.5355259186376478
REACTOME_PATHWAY	R-HSA-2132295~MHC class II antigen presentation	18	0.9463722397476341	0.0567411	CTSA, CD74, ARF1, HLA-DRB5, LAG3, CLTA, KLC3, RACGAP1, KIF26A, TUBB1, KIF5A, AP2S1, KIF2C, KIF20A, HLA-DRB1, CTSB, AP1M1, SPTBN2	1011	123	11009	1.5935441847000071	1	0.5504545771050081	0.5355259186376478
REACTOME_PATHWAY	R-HSA-68867~Assembly of the pre-replicative complex	20	1.0515247108307046	0.056856	CDT1, UBE2C, GMNN, ANAPC11, PSMD9, PSMA3, PSMB4, ORC1, PSMC3, PSMD4, PSMC4, UBE2S, PSMA2, PSMB3, PSMC1, MCM3, PSME1, MCM6, PSMF1, MCM2	1011	141	11009	1.544570013539014	1	0.5504545771050081	0.5355259186376478
GOTERM_BP_DIRECT	GO:0001525~angiogenesis	29	1.5247108307045216	0.057229397401392164	FLT4, SH2D2A, PRKX, THY1, CCL8, FGF9, CALD1, GJA5, HOXA3, CCL2, HMOX1, APOD, HTATIP2, EDN2, SYK, ANGPT1, MMP2, C1GALT1, FN1, FZD8, YWHAZ, PTPRB, MMP14, MEIS1, ADAM15, ADM2, COL8A1, ADAM8, ANGPTL4	1566	255	19462	1.4133623819898329	1	1	0.9985723026718336
INTERPRO	IPR003367:Thrombospondin, type 3-like repeat	3	0.15772870662460567	0.0573468	COMP, THBS2, THBS1	1577	5	19129	7.277996195307545	1	1	1
INTERPRO	IPR000866:Alkyl hydroperoxide reductase subunit C/ Thiol specific antioxidant	3	0.15772870662460567	0.0573468	PRDX4, PRDX1, PRDX6	1577	5	19129	7.277996195307545	1	1	1
INTERPRO	IPR013768:Intercellular adhesion molecule, N-terminal	3	0.15772870662460567	0.0573468	ICAM2, ICAM5, ICAM1	1577	5	19129	7.277996195307545	1	1	1
INTERPRO	IPR008859:Thrombospondin, C-terminal	3	0.15772870662460567	0.0573468	COMP, THBS2, THBS1	1577	5	19129	7.277996195307545	1	1	1
INTERPRO	IPR017897:Thrombospondin, type 3 repeat	3	0.15772870662460567	0.0573468	COMP, THBS2, THBS1	1577	5	19129	7.277996195307545	1	1	1
INTERPRO	IPR019479:Peroxiredoxin, C-terminal	3	0.15772870662460567	0.0573468	PRDX4, PRDX1, PRDX6	1577	5	19129	7.277996195307545	1	1	1
UP_SEQ_FEATURE	MOTIF:Cx9C motif 2	5	0.26288117770767616	0.057821009404970175	COA4, NDUFB7, NDUFS5, CHCHD6, CHCHD10	1627	19	20583	3.3291818975835406	1	1	1
UP_SEQ_FEATURE	MOTIF:Cx9C motif 1	5	0.26288117770767616	0.057821009404970175	COA4, NDUFB7, NDUFS5, CHCHD6, CHCHD10	1627	19	20583	3.3291818975835406	1	1	1
REACTOME_PATHWAY	R-HSA-399719~Trafficking of AMPA receptors	7	0.36803364879074657	0.0593741	GRIA2, PRKCB, TSPAN7, AP2S1, AKAP5, CAMK2G, GRIA3	1011	31	11009	2.4588558118758175	1	0.5684821976044467	0.5530646192504889
REACTOME_PATHWAY	R-HSA-399721~Glutamate binding, activation of AMPA receptors and synaptic plasticity	7	0.36803364879074657	0.0593741	GRIA2, PRKCB, TSPAN7, AP2S1, AKAP5, CAMK2G, GRIA3	1011	31	11009	2.4588558118758175	1	0.5684821976044467	0.5530646192504889
GOTERM_CC_DIRECT	GO:0048471~perinuclear region of cytoplasm	73	3.838065194532071	0.0599915	IFITM3, PTPRR, ARF1, PRR7, PLEKHF1, TFRC, PTPRM, FASLG, TNFSF13B, CDC20, HERC5, TRMT112, LAMP3, KIF5A, CTLA4, RAC3, CTSB, KCNH2, ALG2, GTPBP4, SIRT2, MLF1, CKAP4, OAS2, MCM3, CHI3L1, S100A4, MAPRE3, NUPR1, PPIB, GAPDH, VAMP5, PDE9A, ARF5, PLEC, VPS4A, GDPD3, SLC5A1, PRDX5, RAB40B, FIGNL1, NPY, SPP1, MAP6, HMOX1, APOD, PSMF1, UBQLN4, GBP4, PACSIN1, SNCA, TMEM184A, UBE2I, SRD5A1, ST8SIA2, PDE2A, XR…	1642	754	20660	1.2181721844034414	1	1	0.9890230515916575
INTERPRO	IPR001007:von Willebrand factor, type C	8	0.4206098843322818	0.0600391	COL1A1, COL3A1, MUC19, MUC5B, THBS2, THBS1, MUC5AC, TECTA	1577	43	19129	2.2567430062969134	1	1	1
SMART	SM00349:KRAB	45	2.365930599369085	0.0601636	ZNF671, ZNF154, ZNF493, ZNF273, ZNF43, KRBOX4, ZFP14, ZKSCAN7, POM121C, ZNF429, ZNF84, ZNF548, ZNF404, ZNF568, ZNF225, ZNF665, ZNF585B, ZNF445, ZNF620, ZNF785, ZNF169, ZNF223, ZNF586, ZNF443, ZNF587B, ZNF585A, ZNF100, ZNF584, ZNF19, ZNF483, ZNF141, ZNF33A, ZNF419, ZNF814, ZNF418, ZNF439, ZNF337, ZNF436, ZNF776, ZNF655, ZNF577, ZNF552, ZNF431, ZNF233, ZNF211	842	428	10366	1.2943980731236262	0.9999999999348732	1	1
GOTERM_BP_DIRECT	GO:0033280~response to vitamin D	5	0.26288117770767616	0.0610125	CXCL10, PRKCB, SPP1, TRIM25, BMP7	1566	19	19462	3.270484640720576	1	1	0.9985723026718336
GOTERM_BP_DIRECT	GO:0019076~viral release from host cell	5	0.26288117770767616	0.0610125	VPS4A, CHMP3, TRIM25, VPS37B, PPIA	1566	19	19462	3.270484640720576	1	1	0.9985723026718336
GOTERM_BP_DIRECT	GO:0006796~phosphate-containing compound metabolic process	5	0.26288117770767616	0.0610125	PTPRB, INPP1, IMPA2, ACYP2, LHPP	1566	19	19462	3.270484640720576	1	1	0.9985723026718336
GOTERM_BP_DIRECT	GO:0032753~positive regulation of interleukin-4 production	6	0.31545741324921134	0.061129058134582345	SLC7A5, SYK, IRF4, PRKCQ, LGALS9, CD3E	1566	27	19462	2.7617425854973745	1	1	0.9985723026718336
GOTERM_BP_DIRECT	GO:0046716~muscle cell cellular homeostasis	6	0.31545741324921134	0.061129058134582345	CHRNA1, MSTN, LOX, PLG, ALDOA, SOD1	1566	27	19462	2.7617425854973745	1	1	0.9985723026718336
GOTERM_BP_DIRECT	GO:0072332~intrinsic apoptotic signaling pathway by p53 class mediator	6	0.31545741324921134	0.061129058134582345	PYCARD, E2F1, ZNF385B, PMAIP1, E2F2, PDK2	1566	27	19462	2.7617425854973745	1	1	0.9985723026718336
INTERPRO	IPR003959:ATPase, AAA-type, core	9	0.47318611987381703	0.0611946	RFC4, CLPB, ORC1, PSMC3, PSMC4, PSMC1, FIGNL1, VPS4A, ATAD3C	1577	52	19129	2.0994219794156384	1	1	1
KEGG_PATHWAY	hsa04066:HIF-1 signaling pathway	16	0.8412197686645636	0.061200818603813656	ANGPT1, TFRC, PRKCB, SLC2A1, ENO1, ENO4, RBX1, HK3, EIF4EBP1, HMOX1, ALDOC, ALDOA, GAPDH, CAMK2G, IL6R, PFKP	770	109	8586	1.6367925652329323	1	0.5607318245052115	0.5359206818279898
UP_KW_BIOLOGICAL_PROCESS	KW-0053~Apoptosis	59	3.1019978969505786	0.061334755264852193	HIP1, PLEKHF1, RTKN, FASLG, COMP, PYCARD, ING4, UXT, CASP7, MECOM, RASSF3, BCL7C, ZNF385B, HTATIP2, PHLDA3, ZBP1, SRGN, CSNK2A1, PRKCB, DCC, TRAF2, IFI27, DDIT4, CDIP1, TMEM219, CHMP3, BIRC5, CHI3L1, FAM32A, DNASE2, GAPDH, PPIA, NAIP, TNFRSF21, EI24, CDCA7, THBS1, DRAM1, MIEN1, NUAK2, E2F1, HMOX1, PMAIP1, BAK1, BUB1, MAP2K6, PRELID1, GADD45B, SIVA1, SULF1, BLCAP, PML, AIMP2, TPX2, STK17A, MT-RNR2…	980	551	11376	1.2429793696062816	0.9999247319474637	0.6305469655545026	0.6095287333693525
REACTOME_PATHWAY	R-HSA-69236~G1 Phase	9	0.47318611987381703	0.061996830697171296	PPP2CA, CDKN2C, CDK6, CCND2, CCNE2, CCNE1, CDK4, E2F1, E2F2	1011	47	11009	2.0851695182776693	1	0.587107	0.571184
REACTOME_PATHWAY	R-HSA-69231~Cyclin D associated events in G1	9	0.47318611987381703	0.061996830697171296	PPP2CA, CDKN2C, CDK6, CCND2, CCNE2, CCNE1, CDK4, E2F1, E2F2	1011	47	11009	2.0851695182776693	1	0.587107	0.571184
UP_KW_BIOLOGICAL_PROCESS	KW-0228~DNA excision	3	0.15772870662460567	0.0620794	POLD3, POLD4, POLD1	980	5	11376	6.9648979591836735	0.999933	0.6305469655545026	0.6095287333693525
GOTERM_CC_DIRECT	GO:0019897~extrinsic component of plasma membrane	7	0.36803364879074657	0.062142551408154584	USP8, STOML2, SYTL1, PLG, MYD88, S100A10, SYTL2	1642	36	20660	2.4465421572607933	1	1	0.9890230515916575
GOTERM_MF_DIRECT	GO:0008373~sialyltransferase activity	5	0.26288117770767616	0.0624789	ST6GAL1, ST8SIA1, ST8SIA2, ST8SIA6, ST6GALNAC5	1539	19	18976	3.2447590711671968	1	1	0.9993060374739764
GOTERM_CC_DIRECT	GO:0046540~U4/U6 x U5 tri-snRNP complex	8	0.4206098843322818	0.0628142	SART1, SNRPN, SNRPD1, RBM42, SNRNP27, SNRPA, LSM3, SNRPB	1642	45	20660	2.236838543781296	1	1	0.9890230515916575
GOTERM_MF_DIRECT	GO:0008320~protein transmembrane transporter activity	6	0.31545741324921134	0.0628378	SEC61A1, SEC61G, TOMM20L, TIMM17A, TIMM17B, TOMM40L	1539	27	18976	2.740018771207855	1	1	0.9993060374739764
SMART	SM00202:SR	6	0.31545741324921134	0.0629446	LGALS3BP, CD6, TMPRSS3, TMPRSS4, TMPRSS2, PRSS12	842	27	10366	2.735814198997097	0.9999999999787546	1	1
UP_KW_BIOLOGICAL_PROCESS	KW-0177~Collagen degradation	5	0.26288117770767616	0.0630547	MMP11, ADAM15, MMP1, MMP2, PEPD	980	18	11376	3.224489795918367	0.9999428342654801	0.6305469655545026	0.6095287333693525
UP_SEQ_FEATURE	MUTAGEN:S->A: Loss of activity.	4	0.2103049421661409	0.0631574	CAMK4, TMPRSS2, SLC5A1, PLA2G7	1627	12	20583	4.216963736939151	1	1	1
GOTERM_CC_DIRECT	GO:0000781~chromosome, telomeric region	21	1.1041009463722398	0.0634688	SUN2, ACD, FEN1, PCNA, ALYREF, ATRX, CBX1, XRCC3, LIG4, XRCC1, SIRT2, PML, SMG6, PPP1CB, ORC1, POLD1, MCM3, SPDYA, NABP2, MCM6, MCM2	1642	175	20660	1.5098660170523754	1	1	0.9890230515916575
REACTOME_PATHWAY	R-HSA-5621481~C-type lectin receptors (CLRs)	20	1.0515247108307046	0.0637953	SYK, MUC16, MUC19, ICAM2, MUC5B, MUC5AC, PYCARD, PSMD9, PSMA3, PSMB4, PSMC3, PSMD4, PSMC4, PSMA2, PSMB3, PSMC1, MUC12, PSME1, IKBKG, PSMF1	1011	143	11009	1.5229676357272794	1	0.5977553789370984	0.5815438943381119
REACTOME_PATHWAY	R-HSA-416993~Trafficking of GluR2-containing AMPA receptors	5	0.26288117770767616	0.0638112	GRIA2, PRKCB, TSPAN7, AP2S1, GRIA3	1011	17	11009	3.2027113516029555	1	0.5977553789370984	0.5815438943381119
GOTERM_CC_DIRECT	GO:0005765~lysosomal membrane	42	2.2082018927444795	0.064207	IFITM3, IFITM1, IFITM2, PLEKHF1, RAB5C, SLC44A2, SLC3A2, CLN3, LAPTM4B, LAPTM4A, DRAM1, BLOC1S1, LAMP3, SLC15A3, GPR155, B2M, AP1M1, STARD3, CD74, HLA-DRB5, CCZ1B, LAPTM5, CYB561A3, CP, SLC39A14, VASN, SLC7A5, SYT11, DNAJC5, TMBIM1, SPNS1, GNB4, CHMP3, CDIP1, KXD1, CHMP4A, TMEM9, CYB561, ARL8A, HLA-DRB1, ITM2C, CHMP5	1642	405	20660	1.304822483872423	1	1	0.9890230515916575
REACTOME_PATHWAY	R-HSA-212436~Generic Transcription Pathway	131	6.887486855941114	0.0648944	TACO1, YEATS4, COX6A1, UXT, PSMD9, CCND2, PSMD4, ZNF568, ZNF445, ZNF169, ZNF443, ZNF19, G6PD, CSNK2A1, PRKCB, LMO2, RUNX3, MED6, COX6B1, RBX1, AR, CCNE2, CCNE1, GPRIN1, DDIT4, ZNF439, PSME1, TXNIP, ZNF436, PRKCQ, MYL9, ZNF552, ZNF431, ZNF671, ZNF154, GRIA2, ZNF273, SUPT4H1, KRBOX4, ANAPC11, PRDX5, ZKSCAN7, ZNF429, PRDX1, ZNF548, PMAIP1, SFN, PSMF1, APOE, ZNF665, ZNF785, MAP2K6, CBX8, ZNF660, PREL…	1011	1251	11009	1.14028	1	0.6038462407501013	0.5874695683235261
GOTERM_CC_DIRECT	GO:1904115~axon cytoplasm	10	0.5257623554153523	0.065135	AP3M2, ARMCX3, BLOC1S5, UCHL1, HSBP1, BLOC1S1, KIF5A, TRIM46, ARL8A, SOD1	1642	64	20660	1.96597	1	1	0.9890230515916575
GOTERM_CC_DIRECT	GO:0071944~cell periphery	10	0.5257623554153523	0.065135	KRT19, KRT18, MUC12, ICAM2, CIB2, RAC3, INHBB, ATP1B2, ICAM5, ARHGEF5	1642	64	20660	1.96597	1	1	0.9890230515916575
KEGG_PATHWAY	hsa00480:Glutathione metabolism	10	0.5257623554153523	0.065139	GGCT, GCLC, G6PD, GPX1, IDH2, SMS, OPLAH, GSTT2B, PRDX6, SRM	770	57	8586	1.956254272043746	0.9999999998788721	0.5801258214560323	0.5544565373208097
REACTOME_PATHWAY	R-HSA-9707564~Cytoprotection by HMOX1	11	0.5783385909568874	0.0651582	TACO1, COX4I1, HM13, TXNIP, BLVRB, HMOX1, MAFK, COX5B, COX6A1, COX5A, COX6B1	1011	64	11009	1.8715844460929771	1	0.6038462407501013	0.5874695683235261
BIOCARTA	h_lymPathway:Adhesion and Diapedesis of Lymphocytes	5	0.26288117770767616	0.0654255	VCAM1, SELL, ICAM2, ITGAL, ICAM1	186	14	1623	3.1163594470046085	0.9999997555808604	1	1
BIOCARTA	h_ctlPathway:CTL mediated immune response against target cells	5	0.26288117770767616	0.0654255	FASLG, ITGAL, CD3E, B2M, ICAM1	186	14	1623	3.1163594470046085	0.9999997555808604	1	1
GOTERM_BP_DIRECT	GO:2000045~regulation of G1/S transition of mitotic cell cycle	9	0.47318611987381703	0.0655453	PPP2CA, CDKN2C, BCL7A, ID2, BCL7C, PSME1, E2F1, DPF3, ACTB	1566	54	19462	2.071306939123031	1	1	0.9985723026718336
INTERPRO	IPR020837:Fibrinogen, conserved site	5	0.26288117770767616	0.0656305	FGA, FCN2, TNXB, ANGPT1, ANGPTL4	1577	19	19129	3.192103594433134	1	1	1
GOTERM_BP_DIRECT	GO:0086009~membrane repolarization	4	0.2103049421661409	0.065965	KCNH2, KCND2, ATP1A2, ATP1B2	1566	12	19462	4.142613878246062	1	1	0.9985723026718336
GOTERM_BP_DIRECT	GO:0045060~negative thymic T cell selection	4	0.2103049421661409	0.065965	SPN, CD74, CCR7, CD3E	1566	12	19462	4.142613878246062	1	1	0.9985723026718336
GOTERM_BP_DIRECT	GO:0000727~double-strand break repair via break-induced replication	4	0.2103049421661409	0.065965	CDC45, MCM3, MCM6, MCM2	1566	12	19462	4.142613878246062	1	1	0.9985723026718336
GOTERM_BP_DIRECT	GO:0042542~response to hydrogen peroxide	8	0.4206098843322818	0.0662366	COL1A1, GPX1, MMP2, TXNIP, HMOX1, SDC1, BAK1, SOD1	1566	45	19462	2.20939	1	1	0.9985723026718336
UP_KW_MOLECULAR_FUNCTION	KW-0418~Kinase	71	3.732912723449001	0.0663316	LRGUK, MAST3, FLT4, ARAF, CIB2, HK3, RPS6KA3, RPS6KA6, GUK1, PLAU, PDK4, MAP3K8, TK1, IKBKG, MAP3K6, SEPHS2, IKBKE, PDK2, CDKL3, CSNK2A1, SYK, PRKCB, IPMK, MATK, MAPK8IP2, DCK, YWHAZ, HGS, LCK, AKAP9, CMPK2, PRKCQ, PRPS2, PFKFB2, PRKAA2, PKDCC, TTK, PRKX, MST1R, PKMYT1, AK9, PIK3R5, NUAK2, IRAK2, PMVK, GRK6, CAMK2G, BUB1, PACSIN1, MAP2K6, CDKN2C, CDC42BPG, GLYCTK, PLK1, GCK, UCKL1, UCK2, SNRK, CD…	909	766	11871	1.2104671302639403	0.9990239762618963	0.840542	0.840542
UP_KW_MOLECULAR_FUNCTION	KW-0121~Carboxypeptidase	7	0.36803364879074657	0.0665776	CTSA, SCPEP1, CPO, CPQ, VASH2, PRCP, CPVL	909	38	11871	2.4056800416883792	0.9990496160002771	0.840542	0.840542
GOTERM_MF_DIRECT	GO:0060090~binding, bridging	22	1.1566771819137749	0.066677	CBX1, TRAF2, AKAP5, USP18, LTBP1, PML, RBX1, AR, AIMP2, PLCB3, PRDX4, IFI27, PSMD4, LOX, TBC1D31, IRAK2, AKAP9, E2F1, TCAP, DLGAP3, MYD88, SNCA	1539	183	18976	1.4823052368829377	1	1	0.9993060374739764
KEGG_PATHWAY	hsa03260:Virion - Human immunodeficiency virus	3	0.15772870662460567	0.0667401	CD4, CXCR4, CCR5	770	5	8586	6.69039	1	0.5801258214560323	0.5544565373208097
GOTERM_BP_DIRECT	GO:0007165~signal transduction	121	6.361724500525763	0.0669606	CD83, RTKN, GMFG, IRS2, FGF2, CXCL16, PYCARD, RPS6KA3, RPS6KA6, FGF7, SYNGAP1, FGF9, RASSF3, PLAU, TNFRSF8, MAP3K6, CHRNB1, CSNK2A1, PRKCB, SIGIRR, AR, HGS, AKAP9, PDE9A, CHRNA1, GRIA2, LRRC59, RASL12, CRABP2, SH2D2A, CRABP1, DAPP1, MST1R, RASAL3, IQGAP3, CD79B, RACGAP1, GRK6, SFN, SRGAP2, FAM83D, PAG1, RHBDL1, S100A11, MAP2K6, PRPF38B, PDE2A, RASSF9, ARHGAP27, ARHGAP25, MFHAS1, CXCL10, CDK6, GKA…	1566	1310	19462	1.1479151433613135	1	1	0.9985723026718336
UP_SEQ_FEATURE	TOPO_DOM:Lumenal	65	3.4174553101997898	0.0671664	KDELR1, CCDC47, OGFOD3, ECE2, PIGV, CYP4Z1, SEC61A1, LAMP3, TMED2, TMEM38A, SEC61B, TMED7, GAL3ST2, TMEM38B, PSENEN, HS3ST3B1, CSGALNACT1, JAGN1, CHST6, TMED9, ST6GAL1, GLCE, RHBDF2, TMC8, MOGS, MANEAL, CYB561A3, POMGNT2, BET1L, SCAMP2, B3GNT7, SOAT1, SLC9A7, B3GNT3, KDELR2, SFT2D2, ST6GALNAC5, LRRC59, PMEL, RPN2, HM13, DERL1, TAPBPL, APH1A, FUT6, CLN3, PTDSS1, CHST11, ST8SIA6, SPTSSA, B4GALNT4, …	1627	672	20583	1.223672512951093	1	1	1
GOTERM_MF_DIRECT	GO:0016504~peptidase activator activity	4	0.2103049421661409	0.0672472	FN1, FBLN1, PRSS22, FBLN2	1539	12	18976	4.110028156811783	1	1	0.9993060374739764
REACTOME_PATHWAY	R-HSA-6811434~COPI-dependent Golgi-to-ER retrograde traffic	15	0.7886435331230284	0.0674415	TMED9, ARF1, KDELR1, KLC3, RACGAP1, KIF26A, KIFC1, TUBB1, KIF5A, TMED2, KDELR2, KIF2C, KIF20A, TMED7, ARF5	1011	99	11009	1.6498816053712198	1	0.6216818361233294	0.6048214516468167
REACTOME_PATHWAY	R-HSA-8939902~Regulation of RUNX2 expression and activity	12	0.6309148264984227	0.0680157	PSMD9, PSMA3, PSMB4, PSMC3, PSMD4, PSMA2, PSMC4, PSMB3, PSMC1, PSME1, PSMF1, RBX1	1011	73	11009	1.7900085362383644	1	0.6236574901279571	0.6067435247292186
UP_KW_BIOLOGICAL_PROCESS	KW-0249~Electron transport	16	0.8412197686645636	0.0680513	NDUFA9, NDUFA7, NDUFB7, NDUFB10, NDUFA5, NDUFA12, NDUFB3, NDUFA1, CYB561A3, UQCR10, UQCRH, HIGD2A, UQCRQ, NDUFS5, NDUFAB1, CYB561	980	115	11376	1.6150488021295475	0.9999743668002664	0.6379806970923261	0.6167146738559153
GOTERM_BP_DIRECT	GO:0030324~lung development	12	0.6309148264984227	0.0681327	COL3A1, MMP14, FGF7, FGF9, LOX, SLC23A1, WNT5A, CHI3L1, WNT2, LIPA, FGF2, YWHAZ	1566	83	19462	1.7967963809260026	1	1	0.9985723026718336
GOTERM_CC_DIRECT	GO:0005654~nucleoplasm	348	18.29652996845426	0.0690512	POP5, POP7, GORAB, PWWP2B, TONSL, UBE2L6, IKZF1, SLA2, LIPA, ACTB, RRP9, ZC3H12D, UXT, CDC20, RPS6KA3, PSMD9, PNN, RPS6KA6, PSMD4, SNRPD1, HOXA3, TRIM25, DPF3, CPNE3, UBASH3A, TRIM21, GTSE1, PDK2, TRIM22, SCN1A, STARD3, TSPYL1, CSNK2A1, PRKCB, KRT8, DNTTIP1, ACSL5, IMP4, MIF, RUNX3, GTPBP4, MED6, WDR77, AR, DDX39A, DDX39B, GRWD1, PSME1, KIF20A, HOXB7, VPS25, ASF1B, CRABP2, SUPT4H1, CDCA7, CDCA8, …	1642	4077	20660	1.073978771020821	1	1	0.9890230515916575
GOTERM_BP_DIRECT	GO:0045471~response to ethanol	15	0.7886435331230284	0.0692066	NQO1, G6PD, ST6GAL1, RGS19, VCAM1, MAOB, MSTN, PRKCB, SOD1, GPRIN1, CD27, CD14, BAK1, DMAP1, MYD88	1566	113	19462	1.6497134913369274	1	1	0.9985723026718336
GOTERM_CC_DIRECT	GO:0005795~Golgi stack	7	0.36803364879074657	0.0694101	CLIP3, CLN3, LYPLA2, MGAT4B, AKAP9, SULF1, GOLGA7	1642	37	20660	2.3804193962537448	1	1	0.9890230515916575
GOTERM_BP_DIRECT	GO:1902042~negative regulation of extrinsic apoptotic signaling pathway via death domain receptors	6	0.31545741324921134	0.0697007	FGA, ITPRIP, GPX1, TMBIM1, HMOX1, ICAM1	1566	28	19462	2.6631089217296116	1	1	0.9985723026718336
GOTERM_BP_DIRECT	GO:2000779~regulation of double-strand break repair	6	0.31545741324921134	0.0697007	MRGBP, VPS72, YEATS4, DMAP1, PML, ACTB	1566	28	19462	2.6631089217296116	1	1	0.9985723026718336
REACTOME_PATHWAY	R-HSA-9707587~Regulation of HMOX1 expression and activity	3	0.15772870662460567	0.0697214	HM13, HMOX1, MAFK	1011	5	11009	6.53353	1	0.6319077760330897	0.6147700579294803
REACTOME_PATHWAY	R-HSA-9754119~Drug-mediated inhibition of CDK4/CDK6 activity	3	0.15772870662460567	0.0697214	CDK6, CCND2, CDK4	1011	5	11009	6.53353	1	0.6319077760330897	0.6147700579294803
INTERPRO	IPR000836:Phosphoribosyltransferase domain	4	0.2103049421661409	0.0699857	PRPS2, PRTFDC1, APRT, UCKL1	1577	12	19129	4.043331219615303	1	1	1
REACTOME_PATHWAY	R-HSA-2871837~FCERI mediated NF-kB activation	13	0.6834910620399579	0.0700094	PSMD9, PSMA3, PSMB4, PSMC3, PSMD4, PSMC4, PSMA2, PSMB3, PSMC1, PSME1, PRKCQ, IKBKG, PSMF1	1011	82	11009	1.7263395334250078	1	0.6319077760330897	0.6147700579294803
GOTERM_BP_DIRECT	GO:0051592~response to calcium ion	9	0.47318611987381703	0.0715546	FGA, GDI1, TRPV6, PEF1, ALG2, TXNIP, SDC1, SLC25A12, THBS1	1566	55	19462	2.0336468129571577	1	1	0.9985723026718336
GOTERM_BP_DIRECT	GO:0060340~positive regulation of type I interferon-mediated signaling pathway	5	0.26288117770767616	0.0715996	ZBP1, WNT5A, IRF7, LSM14A, IKBKE	1566	20	19462	3.1069604086845466	1	1	0.9985723026718336
UP_KW_CELLULAR_COMPONENT	KW-0747~Spliceosome	19	0.9989484752891693	0.0720042	SF3B5, PRPF38B, PPIL1, SF3A2, ALYREF, CWC15, RNPC3, LSM3, PNN, SART1, DDX39B, SNRPD1, PPP1R8, ZMAT5, RALY, SREK1, SNRPA, CTNNBL1, SNRPB	1461	152	17831	1.5255817932922657	0.9887082603462355	0.39275013968501404	0.36002096137792955
REACTOME_PATHWAY	R-HSA-9013700~NOTCH4 Activation and Transmission of Signal to the Nucleus	4	0.2103049421661409	0.0726967	APH1A, PSENEN, APH1B, YWHAZ	1011	11	11009	3.9597158528909273	1	0.6462165288627957	0.6286907487955415
REACTOME_PATHWAY	R-HSA-73614~Pyrimidine salvage	4	0.2103049421661409	0.0726967	UCK2, TK1, DCK, UCKL1	1011	11	11009	3.9597158528909273	1	0.6462165288627957	0.6286907487955415
GOTERM_BP_DIRECT	GO:1901216~positive regulation of neuron death	7	0.36803364879074657	0.0727819	AIMP2, ST8SIA2, WNT5A, DDIT4, APOE, FCGR2B, SNCA	1566	37	19462	2.351213282247765	1	1	0.9985723026718336
GOTERM_BP_DIRECT	GO:0010811~positive regulation of cell-substrate adhesion	7	0.36803364879074657	0.0727819	NPY, SPOCK2, AGR2, COL8A1, DMP1, RELL2, FBLN2	1566	37	19462	2.351213282247765	1	1	0.9985723026718336
GOTERM_MF_DIRECT	GO:0002020~protease binding	15	0.7886435331230284	0.0728172	DERL1, FN1, PLG, MIF, THBS1, PANX1, PYCARD, COL1A1, COMP, COL3A1, COL1A2, SELL, TIMP2, ANXA9, TIMP4	1539	113	18976	1.636736876606462	1	1	0.9993060374739764
BIOCARTA	h_reckPathway:Inhibition of Matrix Metalloproteinases	4	0.2103049421661409	0.0728947	MMP14, MMP2, TIMP2, TIMP4	186	9	1623	3.8781362007168463	0.9999999598173058	1	1
BIOCARTA	h_bbcellPathway:Bystander B Cell Activation	4	0.2103049421661409	0.0728947	CD4, CD40, FASLG, HLA-DRB1	186	9	1623	3.8781362007168463	0.9999999598173058	1	1
GOTERM_BP_DIRECT	GO:0022617~extracellular matrix disassembly	8	0.4206098843322818	0.0729599	MMP11, MMP14, ADAM15, MMP15, MMP1, MMP2, ADAM8, PLG	1566	46	19462	2.161363762563163	1	1	0.9985723026718336
GOTERM_BP_DIRECT	GO:0006605~protein targeting	8	0.4206098843322818	0.0729599	NLGN1, SEC61G, TOMM20L, KATNB1, RASSF9, YWHAZ, PML, YWHAG	1566	46	19462	2.161363762563163	1	1	0.9985723026718336
REACTOME_PATHWAY	R-HSA-5696397~Gap-filling DNA repair synthesis and ligation in GG-NER	6	0.31545741324921134	0.0730862	POLD3, POLD4, RFC4, PCNA, POLD1, XRCC1	1011	25	11009	2.613412462908012	1	0.6462165288627957	0.6286907487955415
REACTOME_PATHWAY	R-HSA-977068~Termination of O-glycan biosynthesis	6	0.31545741324921134	0.0730862	ST6GAL1, MUC16, MUC19, MUC12, MUC5B, MUC5AC	1011	25	11009	2.613412462908012	1	0.6462165288627957	0.6286907487955415
UP_KW_PTM	KW-0558~Oxidation	8	0.4206098843322818	0.0731101	ACTA2, UCHL1, TRPA1, FN1, PTPN7, APOE, GAPDH, ACTB	1256	42	14201	2.153624507127692	0.9049675439178967	0.4679049444820791	0.4532829149670141
GOTERM_MF_DIRECT	GO:0004129~cytochrome-c oxidase activity	5	0.26288117770767616	0.0732849	COX4I1, COX5B, COX6A1, COX5A, COX6B1	1539	20	18976	3.0825211176088367	1	1	0.9993060374739764
GOTERM_CC_DIRECT	GO:1904724~tertiary granule lumen	9	0.47318611987381703	0.0736344	CNN2, CRISP3, TIMP2, GGH, ALDOC, ALDOA, LYZ, GOLGA7, B2M	1642	56	20660	2.022141987123717	1	1	0.9890230515916575
PIR_SUPERFAMILY	PIRSF005557:sialyltransferase	5	0.26288117770767616	0.0739266	ST6GAL1, ST8SIA1, ST8SIA2, ST8SIA6, ST6GALNAC5	184	16	1776	3.016304347826087	0.9999921160240602	1	1
GOTERM_BP_DIRECT	GO:0006006~glucose metabolic process	10	0.5257623554153523	0.0749477	HK3, G6PD, PDK4, IRS2, APOD, GALM, LIPA, GAPDH, GCK, PDK2	1566	65	19462	1.9119756361135671	1	1	0.9985723026718336
GOTERM_BP_DIRECT	GO:0032757~positive regulation of interleukin-8 production	10	0.5257623554153523	0.0749477	CD2, PYCARD, CD74, SYK, WNT5A, F2R, CHI3L1, CD14, LGALS9, MYD88	1566	65	19462	1.9119756361135671	1	1	0.9985723026718336
UP_SEQ_FEATURE	DOMAIN:G	3	0.15772870662460567	0.0755438	GTPBP8, ERAL1, GTPBP3	1627	6	20583	6.325445605408728	1	1	1
UP_SEQ_FEATURE	REGION:N-domain	3	0.15772870662460567	0.0755438	FEN1, ATP13A1, ERCC5	1627	6	20583	6.325445605408728	1	1	1
UP_SEQ_FEATURE	CARBOHYD:O-linked (Gal...) hydroxylysine; alternate	3	0.15772870662460567	0.0755438	COL1A1, COL3A1, COL1A2	1627	6	20583	6.325445605408728	1	1	1
UP_SEQ_FEATURE	PROPEP:N-terminal propeptide	3	0.15772870662460567	0.0755438	COL1A1, COL3A1, COL1A2	1627	6	20583	6.325445605408728	1	1	1
GOTERM_CC_DIRECT	GO:0005689~U12-type spliceosomal complex	6	0.31545741324921134	0.0756782	SF3B5, SNRPD1, ZMAT5, RBM41, RNPC3, SNRPB	1642	29	20660	2.603217270779957	1	1	0.9890230515916575
INTERPRO	IPR013806:Kringle-like fold	6	0.31545741324921134	0.0757405	PLAU, MMP2, FN1, PLG, KREMEN2, PRSS12	1577	28	19129	2.5992843554669807	1	1	1
INTERPRO	IPR017448:Speract/scavenger receptor-related	6	0.31545741324921134	0.0757405	LGALS3BP, CD6, TMPRSS3, TMPRSS4, TMPRSS2, PRSS12	1577	28	19129	2.5992843554669807	1	1	1
GOTERM_CC_DIRECT	GO:0034774~secretory granule lumen	15	0.7886435331230284	0.0759508	GMFG, ARPC5, MIF, APRT, PYCARD, HK3, COMMD9, PRDX4, PSMC3, PSMA2, COTL1, ALDOC, ALDOA, PPIA, S100A11	1642	116	20660	1.6270107942374732	1	1	0.9890230515916575
GOTERM_CC_DIRECT	GO:0014704~intercalated disc	8	0.4206098843322818	0.076054	TMEM65, JUP, GJA5, SLC2A1, ATP1A2, SCN2A, VAMP5, SCN1A	1642	47	20660	2.141653924896986	1	1	0.9890230515916575
GOTERM_CC_DIRECT	GO:0071742~IgE immunoglobulin complex	3	0.15772870662460567	0.0762812	IGLC7, IGLC6, IGLC3	1642	6	20660	6.291108404384897	1	1	0.9890230515916575
GOTERM_CC_DIRECT	GO:0071738~IgD immunoglobulin complex	3	0.15772870662460567	0.0762812	IGLC7, IGLC6, IGLC3	1642	6	20660	6.291108404384897	1	1	0.9890230515916575
REACTOME_PATHWAY	R-HSA-5083625~Defective GALNT3 causes HFTC	5	0.26288117770767616	0.0763203	MUC16, MUC19, MUC12, MUC5B, MUC5AC	1011	18	11009	3.0247829431805693	1	0.6634962515076298	0.6455018349924201
REACTOME_PATHWAY	R-HSA-5083636~Defective GALNT12 causes CRCS1	5	0.26288117770767616	0.0763203	MUC16, MUC19, MUC12, MUC5B, MUC5AC	1011	18	11009	3.0247829431805693	1	0.6634962515076298	0.6455018349924201
REACTOME_PATHWAY	R-HSA-2682334~EPH-Ephrin signaling	14	0.7360672975814931	0.0764448	PSENEN, SDC2, MMP2, CLTA, ARPC5, EFNA5, ACTB, MYL12B, APH1A, EFNA3, APH1B, CFL1, AP2S1, MYL9	1011	92	11009	1.6570550036554423	1	0.6634962515076298	0.6455018349924201
REACTOME_PATHWAY	R-HSA-4085001~Sialic acid metabolism	7	0.36803364879074657	0.076572	CTSA, ST6GAL1, GLB1, ST8SIA1, ST8SIA2, ST8SIA6, ST6GALNAC5	1011	33	11009	2.3098342475197073	1	0.6634962515076298	0.6455018349924201
GOTERM_BP_DIRECT	GO:0006935~chemotaxis	16	0.8412197686645636	0.0767634	CCL13, CXCL9, CMTM3, RARRES2, CXCR4, FGF2, CXCL16, SPN, CXCL10, CCL8, PLAU, CCL2, CCR8, CCR7, LGALS9, CCR5	1566	125	19462	1.590763729246488	1	1	0.9985723026718336
INTERPRO	IPR001675:Glycosyl transferase, family 29	5	0.26288117770767616	0.0769029	ST6GAL1, ST8SIA1, ST8SIA2, ST8SIA6, ST6GALNAC5	1577	20	19129	3.0324984147114775	1	1	1
INTERPRO	IPR002477:Peptidoglycan binding-like	5	0.26288117770767616	0.0769029	MMP14, MMP24, MMP15, MMP1, MMP2	1577	20	19129	3.0324984147114775	1	1	1
UP_SEQ_FEATURE	ZN_FING:C2H2-type 4	59	3.1019978969505786	0.0773172	ZNF491, GFI1, IKZF1, SALL2, MECOM, ZNF84, ZNF768, ZNF404, ZNF568, ZNF445, ZNF169, ZNF443, ZNF587B, ZNF19, ZNF483, ZFP3, OVOL1, ZSCAN22, ZNF439, ZSCAN23, ZNF436, ZNF431, ZNF397, ZNF232, ZNF671, ZNF154, ZNF273, GLIS2, ZFP14, ZKSCAN7, ZNF429, ZNF548, ZSCAN12, ZNF665, ZNF225, ZNF585B, ZNF620, ZNF785, ZNF345, ZNF586, ZNF223, ZNF585A, ZNF100, ZNF584, ZNF660, ZNF341, ZNF141, ZNF33A, ZNF419, WT1, ZFP62, …	1627	608	20583	1.2276358247339307	1	1	1
UP_SEQ_FEATURE	DOMAIN:VWFD 3	4	0.2103049421661409	0.0774399	MUC19, MUC5B, MUC5AC, TECTA	1627	13	20583	3.892581911020755	1	1	1
UP_SEQ_FEATURE	DOMAIN:VWFD 1	4	0.2103049421661409	0.0774399	MUC19, MUC5B, MUC5AC, TECTA	1627	13	20583	3.892581911020755	1	1	1
UP_SEQ_FEATURE	CROSSLNK:Glycyl lysine isopeptide (Gly-Lys) (interchain with K-? in acceptor proteins)	4	0.2103049421661409	0.0774399	SUMO3, URM1, NEDD8, ISG15	1627	13	20583	3.892581911020755	1	1	1
UP_SEQ_FEATURE	DOMAIN:VWFD 2	4	0.2103049421661409	0.0774399	MUC19, MUC5B, MUC5AC, TECTA	1627	13	20583	3.892581911020755	1	1	1
GOTERM_BP_DIRECT	GO:0060337~type I interferon signaling pathway	9	0.47318611987381703	0.0778879	IFITM3, IFITM1, IFITM2, IFI27, OAS2, IRF4, IRF7, IKBKE, MYD88	1566	56	19462	1.9973316912972086	1	1	0.9985723026718336
GOTERM_BP_DIRECT	GO:0051702~interaction with symbiont	3	0.15772870662460567	0.0779708	GPX1, FN1, PLG	1566	6	19462	6.213920817369093	1	1	0.9985723026718336
GOTERM_BP_DIRECT	GO:0001738~morphogenesis of a polarized epithelium	3	0.15772870662460567	0.0779708	AHI1, LAMA3, ACTB	1566	6	19462	6.213920817369093	1	1	0.9985723026718336
GOTERM_BP_DIRECT	GO:0032814~regulation of natural killer cell activation	3	0.15772870662460567	0.0779708	DCAF15, KLRD1, KLRC1	1566	6	19462	6.213920817369093	1	1	0.9985723026718336
GOTERM_BP_DIRECT	GO:1905691~lipid particle disassembly	3	0.15772870662460567	0.0779708	PRKAA2, PLIN3, PLIN2	1566	6	19462	6.213920817369093	1	1	0.9985723026718336
GOTERM_BP_DIRECT	GO:0060706~cell differentiation involved in embryonic placenta development	3	0.15772870662460567	0.0779708	EOMES, KRT19, KRT8	1566	6	19462	6.213920817369093	1	1	0.9985723026718336
GOTERM_BP_DIRECT	GO:0044085~cellular component biogenesis	3	0.15772870662460567	0.0779708	PSMC3, PSMC4, PSMC1	1566	6	19462	6.213920817369093	1	1	0.9985723026718336
GOTERM_BP_DIRECT	GO:0044546~NLRP3 inflammasome complex assembly	3	0.15772870662460567	0.0779708	PYCARD, AIM2, SIRT2	1566	6	19462	6.213920817369093	1	1	0.9985723026718336
GOTERM_CC_DIRECT	GO:0005687~U4 snRNP	4	0.2103049421661409	0.0784581	SNRPN, DDX39B, SNRPD1, SNRPB	1642	13	20660	3.871451325775321	1	1	0.9890230515916575
GOTERM_BP_DIRECT	GO:0050860~negative regulation of T cell receptor signaling pathway	6	0.31545741324921134	0.0788982	ELOF1, LAPTM5, PILRB, UBASH3A, THY1, SLA2	1566	29	19462	2.571277579601004	1	1	0.9985723026718336
GOTERM_MF_DIRECT	GO:0036402~proteasome-activating ATPase activity	3	0.15772870662460567	0.0790713	PSMC3, PSMC4, PSMC1	1539	6	18976	6.1650422352176735	1	1	0.9993060374739764
GOTERM_MF_DIRECT	GO:0003828~alpha-N-acetylneuraminate alpha-2,8-sialyltransferase activity	3	0.15772870662460567	0.0790713	ST8SIA1, ST8SIA2, ST8SIA6	1539	6	18976	6.1650422352176735	1	1	0.9993060374739764
GOTERM_MF_DIRECT	GO:0034711~inhibin binding	3	0.15772870662460567	0.0790713	IGSF1, INHBB, INHBA	1539	6	18976	6.1650422352176735	1	1	0.9993060374739764
KEGG_PATHWAY	hsa04060:Cytokine-cytokine receptor interaction	35	1.840168243953733	0.0796165	CCL13, CXCL9, CD40, MSTN, CXCR4, FASLG, TNFRSF13C, IL2RG, CXCL16, TNFSF13B, IL27RA, CCL8, IL18RAP, IL21R, CCL2, CCR8, TNFRSF8, CCR7, CCR5, IL6R, IL32, IL15RA, GDF15, BMP8A, INHBB, IFNLR1, INHBA, BMP7, IL17RC, CXCL10, CD4, IL2RB, CD27, RELL2, TNFRSF21	770	297	8586	1.3140495867768596	0.9999999999993898	0.6747501614613088	0.6448939596267377
GOTERM_BP_DIRECT	GO:0031145~anaphase-promoting complex-dependent catabolic process	8	0.4206098843322818	0.0800713	CDC20, PSMA3, PSMB4, PSMA2, UBE2C, UBE2S, PSMB3, ANAPC11	1566	47	19462	2.115377299529904	1	1	0.9985723026718336
GOTERM_BP_DIRECT	GO:0045494~photoreceptor cell maintenance	8	0.4206098843322818	0.0800713	BBS1, BBS12, ESRRB, SLC2A1, LCA5, CIB2, ATP1B2, BBS4	1566	47	19462	2.115377299529904	1	1	0.9985723026718336
GOTERM_CC_DIRECT	GO:0005839~proteasome core complex	5	0.26288117770767616	0.0801426	PSMA3, PSMB4, PSMA2, PSMB3, PSMF1	1642	21	20660	2.9957659068499503	1	1	0.9890230515916575
REACTOME_PATHWAY	R-HSA-5357801~Programmed Cell Death	27	1.4195583596214512	0.0805701	FASLG, UACA, PSMD9, CASP7, PSMB4, PSMD4, PSMB3, E2F1, PMAIP1, SFN, BAK1, PSMF1, CD14, YWHAG, DCC, TRAF2, YWHAZ, PSMA3, PSMC3, PSMC4, PSMA2, PSMC1, PSME1, CHMP3, PRKCQ, CHMP4A, PLEC	1011	213	11009	1.380323483930288	1	0.6946662435461978	0.6758264781413095
GOTERM_BP_DIRECT	GO:0050982~detection of mechanical stimulus	4	0.2103049421661409	0.0807993	JUP, PIEZO1, TCAP, ANO3	1566	13	19462	3.8239512722271343	1	1	0.9985723026718336
GOTERM_BP_DIRECT	GO:0010762~regulation of fibroblast migration	4	0.2103049421661409	0.0807993	GNA13, CLN3, SDC4, RCC2	1566	13	19462	3.8239512722271343	1	1	0.9985723026718336
GOTERM_BP_DIRECT	GO:0010463~mesenchymal cell proliferation	4	0.2103049421661409	0.0807993	FGF7, FGF9, WNT5A, WNT2	1566	13	19462	3.8239512722271343	1	1	0.9985723026718336
GOTERM_BP_DIRECT	GO:0023052~signaling	4	0.2103049421661409	0.0807993	DLGAP3, CCR5, DLGAP5, SPTBN2	1566	13	19462	3.8239512722271343	1	1	0.9985723026718336
GOTERM_BP_DIRECT	GO:0007616~long-term memory	7	0.36803364879074657	0.080832	RELN, CCND2, RGS14, CAMK4, RASGRF1, APOE, BTBD9	1566	38	19462	2.289339248504403	1	1	0.9985723026718336
GOTERM_BP_DIRECT	GO:0019228~neuronal action potential	7	0.36803364879074657	0.080832	CHRNA1, KCND2, GPR88, SCN2A, CACNA1H, SCN1A, SOD1	1566	38	19462	2.289339248504403	1	1	0.9985723026718336
GOTERM_BP_DIRECT	GO:0010498~proteasomal protein catabolic process	7	0.36803364879074657	0.080832	PSMA3, PSMB4, PSMA2, PSMB3, PMAIP1, TRIM21, FBXO44	1566	38	19462	2.289339248504403	1	1	0.9985723026718336
GOTERM_BP_DIRECT	GO:0070555~response to interleukin-1	7	0.36803364879074657	0.080832	GCLC, IRAK2, CD38, CHI3L1, LGALS9, MYD88, SNCA	1566	38	19462	2.289339248504403	1	1	0.9985723026718336
GOTERM_BP_DIRECT	GO:0000070~mitotic sister chromatid segregation	7	0.36803364879074657	0.080832	DSN1, KIFC1, PLK1, CDCA8, TUBG1, ZWINT, RAN	1566	38	19462	2.289339248504403	1	1	0.9985723026718336
GOTERM_BP_DIRECT	GO:0051216~cartilage development	10	0.5257623554153523	0.0809035	CSGALNACT1, BBS1, WNT5A, HOXA3, BMP8A, TRIP11, CHI3L1, SULF1, PITX1, BMP7	1566	66	19462	1.8830063082936648	1	1	0.9985723026718336
GOTERM_CC_DIRECT	GO:0000922~spindle pole	17	0.8937960042060988	0.0810944	RGS14, PLEKHG6, PLK1, VPS4A, KATNB1, FRY, PPP2CA, FAM110A, UXT, CDC20, TPX2, DSN1, PSRC1, HAUS8, PRC1, POC1A, IKBKG	1642	138	20660	1.5499832300658443	1	1	0.9890230515916575
SMART	SM00235:ZnMc	6	0.31545741324921134	0.081168	MMP11, MMP14, MMP24, MMP15, MMP1, MMP2	842	29	10366	2.5471373576869523	0.9999999999999873	1	1
INTERPRO	IPR018525:Mini-chromosome maintenance, conserved site	3	0.15772870662460567	0.0814043	MCM3, MCM6, MCM2	1577	6	19129	6.064996829422955	1	1	1
INTERPRO	IPR005937:26S proteasome subunit P45	3	0.15772870662460567	0.0814043	PSMC3, PSMC4, PSMC1	1577	6	19129	6.064996829422955	1	1	1
REACTOME_PATHWAY	R-HSA-70326~Glucose metabolism	14	0.7360672975814931	0.0817879	PFKFB2, SLC37A2, SLC37A1, PPP2R5D, ENO1, ENO4, GCK, PPP2CA, HK3, ALDOC, ALDOA, SLC25A12, GAPDH, PFKP	1011	93	11009	1.639237207917212	1	0.7016754874065418	0.6826456271018058
GOTERM_MF_DIRECT	GO:0031386~protein tag	4	0.2103049421661409	0.0823318	SUMO3, URM1, NEDD8, ISG15	1539	13	18976	3.7938721447493373	1	1	0.9993060374739764
REACTOME_PATHWAY	R-HSA-68877~Mitotic Prometaphase	26	1.3669821240799158	0.0823321	CDCA8, NCAPH, SKA2, PPP2CA, CDC20, CCNB2, DSN1, HAUS8, TUBB1, BUB1, YWHAG, CENPT, CSNK2A1, CEP152, RCC2, PLK1, HAUS3, PPP2R5D, HAUS5, TUBG1, ZWINT, CENPH, AKAP9, BIRC5, KIF2C, SPC24	1011	204	11009	1.387841585694614	1	0.7028650086664728	0.6838028878313174
GOTERM_MF_DIRECT	GO:0019894~kinesin binding	8	0.4206098843322818	0.0827395	KLC3, PRC1, KIF5A, MAPK8IP2, FAM83D, LRP8, ACTB, SNCA	1539	47	18976	2.0987377822017614	1	1	0.9993060374739764
GOTERM_BP_DIRECT	GO:2000647~negative regulation of stem cell proliferation	5	0.26288117770767616	0.083055	CDKN2C, FBLN1, SFN, OVOL1, FGF2	1566	21	19462	2.9590099130329017	1	1	0.9985723026718336
GOTERM_BP_DIRECT	GO:0030150~protein import into mitochondrial matrix	5	0.26288117770767616	0.083055	TOMM20L, TIMM17A, TIMM17B, ROMO1, TOMM40L	1566	21	19462	2.9590099130329017	1	1	0.9985723026718336
GOTERM_CC_DIRECT	GO:0005758~mitochondrial intermembrane space	12	0.6309148264984227	0.0831068	COA4, STOML2, PRELID1, NDUFB7, CLPB, BLOC1S1, NDUFS5, TIMM13, CHCHD10, TXNIP, CIAPIN1, SOD1	1642	87	20660	1.7354781805199715	1	1	0.9890230515916575
GOTERM_BP_DIRECT	GO:0006396~RNA processing	56	2.9442691903259726	0.0831296	SNORA14B, SNORD116-24, SNORD116-23, SNORD116-20, SNORD115-5, SNORD116-18, SNORD116-15, SNORD13, SNORD116-16, SNORA33, SNORD90, SNORD62A, SNORD115-21, SNORD115-20, SNORD115-22, SNORA2B, MRPL44, SNHG12, SNORD116-26, SNORD116-25, SNORD104, SNORD46, SNORA28, SNORD116-27, SNORA74A, SNORD89, SNORA68, SNORA65, SNORA66, SNORA22, SNORA64, SNORA62, SNORD116-6, SNORA60, SNORD116-8, SNORA36B, SNORD3C, SNORD1…	1566	566	19462	1.229609773048301	1	1	0.9985723026718336
UP_SEQ_FEATURE	DOMAIN:Fibronectin type-III	21	1.1041009463722398	0.0832546	TNXB, MYBPC2, DCC, FN1, PTPRM, IFNLR1, IL2RG, POMGNT2, MID1, VASN, IL27RA, TRIM9, PTPRB, NPHS1, FNDC1, IL2RB, TRIM46, IL21R, VWA1, IL6R, CDON	1627	182	20583	1.4597182166327833	1	1	1
GOTERM_BP_DIRECT	GO:0016485~protein processing	12	0.6309148264984227	0.0833218	SRGN, APH1A, PSENEN, COMP, CLN3, F7, SPON1, MMP14, CASP7, APH1B, TMPRSS4, ECE2	1566	86	19462	1.7341174374053283	1	1	0.9985723026718336
SMART	SM00214:VWC	7	0.36803364879074657	0.0834148	COL1A1, COL3A1, MUC19, MUC5B, THBS2, THBS1, MUC5AC	842	38	10366	2.2678459807475937	1	1	1
INTERPRO	IPR024079:Metallopeptidase, catalytic domain	12	0.6309148264984227	0.0834377	MMP11, ADAM29, MMP14, MMP24, ADAM15, MMP15, MMP1, MMP2, ADAM8, ADAM20, ECE2, ADAMTS20	1577	84	19129	1.732856236977987	1	1	1
REACTOME_PATHWAY	R-HSA-110373~Resolution of AP sites via the multiple-nucleotide patch replacement pathway	6	0.31545741324921134	0.083969	POLD3, POLD4, FEN1, RFC4, PCNA, POLD1	1011	26	11009	2.5128965989500114	1	0.7133245578209801	0.6939787677358181
GOTERM_CC_DIRECT	GO:0070469~respiratory chain	6	0.31545741324921134	0.0851548	NDUFB10, NDUFA12, NDUFS5, NDUFB3, NDUFA1, HIGD2A	1642	30	20660	2.5164433617539586	1	1	0.9890230515916575
INTERPRO	IPR006026:Peptidase, metallopeptidase	6	0.31545741324921134	0.0856032	MMP11, MMP14, MMP24, MMP15, MMP1, MMP2	1577	29	19129	2.509653860450878	1	1	1
INTERPRO	IPR027417:P-loop containing nucleoside triphosphate hydrolase	88	4.6267087276550996	0.0860658	LRGUK, ARF1, DDX49, ACAA2, CLPB, DIRAS1, DQX1, RAB3D, N4BP2L1, SMG9, N4BP2L2, SULT1C2, MTG1, GUK1, KIF5A, RAC3, TK1, GAL3ST2, HS3ST3B1, TOR3A, CHST6, RFC4, ATRX, GTPBP8, RHOF, DCK, GTPBP4, ATAD3C, GTPBP3, ARL4C, RAB32, CACNB2, AGAP9, RAP2B, MRAS, DDX39A, DDX39B, KIFC1, MCM3, CMPK2, KIF2C, KIF20A, MCM6, KIFC3, NAIP, ARL8A, ARF5, MCM2, PFKFB2, DDX28, RASL12, RAB5C, DNAH7, VPS4A, DNAH6, DNAH9, NUGGC…	1577	914	19129	1.1678768511799125	1	1	1
REACTOME_PATHWAY	R-HSA-202433~Generation of second messenger molecules	7	0.36803364879074657	0.0861199	ENAH, HLA-DRB5, CD4, LCK, CD3E, HLA-DRB1, CD101	1011	34	11009	2.241897946122069	1	0.7244937942735745	0.704845
REACTOME_PATHWAY	R-HSA-5579029~Metabolic disorders of biological oxidation enzymes	7	0.36803364879074657	0.0861199	CYP27A1, GCLC, SLC35D1, CYP21A2, CYP11A1, MAT1A, OPLAH	1011	34	11009	2.241897946122069	1	0.7244937942735745	0.704845
UP_KW_MOLECULAR_FUNCTION	KW-0255~Endonuclease	12	0.6309148264984227	0.086479	ZC3H12D, FEN1, RNASEH2A, NOB1, SLX1B, PPP1R8, APEX2, DNASE2, ERCC5, RNASE1, MRPL44, SMG6	909	91	11871	1.7221194646937221	0.9998922117279279	0.8825997997966489	0.8825997997966489
REACTOME_PATHWAY	R-HSA-76002~Platelet activation, signaling and aggregation	32	1.6824395373291272	0.0874773	LGALS3BP, SPARC, PLG, THBS1, PIK3R5, GNA13, CYB5R1, ISLR, CFL1, PHACTR2, SRGN, FGA, SYK, PRKCB, RARRES2, F2R, FN1, ADRA2C, YWHAZ, SOD1, COL1A1, F8, COL1A2, LCK, GNB4, SERPING1, CD9, PRKCQ, TAGLN2, ALDOA, GAS6, PPIA	1011	263	11009	1.3249239355680669	1	0.7323580681898295	0.7124960778811613
REACTOME_PATHWAY	R-HSA-1169410~Antiviral mechanism by IFN-stimulated genes	20	1.0515247108307046	0.0880305	UBE2I, FANCM, UBA7, MX2, MX1, FANCA, ISG15, UBE2L6, USP18, OASL, DUS2, PPP2CA, HERC5, OAS2, OAS3, TUBB1, TRIM25, IKBKG, MAP2K6, SNCA	1011	149	11009	1.461640079926181	1	0.7330018785123897	0.7131224276814131
KEGG_PATHWAY	hsa04144:Endocytosis	30	1.5772870662460567	0.0882335	ARF1, RAB5C, TFRC, ZFYVE9, VPS4A, CXCR4, CLTA, IL2RG, PSD3, KIF5A, GRK6, AP2S1, CCR5, USP8, HLA-C, VPS37B, ARPC5, ARAP1, PML, AGAP9, ACAP1, HGS, IL2RB, CHMP3, CHMP4A, STAMBP, VPS25, VPS28, ARF5, CHMP5	770	250	8586	1.338077922077922	0.9999999999999748	0.71397	0.6823783665896929
SMART	SM00355:ZnF_C2H2	74	3.890641430073607	0.088404	ZNF493, ZNF491, GFI1, ZNF43, IKZF1, SALL2, MECOM, ZNF84, ZNF768, DPF3, ZNF385B, ZNF404, ZNF568, ZNF445, ZNF169, ZNF367, ZNF443, ZNF587B, KLF10, ZNF19, ZNF483, ZFP3, OVOL1, KLF15, ZSCAN22, ZNF439, ZSCAN23, ZNF436, ZNF598, ZNF552, ZNF431, ZNF233, ZNF397, ZNF232, ZNF671, ZNF154, ZBTB8A, ZNF273, GLIS2, ZFP14, ZMAT1, ZKSCAN7, ZNF429, ZNF548, ZSCAN12, ZNF665, ZNF225, ZNF585B, ZNF620, ZNF785, ZNF345, ZN…	842	771	10366	1.181616249372287	0.9999999999999993	1	1
GOTERM_BP_DIRECT	GO:0030199~collagen fibril organization	11	0.5783385909568874	0.0884327	GREM1, COL1A1, COL28A1, COMP, MMP11, COL3A1, TNXB, COL1A2, LOX, SERPINH1, COL4A5	1566	77	19462	1.775405947819741	1	1	0.9985723026718336
GOTERM_BP_DIRECT	GO:0043406~positive regulation of MAP kinase activity	11	0.5783385909568874	0.0884327	CD40, NEK10, ADAM8, PDE5A, MST1R, MIF, TPD52L1, THBS1, FGF2, MAP2K6, PIK3R5	1566	77	19462	1.775405947819741	1	1	0.9985723026718336
KEGG_PATHWAY	hsa01200:Carbon metabolism	16	0.8412197686645636	0.0884565	PRPS2, G6PD, SDS, SHMT2, GLYCTK, IDH2, ENO1, ENO4, GCK, HK3, ALDOC, PHGDH, PGLS, ALDOA, GAPDH, PFKP	770	115	8586	1.5513946922642574	0.9999999999999768	0.71397	0.6823783665896929
GOTERM_BP_DIRECT	GO:0001656~metanephros development	6	0.31545741324921134	0.0887109	APH1A, EYA1, RDH10, ID3, BMP7, HOXA11	1566	30	19462	2.485568326947637	1	1	0.9985723026718336
GOTERM_BP_DIRECT	GO:0010800~positive regulation of peptidyl-threonine phosphorylation	6	0.31545741324921134	0.0887109	WNT5A, PLK1, CHI3L1, S1PR2, BMP7, STOX1	1566	30	19462	2.485568326947637	1	1	0.9985723026718336
GOTERM_MF_DIRECT	GO:0008201~heparin binding	21	1.1041009463722398	0.0889873	TMEM184A, COL28A1, PLA2G2D, TNXB, MSTN, COL23A1, FN1, PRELP, THBS2, FGF2, BMP7, THBS1, COMP, CXCL10, FGF7, CCL8, SELL, FGF9, GPNMB, RSPO1, APOE	1539	179	18976	1.4465462227885044	1	1	0.9993060374739764
INTERPRO	IPR006073:GTP binding domain	5	0.26288117770767616	0.0890735	MTG1, GTPBP8, ERAL1, GTPBP4, GTPBP3	1577	21	19129	2.8880937282966452	1	1	1
REACTOME_PATHWAY	R-HSA-5663220~RHO GTPases Activate Formins	19	0.9989484752891693	0.0893539	CENPT, RCC2, PLK1, CDCA8, PPP2R5D, ZWINT, ACTB, SKA2, PPP2CA, CDC20, DSN1, FMNL1, CENPH, TUBB1, BIRC5, KIF2C, SRGAP2, BUB1, SPC24	1011	140	11009	1.4778225236682212	1	0.7330018785123897	0.7131224276814131
GOTERM_BP_DIRECT	GO:0008643~carbohydrate transport	7	0.36803364879074657	0.0893577	SLC37A2, SLC37A1, SLC35D1, SLC35B1, SLC35C1, SLC2A1, SLC50A1	1566	39	19462	2.230638242132495	1	1	0.9985723026718336
REACTOME_PATHWAY	R-HSA-9694614~Attachment and Entry	5	0.26288117770767616	0.0899573	SDC4, SDC2, TMPRSS2, SDC1, GPC4	1011	19	11009	2.8655838409079077	1	0.7330018785123897	0.7131224276814131
REACTOME_PATHWAY	R-HSA-202430~Translocation of ZAP-70 to Immunological synapse	5	0.26288117770767616	0.0899573	HLA-DRB5, CD4, LCK, CD3E, HLA-DRB1	1011	19	11009	2.8655838409079077	1	0.7330018785123897	0.7131224276814131
REACTOME_PATHWAY	R-HSA-3000480~Scavenging by Class A Receptors	5	0.26288117770767616	0.0899573	COL1A1, COL3A1, COL1A2, APOE, FTL	1011	19	11009	2.8655838409079077	1	0.7330018785123897	0.7131224276814131
REACTOME_PATHWAY	R-HSA-4755510~SUMOylation of immune response proteins	4	0.2103049421661409	0.0905497	UBE2I, SUMO3, IKBKG, IKBKE	1011	12	11009	3.629739531816683	1	0.7330018785123897	0.7131224276814131
REACTOME_PATHWAY	R-HSA-176974~Unwinding of DNA	4	0.2103049421661409	0.0905497	CDC45, MCM3, MCM6, MCM2	1011	12	11009	3.629739531816683	1	0.7330018785123897	0.7131224276814131
UP_KW_MOLECULAR_FUNCTION	KW-0687~Ribonucleoprotein	32	1.6824395373291272	0.0908459	MRPS35, MRPS14, MRPL16, MRPL17, MRPL36, MRPL13, RRP9, RPS6KA3, SNRPD1, PCBP1, RALY, RPS2, MRPL9, TRIM21, MRPS28, RPL39L, SNRPN, MRPS21, IMP4, MRPL48, MRPL24, LSM3, MRPL22, MRPL44, MRPL51, FAU, SNRPC, LSM14A, RPS21, NOP10, SNRPA, SNRPB	909	316	11871	1.3224714876550945	0.9999335664091022	0.8825997997966489	0.8825997997966489
REACTOME_PATHWAY	R-HSA-180786~Extension of Telomeres	9	0.47318611987381703	0.0913609	POLD3, POLD4, POLA2, ACD, FEN1, RFC4, PCNA, POLD1, NOP10	1011	51	11009	1.9216268109617736	1	0.7330018785123897	0.7131224276814131
REACTOME_PATHWAY	R-HSA-3928665~EPH-ephrin mediated repulsion of cells	9	0.47318611987381703	0.0913609	APH1A, PSENEN, EFNA3, APH1B, MMP2, AP2S1, CLTA, EFNA5, ACTB	1011	51	11009	1.9216268109617736	1	0.7330018785123897	0.7131224276814131
UP_SEQ_FEATURE	DOMAIN:AGC-kinase C-terminal	9	0.47318611987381703	0.0914238	RPS6KA3, RPS6KA6, MAST3, PRKCB, CDC42BPG, GRK6, PRKCQ, PRKX, PKN1	1627	59	20583	1.9297969643619846	1	1	1
UP_SEQ_FEATURE	ZN_FING:C2H2-type 18	11	0.5783385909568874	0.0922927	ZNF493, ZFP62, ZNF429, ZNF84, ZNF814, ZNF43, ZNF337, ZNF585B, ZNF665, ZNF443, ZNF585A	1627	79	20583	1.7615164977087596	1	1	1
GOTERM_CC_DIRECT	GO:0000776~kinetochore	19	0.9989484752891693	0.0925441	CENPT, CDT1, PLK1, TTK, REC8, ZWINT, ACTB, SKA2, CDC20, DSN1, CENPH, SUMO3, CHMP3, BIRC5, CHMP4A, KIF2C, BUB1, SPC24, CHMP5	1642	162	20660	1.4756920948557166	1	1	0.9890230515916575
GOTERM_MF_DIRECT	GO:0001540~beta-amyloid binding	12	0.6309148264984227	0.0926407	GRIA2, CD74, NLGN1, GPRIN1, PFDN2, APOE, DLGAP3, FCGR2B, MAPK8IP2, LRP8, GRIA3, ITM2C	1539	87	18976	1.7007013062669443	1	1	0.9993060374739764
GOTERM_MF_DIRECT	GO:0000287~magnesium ion binding	26	1.3669821240799158	0.0945805	PRPS2, ARF1, FEN1, MAST3, CIB2, ATP10A, ENO1, ENO4, RPS6KA3, RPS6KA6, NUAK2, FIGNL1, MAP3K8, MAP3K6, SNCA, CDC42BPG, PDE2A, IDH2, PLK1, SNRK, GCLC, ILVBL, FARSA, DCTPP1, RAN, PRTFDC1	1539	234	18976	1.3700093856039275	1	1	0.9993060374739764
INTERPRO	IPR001909:Krueppel-associated box	45	2.365930599369085	0.0946618	ZNF671, ZNF154, ZNF493, ZNF273, ZNF43, KRBOX4, ZFP14, ZKSCAN7, POM121C, ZNF429, ZNF84, ZNF548, ZNF404, ZNF568, ZNF225, ZNF665, ZNF585B, ZNF445, ZNF620, ZNF785, ZNF169, ZNF223, ZNF586, ZNF443, ZNF587B, ZNF585A, ZNF100, ZNF584, ZNF19, ZNF483, ZNF141, ZNF33A, ZNF419, ZNF814, ZNF418, ZNF439, ZNF337, ZNF436, ZNF776, ZNF655, ZNF577, ZNF552, ZNF431, ZNF233, ZNF211	1577	436	19129	1.2519488868074906	1	1	1
REACTOME_PATHWAY	R-HSA-9824446~Viral Infection Pathways	82	4.311251314405888	0.0952341	FEN1, ARF1, CLTA, PYCARD, PSMD9, PSMD4, SNRPD1, TUBB1, TRIM25, NELFB, IKBKG, CCR5, IKBKE, GOLGA7, B2M, IL6R, YWHAG, ZBP1, ST6GAL1, SYK, PRMT1, ANO8, ANO9, LIG4, HLA-C, MOGS, ATP1B2, VPS37B, IL17RC, YWHAZ, ANO3, RBX1, PSMA3, PSMA2, LCK, IRF7, PSME1, CHMP3, CHMP4A, SLC25A5, PPIB, VPS25, PPIA, VPS28, CHMP5, SNRPB, RPN2, SDC4, SDC2, VPS4A, SUPT4H1, CXCR4, TMPRSS2, ATP1A2, CD79B, PSMB4, PSMB3, IRAK2, …	1011	767	11009	1.1641667859542426	1	0.7604013277988242	0.739779
GOTERM_BP_DIRECT	GO:0071985~multivesicular body sorting pathway	5	0.26288117770767616	0.0953465	VPS4A, CHMP3, CHMP4A, VPS25, CHMP5	1566	22	19462	2.824509462440497	1	1	0.9985723026718336
GOTERM_BP_DIRECT	GO:0016125~sterol metabolic process	5	0.26288117770767616	0.0953465	CYP39A1, CYP27A1, CYP21A2, CYP11A1, LIPA	1566	22	19462	2.824509462440497	1	1	0.9985723026718336
GOTERM_CC_DIRECT	GO:0031902~late endosome membrane	18	0.9463722397476341	0.0954741	IFITM3, STARD3, HLA-DRB5, IFITM2, STOML1, VPS4A, CYB561A3, VPS37B, SLC39A14, FIG4, CLN3, LAPTM4B, LAPTM4A, LAMP3, B2M, HLA-DRB1, ARL8A, VPS28	1642	152	20660	1.489999358933265	1	1	0.9890230515916575
REACTOME_PATHWAY	R-HSA-1538133~G0 and Early G1	6	0.31545741324921134	0.0956535	PCNA, LIN37, CCNE2, CCNE1, E2F1, MYBL2	1011	27	11009	2.419826354544455	1	0.7604013277988242	0.739779
BIOCARTA	h_tcapoptosisPathway:HIV Induced T Cell Apoptosis	4	0.2103049421661409	0.0956763	CD4, FASLG, CCR5, CD3E	186	10	1623	3.4903225806451617	0.9999999998511032	1	1
BIOCARTA	h_il2Pathway:IL 2 signaling pathway	6	0.31545741324921134	0.0959558	STAT5A, CSNK2A1, SYK, LCK, IL2RB, IL2RG	186	22	1623	2.379765395894428	0.9999999998611083	1	1
REACTOME_PATHWAY	R-HSA-9615710~Late endosomal microautophagy	7	0.36803364879074657	0.0962899	PLIN3, CHMP3, CHMP4A, PLIN2, VPS37B, RNASE1, VPS28	1011	35	11009	2.17784	1	0.7619651664721401	0.7413002138903797
GOTERM_CC_DIRECT	GO:0034451~centriolar satellite	16	0.8412197686645636	0.096565	BBS1, G6PD, NAA40, CCDC14, CDC42BPG, PLK1, MID1, PIK3R5, KRT18, MIEN1, TBC1D31, FRMD8, PRKCQ, BBS4, DLGAP5, ZNF365	1642	131	20660	1.5367593048879136	1	1	0.9890230515916575
GOTERM_BP_DIRECT	GO:0046761~viral budding from plasma membrane	4	0.2103049421661409	0.0969228	VPS4A, CHMP3, CHMP4A, CHMP5	1566	14	19462	3.550811895639482	1	1	0.9985723026718336
GOTERM_BP_DIRECT	GO:0045842~positive regulation of mitotic metaphase/anaphase transition	4	0.2103049421661409	0.0969228	CDC20, UBE2C, DLGAP5, ANAPC11	1566	14	19462	3.550811895639482	1	1	0.9985723026718336
GOTERM_BP_DIRECT	GO:0042987~amyloid precursor protein catabolic process	4	0.2103049421661409	0.0969228	APH1A, PSENEN, CLN3, APH1B	1566	14	19462	3.550811895639482	1	1	0.9985723026718336
GOTERM_BP_DIRECT	GO:0019430~removal of superoxide radicals	4	0.2103049421661409	0.0969228	NQO1, CCS, PRDX1, SOD1	1566	14	19462	3.550811895639482	1	1	0.9985723026718336
REACTOME_PATHWAY	R-HSA-9793380~Formation of paraxial mesoderm	11	0.5783385909568874	0.0974838	PSMD9, PSMA3, PSMB4, PSMC3, PSMD4, PSMA2, PSMC4, PSMB3, PSMC1, PSME1, PSMF1	1011	69	11009	1.735962384781892	1	0.7675300755822084	0.7467141993257953
GOTERM_MF_DIRECT	GO:0070182~DNA polymerase binding	5	0.26288117770767616	0.0974975	CDT1, ACD, PCNA, NABP2, SMG6	1539	22	18976	2.802291925098942	1	1	0.9993060374739764
BBID	84.Ubiquitination_Pathways_Cell_Cycle	5	0.26288117770767616	0.0975992	CDC20, PLK1, E2F1, PDIA6, RBX1	61	12	388	2.6502732240437155	0.9993851624071821	1	1
GOTERM_BP_DIRECT	GO:0045214~sarcomere organization	7	0.36803364879074657	0.0983524	KRT19, KRT8, TCAP, MYOZ1, MYOZ2, MYPN, PLEC	1566	40	19462	2.1748722860791827	1	1	0.9985723026718336
REACTOME_PATHWAY	R-HSA-8949275~RUNX3 Regulates Immune Response and Cell Migration	3	0.15772870662460567	0.0983535	SPP1, ITGAL, RUNX3	1011	6	11009	5.444609297725025	1	0.7675300755822084	0.7467141993257953
REACTOME_PATHWAY	R-HSA-5619084~ABC transporter disorders	12	0.6309148264984227	0.0987645	PSMD9, PSMA3, PSMB4, PSMC3, PSMD4, PSMA2, PSMC4, PSMB3, PSMC1, DERL1, PSME1, PSMF1	1011	78	11009	1.6752643993000076	1	0.7675300755822084	0.7467141993257953
GOTERM_BP_DIRECT	GO:1901215~negative regulation of neuron death	9	0.47318611987381703	0.098827	GPNMB, MT-RNR2, NPY, PSMC1, TRAF2, CHMP4A, IKBKG, APOE, SNCA	1566	59	19462	1.8957724527566724	1	1	0.9985723026718336
REACTOME_PATHWAY	R-HSA-9678108~SARS-CoV-1 Infection	19	0.9989484752891693	0.0990239	ST6GAL1, UBE2I, TMPRSS2, MOGS, YWHAZ, BST2, PYCARD, IRAK2, CHMP3, TRIM25, CHMP4A, SFN, RPS2, FAU, PPIB, PPIA, IKBKE, RPS21, YWHAG	1011	142	11009	1.4570081219264153	1	0.7675300755822084	0.7467141993257953
GOTERM_BP_DIRECT	GO:0006812~cation transport	6	0.31545741324921134	0.0991242	PANX1, CHRNA1, CHRNB1, GPRIN1, PIEZO1, SLC39A1	1566	31	19462	2.4053887034977133	1	1	0.9985723026718336
GOTERM_BP_DIRECT	GO:0007588~excretion	6	0.31545741324921134	0.0991242	KCNK5, NPHS1, SCNN1B, CLCNKA, HMOX1, SLC26A3	1566	31	19462	2.4053887034977133	1	1	0.9985723026718336
GOTERM_BP_DIRECT	GO:0043162~ubiquitin-dependent protein catabolic process via the multivesicular body sorting pathway	6	0.31545741324921134	0.0991242	VPS4A, CHMP3, CHMP4A, VPS37B, VPS28, CHMP5	1566	31	19462	2.4053887034977133	1	1	0.9985723026718336
REACTOME_PATHWAY	R-HSA-9692914~SARS-CoV-1-host interactions	14	0.7360672975814931	0.0992076	UBE2I, YWHAZ, BST2, PYCARD, IRAK2, TRIM25, SFN, RPS2, FAU, PPIB, PPIA, IKBKE, RPS21, YWHAG	1011	96	11009	1.5880110451697989	1	0.7675300755822084	0.7467141993257953
BIOCARTA	h_EfpPathway:Estrogen-responsive protein Efp controls cell cycle and breast tumors growth	5	0.26288117770767616	0.0994546	CCNB2, CDK6, CDK4, TRIM25, SFN	186	16	1623	2.726814516129032	0.9999999999419552	1	1

## Sheet: S2
Supplementary table 2: Clinical-pathologic characteristics of the MBC series analyzed
	N	%
germline PV status
positive	41	33.3
negative	82	66.7
Behaviour
In situ	5	4.1
Invasive	118	95.9
Tumor histotype
Ductal carcinoma	118	95.9
Other	5	4.1
Grade
1	10	8.7
2	52	45.2
3	53	46.1
Lymph node status
Negative	55	50
Positive	55	50
ER status
Negative	5	4.3
Positive	110	95.7
PR status
Negative	10	8.8
Positive	104	91.2
HER2 status
Negative	92	87.6
Positive	13	12.4
Ki67
Low	38	41.3
High	54	58.7
AR
Negative	5	7.2
Positive	64	92.8
TILs
<50%	42	68.9
>50%	19	31.1
Intrinsic subtypes (PAM50)
Luminal A	37	30.1
Luminal B	58	47.1
HER2-enriched	15	12.2
Basal	8	6.5
Normal-like	5	4.1

## Sheet: S3
Supplementary table 3: Multivariate Cox regression analysis
	HR	95% CI	p-value
gene gPV	1.34	0.94-1.92	0.1
grade	2.36	0.54-10.36	0.26
Age	1.41	0.72-2.77	0.32
NKcells_MCP	0.89	0.80-0.98	0.024
Nkcells_activated	8.14e-06	2.16e-10-0.31	0.029
Monocytes_MCP	1	0.99-1.00	0.79
