# Supplementary material for: Transcriptomic Deconvolution Reveals Prognostic Immune Signatures and Immunotherapy-Responsive Subtypes in Male Breast Cancer
Source: Research Square preprint supplement (doi:10.21203/rs.3.rs-7572724/v1), 2025-10-27
Supplement: Supplementary file 2 [file 9133a9a48f4c3fe1da62131a.docx]

**Supplementary Figure 1:** Correlation matrix graph showing positive correlations between results from CIBERSORTx absolute score (ABS) and MCP-counter for all cell types evaluated. The circle size is inversely correlated with the magnitude of p-values.


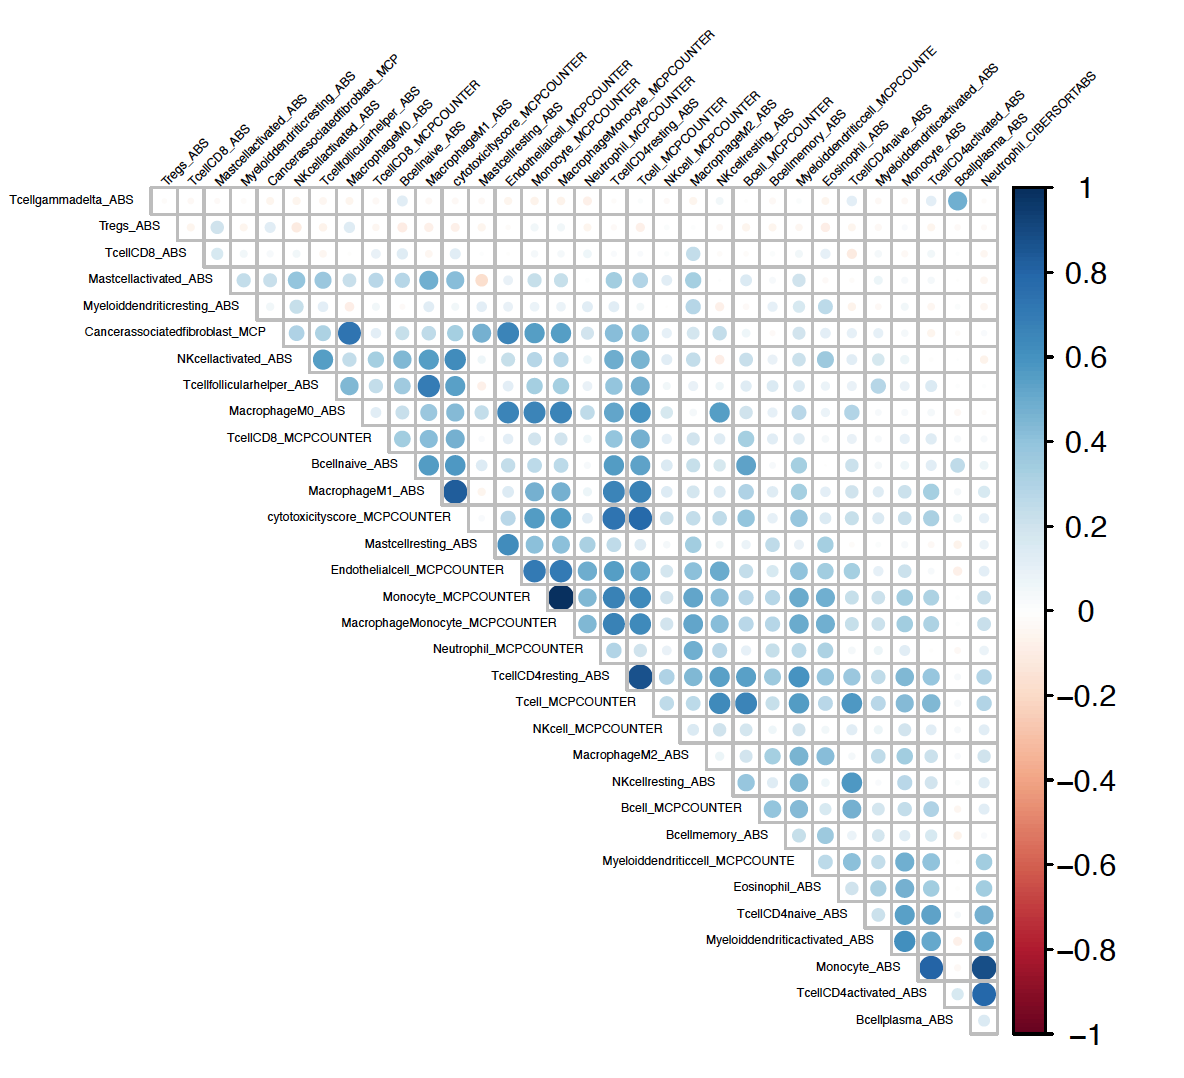


**Supplementary Figure 2:** Scatter plots showing the significant linear correlation between T cells abundance evaluated using IHC and (A) CIBERSORTx, and (B) MCP-counter.

**Supplementary Figure 3:** Relative fractions of infiltrating immune cells by CIBERSORTx in MBCs based on (A) TIDE responder status; (B) MBC cluster; (C) PV carrier status; (b) PAM50 molecular subtypes. *Significant differences.

**Supplementary Figure 4:** (A) Heatmap of the 2000 most variable transcripts among the whole series of MBC cases showing two clusters (Cluster 1 and Cluster 2). (B) Volcano Plot showing in red dots the 2338 differentially expressed genes between Cluster 1 and Cluster 2.

**A**

**B**


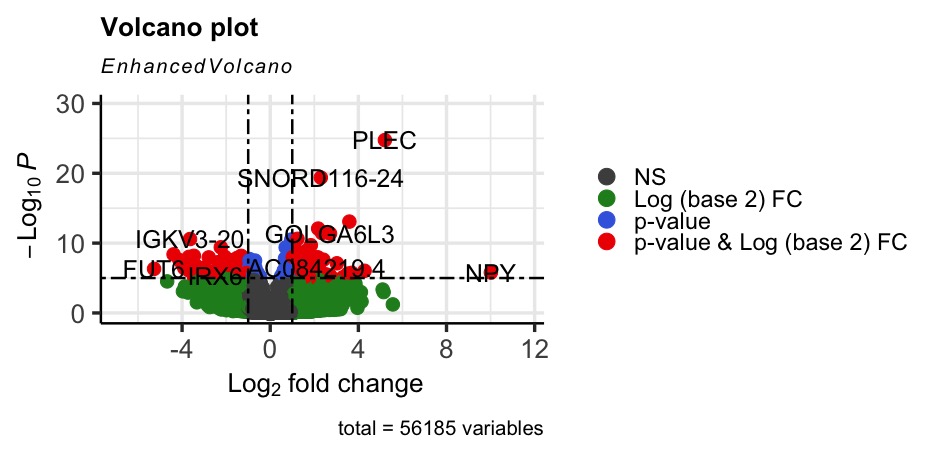


**Supplementary Figure 5:** Radar plot showing the absolute abundances of infiltrating immune cell types by CIBERSORTx based on MBC Cluster classification.

**Supplementary Figure 6:** Box plots showing differentially abundant infiltrating immune cell types and scores between MBCs based on clinical-pathologic features, including tumor grade, Ki67 expression, AR and HER2 status.


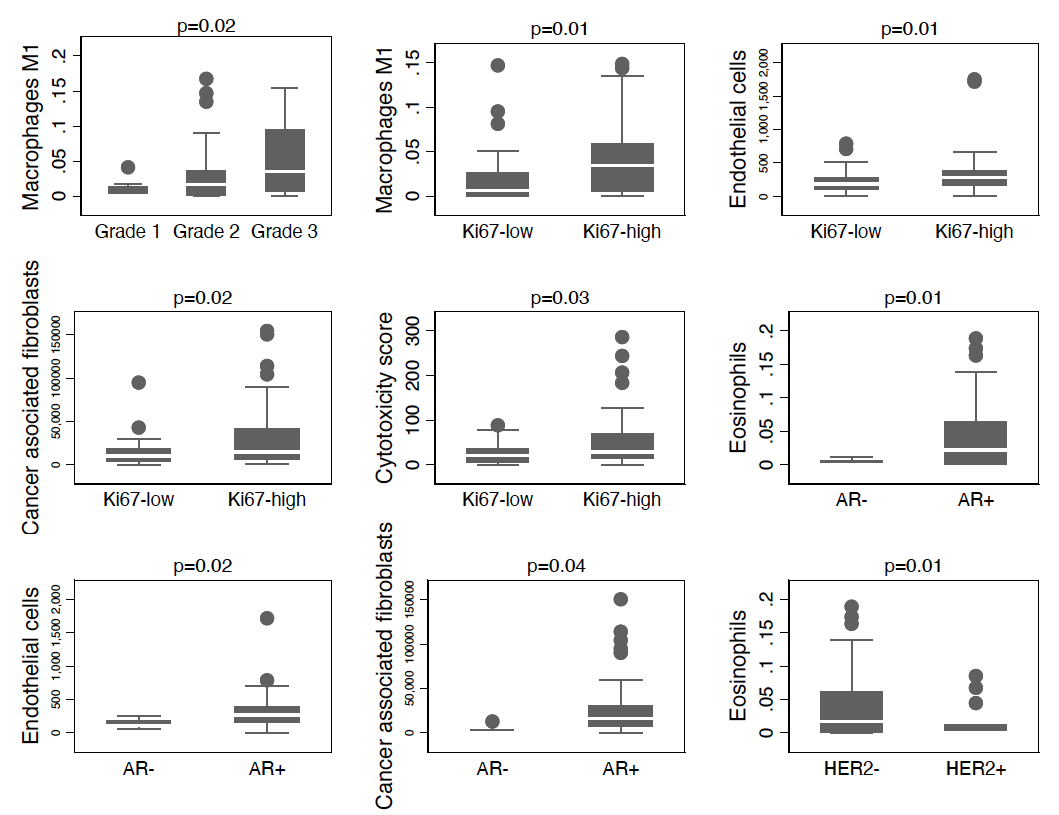


**Supplementary Figure 7:** Radar plot showing the absolute abundances of infiltrating immune cell types by CIBERSORTx based on PAM50 molecular subtypes.
